# Supplementary material for: A sustained type I IFN-neutrophil-IL-18 axis drives pathology during mucosal viral infection
Source: eLife. 2021 May 28;10:e65762. doi: 10.7554/eLife.65762 (PMC8163503; doi:10.7554/eLife.65762)
Supplement: Figure 1—source data 1. [file elife-65762-fig1-data1.xlsx]

## Sheet: Sheet1
Figure 1 - Source Data
A - neutrophil numbers
d.p.i.	isotype ctrl
0	7340	8430	11400	15700	77400	29000
2	33900	29800	50000	42400	62600	41000	32100	94300	12800
4	8660	48900	42700	93600	44800	63800
6	21400	2580	13100	12300	10800	10400	20800	5490
d.p.i.	anti-Ly6G
0	365	250	3280	1650	6440	3830
2	7920	21200	6340	56600	13800	10900	1750	7060	4400
4	2460	14700	6450	550	14900	7490
6	3140	2830	1300	3800	180	120	56.9	2610	2940	3540
two-way ANOVA with Bonferroni's multiple comparisons test on log-transformed numbers
p values: d0 = 0.0012, d2 - 0.0272, d4 = 0.0054, d6 = 0.0002
B - inflammation scores
d.p.i.	isotype ctrl
4	0	0	0	0	0	0	0	0	0	0	0	0	0	0	0	0	0	0	0	0	0	0.5	0
5	0.5	1	1	0.5	0.5	0	2	0.5	0	0.5	1	0	0.5	0.5	0.5	0.5	0.5	0	1	0.5	0	1	0.5
6	2	2	2	2	1.5	1	2.5	2	1	1.5	2	2	2	0.5	1.5	1.5	1	0	2	1.5	0.5	2	1.5
7	2.5	2	3	2.5	3	2	5	2.5	1	2.5	2.5	2.5	3	2	2	2	2	1.5	4	3	1	4	3
d.p.i.	anti-Ly6G
4	0	0	0	0	0	0	0	0	0	0	0	0	0	0	0	0	0	0	0	0	0.5	0	0	0	0
5	0	0	0	0	0.5	0.5	1	0.5	1	1.5	1	1.5	0	0	0	0	0.5	0	0.5	0	1	1	1	0.5	0
6	0.5	1	0.5	0	0	0.5	1	0.5	1.5	2.5	1.5	2.5	1.5	0	0	0	1	0	1.5	0	1.5	1	1.5	1	0
7	0.5	1	1	0	0.5	1.5	2	1	2	3.5	2	2.5	2.5	0	0	0.5	1	0.5	2	0	2.5	1.5	1.5	1.5	0
repeated measures two-way ANOVA with Geisser-Greenhouse correction (epsilon = 0.5779) and Bonferroni's multiple comparisons test
p values: d4 >0.9999, d5>0.9999, d6 = 0.0044, d7 <0.0001
D - raw viral titers
d.p.i.	isotype ctrl
1	64	1640	1600	10200	9200	8080	10800	3520	1180	174	442	498	36	1700	1240	3440	11200	210	64	160	628	84
2	7200	624000	492000	26800	428000	284000	612000	560000	188000	24300	248000	173000	87600	131000	38700	271000	69300	16500	8990	11700	15000	76000	176000	34800	19800	38600	25200	7200
3	12600	17200	8000	13200	6200	7400	34500	11600	8600	8000	20600	17800	31000	21000	4600
4	20900	11600	23300	9830	80600	5690	7390	10900	1920	7360	6480	7200	7600	2000	5320	4000
5	4030	4360	2880	1730	3910	84	360	186	60	164	3120	7400	7960	6140	6960	2080	554	3620
6	115	4.8	272	65	96
7	3	36	70	3	2580	158	4	4
d.p.i.	anti-Ly6G
1	48	100	24	7600	54	6940	5080	2320	128	144	48	1120	1080	4	4520	418	3740	11000	4400	6840	429	467
2	25600		52000	260000	4000	132000	156000	188000	86800	53200	273000	115000	347000	84000	46100	32300	112000	32400	364000	27000	28400	81200	36600	34600	78400	43200	1340	11600
3	35400	4000	16800	5800	11000	5000	64000	140000	37900	8800	20600	150000	41800	98100	9600
4	163000	40300	19500	10000	37900	52300	5530	7010	5280	13000	5710	22800	14600	7840	28200	56000	22400
5	19700	7820	4460	4560	34100	40800	2960	3420	4560	8760	1300	6000	38800	152000	9960	2620	1740	7720	13320
6	1390	62.4	24	4.8	667	3650
7	46	78	98	96	3	372	148	16
Mixed-effects analysis on log10 transformed values with Bonferroni's multiple comparisons test
p values: d1 = 0.9617, d2 = 0.9976, d3 = 0.9038, d4 = 0.6293, d5 = 0.0040, d6 = 0.9023, d7 = 0.9182
samples with no plaques are assigned a value of 3 (under the limit of detection of 4)
E - raw viral titers and tissue weights
isotype ctrl			anti-Ly6G
PFU	mg tissue		PFU	mg tissue
3	32.4		3	24.4
50	29.6		36	30.6
50	27		3	27.1
24	33.4		1200	32.6
82	43.5		4	38.1
34	28.3		52	37.4
3	35.9		3	23
3	36.7		36	31.1
Mann-Whitney on log-transformed values
p = 0.7389
samples with no plaques are assigned a value of 3 (under the limit of detection of 4)
