# Supplementary material for: A sustained type I IFN-neutrophil-IL-18 axis drives pathology during mucosal viral infection
Source: eLife. 2021 May 28;10:e65762. doi: 10.7554/eLife.65762 (PMC8163503; doi:10.7554/eLife.65762)
Supplement: Figure 1—source data 2. [file elife-65762-fig1-data2.xlsx]

## Sheet: Supplement 1
Figure 1 - Supplement 1 Source Data
A - cell numbers
d.p.i.	isotype
0	17	99	203	84	111	104	52
2	1524	4503	4998	4467
4	5219	25375	30671	26369	1535	1850	1544
6	2742	2225	111804	71200	1238	1335	502
d.p.i.	anti-Ly6G
0	48	89	39	220	169	301	128	87	73
2	3083	570	828	3287	2508	2742
4	5896	11239	21239	99348	177245	115627	1401	2104	2118
6	8213	20023	27782	15005	156677	100154	142546	1505	1943	416
two-way ANOVA with Bonferroni's multiple comparisons test
p values: d0, d2>0.9999, d4 = 0.1594, d6 = 0.6073
B - cell numbers
d.p.i.	isotype
0	147.384	33.6031	68.315	339.869	385.698	530.445	2387	2825.99	2335.95
2	1204.52	1023.24	1013.45	45197.2	34923.7	11792.4
4	64000	46500	57700	2383.24	8348.16	7074.7	51703.9	44484.3	32653.3
6	5560	4150	723.831	1473.33	13552.4	5707.71	14560	45672.4	29929.6
d.p.i.	anti-Ly6G
0	55.9281	55.5266	100.931	544.057	415.684	277.804	2887.79	1604.88	1532.47
2	935.533	328.98	249.099	30346.2	12797	29725.4
4	114000	72000	656.708	11470.6	12229.6	11365.7	49549	68453.6	47152.8
6	1115.58	1333.51	4390	8670	118.249	10990.7	6836.87	47515.8	60296.1	26457.4
two-way ANOVA with Bonferroni's multiple comparisons test
p values: d0, d2, d4, d6>0.9999
C - cell numbers
d.p.i.	isotype
0	147.384	153.495	134.1	421.526	131.118	372.561
2	127.335	175.975	245.782
4	199.683	202.209	206.18	670.287	1935.81	1306.79
6	868.352	1394	3316.36	989.891	11239.7	6276.45	2340	2980
d.p.i.
0	97.4231	157.325	203.375	298.423	512.639	205.902
2	205.576	244.521	87.7635
4	204.834	194.143	278.719	1429.36	1646.65	1787.56
6	939.161	4232.1	1250.44	938.07	12812.9	8940.52	2730	13300
two-way ANOVA with Bonferroni's multiple comparisons test
p values: d0, d2, d4>0.9999, d6 = 0.6429
% PMN of total live leukocytes
d.p.i.	isotype ctrl
0	8.95718	20.9803	17.994	20.8988	17.6598	15.842	17.9796	21.8567	20.5217
2	9.26175	11.0815	11.1987
4	26.28	31.8066	57.3917	33.085	30.0167	32.6161
6	31.7216	33.4181	75.0389	56.7048	45.5732	72.2818
d.p.i.	anti-Ly6G
0	1.35922	2.2682	4.34692	7.02899	7.32702	9.38104	5.84604	6.27273	7.75316
2	1.67713	0.983881	0.502508
4	1.03783	2.35115	1.24666	10.1485	9.43985	9.41237
6	4.63473	2.54875	3.60571	13.2303	8.15551	14.2262
two-way ANOVA with Bonferroni's multiple comparisons test
p values: d0 = 0.0129, d2 = 0.6928, d4 <0.0001, d6<0.0001

## Sheet: Supplement 2
B - Ly6C+ CD11b+ numbers
d.p.i.	isotype ctrl
0	14	15	17	99	203	84	111	104	52
2	3347	1833	1524	4503	4998	4467
4	3440	7066	5219	25375	30671	26369	1535	1850	1544
6	9029	2466	2742	2225	111804	71200	1238	1335	502
d.p.i.	anti-Ly6G
0	89	39	220	169	301	128	87	73
2	570	828	3287	2508	2742
4	11239	21239	99348	177245	115627	1401	2104	2118
6	20023	27782	15005	156677	100154	142546	1505	1943	416
two-way ANOVA with Bonferroni's multiple comparisons test on log-transformed numbers
p values: d0, d2>0.9999, d4 = 0.9242, d6 = 0.4350
C - CD3- NK1.1+ numbers
d.p.i.	isotype ctrl
0	147.384	33.6031	68.315	339.869	385.698	530.445	2387	2825.99	2335.95
2	1204.52	1023.24	1013.45	45197.2	34923.7	11792.4
4	64000	46500	57700	2383.24	8348.16	7074.7	51703.9	44484.3	32653.3
6	5560	4150	723.831	1473.33	13552.4	5707.71	14560	45672.4	29929.6
d.p.i.	anti-Ly6G
0	55.9281	55.5266	100.931	544.057	415.684	277.804	2887.79	1604.88	1532.47
2	935.533	328.98	249.099	30346.2	12797	29725.4
4	114000	72000	656.708	11470.6	12229.6	11365.7	49549	68453.6	47152.8
6	1115.58	1333.51	4390	8670	118.249	10990.7	6836.87	47515.8	60296.1	26457.4
two-way ANOVA with Bonferroni's multiple comparisons test on log-transformed numbers
p values: all >0.9999
D - CD3+ CD4+ numbers
d.p.i.	isotype ctrl
0	147	153	134	422	131	373
2	127	176	246
4	200	202	206	670	1936	1307
6	868	1394	3316	990	11240	6276	2340	2980
d.p.i.	anti-Ly6G
0	97	157	203	298	513	206
2	206	245	88
4	205	194	279	1429	1647	1788
6	939	4232	1250	938	12813	8941	2730	13300
two-way ANOVA with Bonferroni's multiple comparisons test on log-transformed numbers
p values: all >0.9999
E - CD3+ CD8+ numbers
d.p.i.	isotype ctrl
0	93	19	44	246	131	326
2	200	209	203
4	375	479	448	1378	3005	3244
6	567	585	1932	322	7401	1923	1320	1830
d.p.i.	anti-Ly6G
0	401	63	59	94	185	173
2	193	94	108
4	408	461	428	2930	4255	2161
6	789	2555	260	522	5338	3265	1540	15600	15600
two-way ANOVA with Bonferroni's multiple comparisons test on log-transformed numbers
p values: all >0.9999

## Sheet: Supplement 3
Figure 1 - Supplement 2 Source Data
B - inflammation scores
d.p.i.	ctrl
4	0	0	0	0	0.5	0	0	0	0	0
5	0.5	0.5	0.5	1	1.5	0.5	0	0	0.5	0
6	0.5	0.5	1	1.5	2	0.5	0.5	1	1	0.5
7	0.5	1	1.5	2	2.5	1.5	0.5	1	1.5	1
d.p.i.	PAD4 CKO
4	0	0	0	0.5	0	0	0	0	0
5	0.5	0.5	0	1.5	0.5	0.5	0.5	0.5	0.5
6	0.5	1	1.5	2.5	1.5	1	1	0.5	1
7	0.5	2.5	2.5	4.5	2.5	1.5	1.5	0.5	1.5
repeated measures two-way ANOVA with Geisser-Greenhouse correction (epsilon = 0.4602) and Bonferroni's multiple comparisons test
p values: d4, d5, d6>0.9999, d7 = 0.7421
C - raw viral titers
d.p.i.	ctrl
1	11400	12600	6000	11700	12	68	88	12
3	40100	42300	53700	92300	3400	3400	28400	7600
5	1840	3340	1380	2140	4560	1620	2680	800
d.p.i.	PAD4 CKO
1	14300	46800	29600	174	60	42	120
3	101000	16800	48500	40100	4800	6000	4800
5	987	423	1360	3820	656	1810	1510
two-way ANOVA on log10 transformed values with Bonferroni's multiple comparisons test
p values: all ctrl vs PAD4 CKO>0.9999
samples with no plaques are assigned a value of 3 (under the limit of detection of 4)

## Sheet: Supplement 4
Figure 1 - Supplement 3 Source Data
A - DCFDA MFI values
ctrl	HSV-2 stimulated
20146	29183
17907	69893
5288	40909
10977	33113
two-tailed unpaired t-test
p value = 0.0231
B - inflammation scores
d.p.i.	ctrl
4	0	0	0.5	0	0	0	0.5	0.5
5	1	0.5	1	0	0	0.5	1	0.5
6	1	1	1	0.5	0.5	1.5	1	1.5
7	1.5	1.5	2	1	0.5	2	1.5	1.5
d.p.i.	Ncf2 KO
4	0	0.5	0.5	0	0	0	0	0	0	0
5	0.5	1	1.5	0	0.5	0	0	0	1	0.5
6	1.5	1	2	0.5	1	1	0.5	0	1	1
7	1.5	1.5	2	1.5	2	2	1.5	0.5	1	2
repeated measures two-way ANOVA with Geisser-Greenhouse correction (epsilon = 0.8329) and Bonferroni's multiple comparisons test
p values: d4, d5, d6, d7>0.9999
C - raw viral titers
d.p.i.	ctrl
1	12	263	832	15800	6920	54400	59200	32000
3	232000	95700	57400	16600	46400	1200	23600	20800
5	720	1620	525	2020	6480	2080	3520	1180
d.p.i.	Ncf2 KO
1	222	643	248	7240	12000	81600	38400	92800	40000	2340
3	23600	33200	122000	26400	45900	46400	3800	65300	7800	23200
5	288	509	1970	4640	16800	2640	2380	5440	500	3640
two-way ANOVA on log10 transformed values with Bonferroni's multiple comparisons test
p values: d1, d3, d5>0.9999
D - inflammation scores
d.p.i.	ctrl
4	0	0	0.5	0	0
5	1	1.5	1	0.5	1.5
6	1.5	2	2.5	1	2.5
7	2	2.5	2.5	2	2.5
d.p.i.	STIM1/STIM2 DKO
4	0	0	0	0.5
5	1	1	1	1
6	2.5	2.5	2.5	2.5
7	3	3	4.5	2.5
repeated measures two-way ANOVA with Geisser-Greenhouse correction (epsilon = 0.6920) and Bonferroni's multiple comparisons test
p values: d4, d5>0.9999, d6 = 0.4348, d7 = 0.4504
E - raw viral titers
d.p.i.	ctrl
1	22800	3780	4360	12000	29600
3	168000	228000	136000	1360000	24600
5	41600	13600	4040	800	5080
d.p.i.	STIM1/STIM2 DKO
1	15600	13600	4440	12400
3	766000	25600	3160000	4880000
5	7600	11200	2460	21600
two-way ANOVA on log10 transformed values with Bonferroni's multiple comparisons test
p values: d1, d5>0.9999, d3 = 0.4220
samples with no plaques are assigned a value of 3 (under the limit of detection of 4)
