# Supplementary material for: A sustained type I IFN-neutrophil-IL-18 axis drives pathology during mucosal viral infection
Source: eLife. 2021 May 28;10:e65762. doi: 10.7554/eLife.65762 (PMC8163503; doi:10.7554/eLife.65762)
Supplement: Figure 2—figure supplement 1—source data 1. [file elife-65762-fig2-figsupp1-data1.xlsx]

## Sheet: Sheet1
Figure 2 - Supplement 1 Source Data
A - raw viral titers
d.p.i.	HSV-1
1	1620	2900	800	1560	5200	140	2080	252	3160	460	1510	784	613	680	17000	3640	11900	1020	10800	68800
2	9710	4640	46400	5890	52000	274000	122000	944000	110000	512000	124000	71200	50400	30000	8690	86800	4670	5490	39200	61200
3	40000	14900	5680	1720	1260	1920	3890	6000	34400	6400	70400	27600	160000	30400	976000	592000	392000
4	8530	2480	260	5250	6720	10900	5600	2500	3	4400	4680	21600	23600	980	1880	10300	2120	7390
5	200	12000	1720	1960	900	920	2880	3460	394	392	60	48	3	28	4320	11000	9120	32000	14200
6	68	20	3	3	8	122	3	3	92	216	2880	376	3	3	32	3	32	4	3	981
d.p.i.	HSV-2
1	62400	16800	48000	10100	1180	551	2380	2140	264	854	300	520	285	210	64	160	628	84	12200	2730	4300	51200
2	35400	47200	108000	31300	91600	55600	73200	89600	0	760	0	6130	740
3	60800	11600	18000	37200	23600	7400	8000	2200	16000	8800	1780	800	2950	4530	2870	2850	3530	0	23200	113000	420000	213000
4	5690	7390	10900	1920	7360	6480	7200	7600	2000	5320	4000	5560	220000	128000	44000	117000	8290	1540	9070
5	6400	1480	9200	2260	2120	1280	1520	4800	7200	11200	3480	3340	6620	4420	84	360	186	60	164
6	44	152	811	516	20	7000	3	368	120	92	1340	230	387
repeated measures two-way ANOVA with Bonferroni's multiple comparisons test on log-transformed values
p values: d1, d2, d3, d5>0.9999, d4 = 0.3152, d6 = 0.0140
B - raw viral titers and tissue weights
HSV-1		HSV-2
PFU	mg tissue	PFU	mg tissue
3	18.1	3	11.2
3	11	4	20.3
4	16.3	4	16.9
3	24.2	86	15.9
3	14.6	284	13.1
3	15.4	489.333	15.6
3	14.5	12	12.7
		3	15.6
		3	21.7
Mann-Whitney on log-transformed values
p = 0.0497
samples with no plaques are assigned a value of 3 (under the limit of detection of 4)
C - raw viral titers
d.p.i.	isotype ctrl
1	460	1510	784	613	680	17000	3640	11900	1020	10800
2	151000	5490	2780	4760	12600	52000	274000	122000	944000	110000
3	4000	3	15800	6000	34400	6400	70400	27600
4	10900	5600	2500	3	4400	8530	2480	260	5250	6720
5	392	60	48	3	28	4320	11000	9120	32000	14200
d.p.i.	anti-Ly6G
1	44400	28400	107000	2200	14000	10600	10200	7640	4440
2	15200	25500	34500	29900	880000	130000	592000	6530	480000	304000
3	8800	1600	4400	10600	19800	30000	5200	17800
4	2840	2040	2600	1120	6690	6370	73600	59200	17900	47200
5	3680	1490	845	212	1310	16400	97600	4340	78400	20600
repeated measures two-way ANOVA with Bonferroni's multiple comparisons test on log-transformed values
p values: d1 = 0.2307, d2, d3>0.9999, d4 = 0.4885, d6 = 0.1605
samples with no plaques are assigned a value of 3 (under the limit of detection of 4)
