# Supplementary material for: A sustained type I IFN-neutrophil-IL-18 axis drives pathology during mucosal viral infection
Source: eLife. 2021 May 28;10:e65762. doi: 10.7554/eLife.65762 (PMC8163503; doi:10.7554/eLife.65762)
Supplement: Figure 2—source data 1. [file elife-65762-fig2-data1.xlsx]

## Sheet: Sheet1
Figure 2 - Source Data
A - inflammation scores
d.p.i.	HSV-1
4	0	0	0	0	0	0	0	0	0	0	0	0	0	0
5	0	0	0	0	0.5	0	0	0	0	0	0.5	0	0	0
6	0	0	0	0	1.5	0	0.5	0.5	0	0.5	0.5	0	0	0
7	0	0.5	0	1.5	2	0	1	1	0	0	0.5	0	1.5	0
d.p.i.	HSV-2
4	0	0	0	0	0	0.5	0	0	0	0.5	0	0	0
5	0	0.5	0	0.5	0.5	1.5	0.5	0.5	0	1.5	0.5	0.5	0.5
6	2	2.5	1	0.5	2	2	1	1.5	0.5	2	2	2	0.5
7	2.5	4.5	2	2	2.5	2.5	2.5	2.5	2.5	2.5	2.5	2.5	2
repeated measures two-way ANOVA with Geisser-Greenhouse correction (epsilon = 0.6589) and Bonferroni's multiple comparisons test
p values: d4 = 0.6616, d5 = 0.0186, d6<0.0001, d7<0.0001
B - cell counts
d.p.i.
0	452	37900	2150	16900	36300	1400	729
d.p.i.	HSV-1
2	50700	56300	8170	23200	41300	41700	59600	80900
4	14400	27300	11700	25200	11300	22900	4780
6	90000	29500	46900	29800	15100	12500	11200	149000
d.p.i.	HSV-2
2	10500	14500	29100	19000	39900	67400	83100	30500
4	20900	20300	36900	17000	41600	24400	8570
6	22600	57000	144000	14400	36100	39800	48200	85100
two-way ANOVA and Bonferroni's multiple comparisons test
p values: d2, d4, d6>0.9999
C - inflammation scores
d.p.i.	isotype ctrl
4	0	0	0	0	0	0	0	0	0	0
5	0	0	0	0	0.5	0	0.5	0	0	0
6	0	1.5	0	0	0.5	0.5	0.5	0	0	0
7	0	1.5	0	0	0.5	0	0.5	0	1.5	0
d.p.i.	anti-Ly6G
4	0	0.5	0	0	0	0	0	0	0	0
5	0	0	0	0	0	0.5	0.5	0	1	0
6	0.5	0	0	0.5	1.5	0	1.5	0	2	0.5
7	0.5	0	0	0.5	2	1	2	0	2.5	0.5
repeated measures two-way ANOVA with Geisser-Greenhouse correction (epsilon = 0.5267) and Bonferroni's multiple comparisons test
p values: d4, d5>0.9999, d6 = 0.9285, d7 = 0.7117
