# Supplementary material for: A sustained type I IFN-neutrophil-IL-18 axis drives pathology during mucosal viral infection
Source: eLife. 2021 May 28;10:e65762. doi: 10.7554/eLife.65762 (PMC8163503; doi:10.7554/eLife.65762)
Supplement: Figure 3—source data 2. [file elife-65762-fig3-data2.xlsx]

## Sheet: S1 d5 HSV1 vs d5 HSV2 cluster 5
p_val	avg_logFC	pct.1	pct.2	p_val_adj	gene
5.5e-95	-1.40857	0.975	1	1.71e-90	mm10-Irf7
1.73e-76	-1.47706	0.975	0.994	5.36e-72	mm10-Ifit1
1.72e-70	0.924613	0.996	1	5.34e-66	mm10-Actb
9.13e-70	-1.26322	0.954	0.994	2.83e-65	mm10-Gbp2
1.03e-69	-1.41941	0.87	1	3.21e-65	mm10-Ifit3
1.36e-69	-1.73651	0.693	0.978	4.23e-65	mm10-Socs1
1.59e-69	-1.26326	0.622	0.983	4.93e-65	mm10-Nt5c3
4.77e-69	-1.30919	0.845	0.994	1.48e-64	mm10-Gbp5
2.16e-65	-1.16112	0.786	0.994	6.72e-61	mm10-Daxx
4.07e-65	-1.02768	0.983	1	1.26e-60	mm10-Irgm1
1.93e-62	-1.56594	0.626	0.978	5.99e-58	mm10-Ifit2
2.79e-62	-1.69465	0.857	0.994	8.66e-58	mm10-Cxcl10
3.1e-61	-1.22238	0.849	1	9.64e-57	mm10-Ifit3b
8.25e-61	-1.52387	0.672	0.978	2.56e-56	mm10-Tagap
1.64e-59	-1.12261	0.987	1	5.1e-55	mm10-Slfn5
7.36e-59	-0.932979	0.966	1	2.28e-54	mm10-Clec2d
3.23e-58	-1.17639	0.592	0.967	1e-53	mm10-Gbp3
8.74e-58	-1.16333	0.756	0.972	2.72e-53	mm10-Ifi207
4.94e-57	-0.986778	0.987	1	1.53e-52	mm10-Cd274
5.99e-56	-0.950398	0.861	0.989	1.86e-51	mm10-Ctss
1.44e-54	-1.01133	0.782	0.983	4.47e-50	mm10-Usp18
5.3e-54	-0.85583	0.979	0.994	1.64e-49	mm10-Nampt
1.23e-51	-0.907324	0.975	0.994	3.82e-47	mm10-Rnf213
2.07e-51	-0.774457	0.954	0.989	6.44e-47	mm10-Tapbp
2.63e-51	-1.00255	0.479	0.944	8.16e-47	mm10-Olfr56
1.62e-50	-0.99526	0.248	0.844	5.03e-46	mm10-Pml
3.07e-50	-0.976479	0.887	0.994	9.54e-46	mm10-Peli1
6.87e-50	-1.18841	0.992	1	2.13e-45	mm10-Rsad2
7.67e-50	-0.907948	0.912	1	2.38e-45	mm10-9930111J21Rik2
1.01e-49	-1.1352	0.521	0.9	3.15e-45	mm10-Bbx
1.03e-49	-0.702346	0.975	0.994	3.2e-45	mm10-Trafd1
1.25e-49	0.836645	1	0.983	3.87e-45	mm10-Samsn1
3.34e-49	-1.22637	0.353	0.922	1.04e-44	mm10-Ifi209
1.06e-48	-0.966864	0.975	0.994	3.29e-44	mm10-Irf1
1.67e-48	1.97164	0.908	0.411	5.19e-44	mm10-Thbs1
2.22e-48	0.837137	0.954	0.678	6.91e-44	mm10-Kras
2.75e-48	-0.802184	0.945	1	8.53e-44	mm10-Herc6
4.39e-48	-1.54465	0.248	0.867	1.36e-43	mm10-Ifi203
1.13e-47	-0.817112	0.954	0.994	3.52e-43	mm10-Ifi47
2.5e-47	0.952703	0.979	0.767	7.75e-43	mm10-Lyst
6.26e-47	0.994816	1	0.994	1.94e-42	mm10-Cd14
9.96e-47	-0.936007	0.706	0.972	3.09e-42	mm10-Apobec3
4.36e-46	-1.11747	0.55	0.933	1.36e-41	mm10-Ifi211
5.51e-46	-1.10755	0.828	0.983	1.71e-41	mm10-Pnp
7.24e-46	-1.48818	0.891	1	2.25e-41	mm10-Ccl4
7.3e-46	-0.954232	0.941	0.994	2.27e-41	mm10-Gbp7
7.54e-46	-0.701432	1	1	2.34e-41	mm10-Slfn4
1.94e-45	-1.6034	0.391	0.85	6.03e-41	mm10-Cd69
3.47e-45	-1.56848	0.311	0.861	1.08e-40	mm10-Mndal
3.74e-45	0.643078	1	1	1.16e-40	mm10-Cd9
5.08e-45	-0.889798	0.773	0.961	1.58e-40	mm10-Znfx1
2.18e-44	-0.776742	0.761	0.978	6.77e-40	mm10-Tor3a
6.74e-44	-0.694689	1	1	2.09e-39	mm10-Ier5
2.24e-43	-0.805464	0.975	1	6.95e-39	mm10-Ifi204
2.25e-43	-1.0798	0.408	0.906	7e-39	mm10-Lipg
2.57e-43	-1.06155	0.828	0.989	7.98e-39	mm10-Cmpk2
6.82e-43	-0.8979	0.971	0.994	2.12e-38	mm10-Fcgr4
1.56e-42	0.724136	1	0.983	4.85e-38	mm10-Ifitm2
1.19e-41	0.730947	0.971	0.711	3.69e-37	mm10-Fmnl1
6.82e-41	-0.938819	0.605	0.906	2.12e-36	mm10-Gbp9
7.45e-41	0.486876	1	0.994	2.31e-36	mm10-Fau
7.47e-41	-0.944493	0.66	0.944	2.32e-36	mm10-Fndc3a
1.55e-40	-0.699305	0.987	1	4.8e-36	mm10-Parp14
2.89e-40	-0.802439	0.937	0.978	8.97e-36	mm10-Rnf19b
4.97e-40	-0.810227	0.571	0.911	1.54e-35	mm10-Psme2b
7.6e-40	0.72574	0.992	0.883	2.36e-35	mm10-Mrpl33
8.28e-40	-0.676074	0.903	0.978	2.57e-35	mm10-Helz2
1.62e-39	0.720606	0.992	0.8	5.02e-35	mm10-Emilin2
1.76e-39	-0.526647	1	1	5.46e-35	mm10-B2m
2.14e-39	0.566532	0.992	1	6.65e-35	mm10-S100a11
2.71e-39	0.644647	1	1	8.43e-35	mm10-Cebpb
3.63e-39	-0.705668	0.987	1	1.13e-34	mm10-Isg20
2.03e-38	-0.687357	0.95	0.994	6.3e-34	mm10-Tor1aip1
7.61e-38	-0.78443	0.975	0.994	2.36e-33	mm10-Oasl1
9.57e-38	0.663851	0.992	0.933	2.97e-33	mm10-Ndel1
2.02e-37	0.536825	1	0.989	6.26e-33	mm10-Lcp1
1.31e-36	0.681408	1	1	4.06e-32	mm10-Actg1
3.78e-36	0.511847	1	0.983	1.17e-31	mm10-Fxyd5
3.88e-36	-0.639297	0.996	1	1.21e-31	mm10-Csrnp1
1.69e-35	0.546472	1	1	5.25e-31	mm10-Cd44
1.97e-35	-0.543329	1	1	6.13e-31	mm10-H2-K1
2.22e-35	0.746312	0.941	0.672	6.89e-31	mm10-Mcemp1
3.28e-35	0.458827	1	1	1.02e-30	mm10-Rps27
8.94e-35	0.75631	0.966	0.767	2.78e-30	mm10-Gcnt2
1.2e-34	-1.19458	0.84	0.944	3.71e-30	mm10-Wfdc17
1.35e-34	-0.607947	0.95	0.994	4.19e-30	mm10-Zc3hav1
1.6e-34	0.42902	1	1	4.98e-30	mm10-H3f3a
1.92e-34	0.655485	0.971	0.85	5.97e-30	mm10-Myh9
1.99e-34	-0.655894	0.769	0.956	6.18e-30	mm10-H2-T22
3.78e-34	-0.512405	1	1	1.17e-29	mm10-Trim30a
3.89e-34	-0.991424	0.718	0.928	1.21e-29	mm10-Plac8
6.71e-34	0.573917	0.987	0.933	2.09e-29	mm10-Sorl1
7.78e-34	-0.875864	0.303	0.783	2.42e-29	mm10-P2ry13
1.2e-33	-0.759509	0.773	0.956	3.74e-29	mm10-Eif2ak2
1.25e-33	0.761844	0.924	0.561	3.88e-29	mm10-Coq10b
1.27e-33	0.617195	0.987	0.961	3.93e-29	mm10-Lilrb4a
1.55e-33	0.683761	0.992	0.917	4.82e-29	mm10-Gapdh
4.91e-33	0.448679	1	1	1.53e-28	mm10-Mcl1
9.11e-33	0.372352	1	1	2.83e-28	mm10-Eif1
1.3e-32	0.637328	0.962	0.872	4.03e-28	mm10-Lrrfip1
1.81e-32	-0.779111	0.765	0.95	5.61e-28	mm10-Etnk1
2.22e-32	0.537878	0.996	0.961	6.89e-28	mm10-Cfl1
3.94e-32	0.764504	0.983	0.856	1.22e-27	mm10-Slc16a3
4.68e-32	0.989363	0.731	0.211	1.45e-27	mm10-Rdh12
8.3e-32	-0.699699	0.891	0.983	2.58e-27	mm10-Ifih1
9.77e-32	1.16939	0.987	0.9	3.03e-27	mm10-G0s2
9.94e-32	-0.775603	0.685	0.928	3.09e-27	mm10-Ralgds
1.05e-31	-0.689467	0.87	0.978	3.27e-27	mm10-Rhoh
1.86e-31	-0.747649	0.744	0.956	5.78e-27	mm10-Zufsp
3.94e-31	-0.479917	0.983	1	1.22e-26	mm10-Rtp4
5.38e-31	-0.548329	0.983	0.994	1.67e-26	mm10-Sp100
6.07e-31	-0.930692	0.168	0.683	1.89e-26	mm10-Ifi205
7.13e-31	-0.588876	0.958	0.994	2.22e-26	mm10-Slfn8
8.15e-31	-0.576645	0.916	0.989	2.53e-26	mm10-Parp10
1.58e-30	-0.727912	0.765	0.961	4.9e-26	mm10-Cd164
2.35e-30	-0.627006	0.727	0.917	7.3e-26	mm10-Casp8
3.09e-30	-0.591278	0.874	0.978	9.61e-26	mm10-Parp9
3.73e-30	0.647492	0.975	0.8	1.16e-25	mm10-AC110211.1
4.09e-30	-0.949546	0.462	0.794	1.27e-25	mm10-Gyg
5.35e-30	-0.555015	0.971	1	1.66e-25	mm10-Oas3
5.36e-30	-0.573216	0.933	0.994	1.66e-25	mm10-Ddx58
5.94e-30	-0.607887	0.971	0.994	1.85e-25	mm10-Trim12a
6.16e-30	-0.678168	0.588	0.9	1.91e-25	mm10-Vcpip1
8.43e-30	-0.828952	0.319	0.817	2.62e-25	mm10-Trim30c
9.07e-30	0.582328	0.996	0.994	2.82e-25	mm10-Il1r2
1.48e-29	0.68419	0.945	0.783	4.6e-25	mm10-Tpm4
1.94e-29	0.493591	0.996	0.922	6.02e-25	mm10-Cdc42
2.24e-29	0.677763	0.87	0.467	6.97e-25	mm10-Ptgs2os2
3.94e-29	0.382499	1	1	1.22e-24	mm10-Tyrobp
4.32e-29	0.505893	1	0.994	1.34e-24	mm10-Pfn1
6.03e-29	-0.688772	0.601	0.872	1.87e-24	mm10-Dapp1
6.92e-29	-0.590413	0.962	1	2.15e-24	mm10-Zbp1
1.05e-28	0.51296	1	0.961	3.25e-24	mm10-Arpc1b
1.49e-28	0.593097	0.992	0.928	4.64e-24	mm10-Dennd4a
1.74e-28	-0.61562	0.504	0.8	5.41e-24	mm10-Ube2l6
2.48e-28	-0.714021	0.626	0.894	7.7e-24	mm10-Cish
5.68e-28	0.464215	1	1	1.76e-23	mm10-Btg1
6.21e-28	-0.610135	0.916	0.994	1.93e-23	mm10-Arf4
1.1e-27	-0.564114	0.945	0.989	3.43e-23	mm10-Sppl2a
1.3e-27	-0.566281	0.437	0.744	4.05e-23	mm10-Sft2d2
1.77e-27	-0.743616	0.294	0.789	5.49e-23	mm10-Ifi208
2.16e-27	-0.625941	0.937	0.989	6.72e-23	mm10-Plekho2
2.64e-27	-0.469302	0.975	0.989	8.2e-23	mm10-Themis2
2.66e-27	-0.562955	0.613	0.9	8.28e-23	mm10-Parp12
3.73e-27	0.443755	0.979	0.961	1.16e-22	mm10-Gng5
3.76e-27	-0.829251	0.521	0.839	1.17e-22	mm10-D1Ertd622e
4.67e-27	0.605189	0.996	0.911	1.45e-22	mm10-Coro1a
7.3e-27	-0.561467	1	0.994	2.27e-22	mm10-Samhd1
9.57e-27	-0.635097	0.895	1	2.97e-22	mm10-Ddx60
1.12e-26	-0.555119	0.584	0.844	3.48e-22	mm10-Dhx58
1.2e-26	-0.570226	0.765	0.933	3.72e-22	mm10-1600014C10Rik
1.39e-26	-0.575721	0.958	0.983	4.31e-22	mm10-Ly6e
1.44e-26	-0.750123	0.819	0.972	4.46e-22	mm10-Clic4
1.73e-26	-0.694436	0.773	0.878	5.37e-22	mm10-Tarm1
6e-26	0.710028	0.849	0.467	1.86e-21	mm10-Fam107b
8.19e-26	-0.714058	0.256	0.689	2.54e-21	mm10-Fcgr1
1e-25	-0.523484	0.916	0.983	3.11e-21	mm10-H2-Q4
1.14e-25	-0.510512	0.857	0.956	3.54e-21	mm10-Ogfr
1.34e-25	-0.940813	0.408	0.817	4.15e-21	mm10-Cybb
2.33e-25	0.654282	0.874	0.533	7.23e-21	mm10-Ripor2
3.29e-25	0.570895	0.983	0.911	1.02e-20	mm10-Jdp2
3.42e-25	-0.695566	0.29	0.711	1.06e-20	mm10-Mgam
4.07e-25	0.634226	0.798	0.4	1.26e-20	mm10-Cyth1
5.36e-25	-0.537009	0.059	0.489	1.67e-20	mm10-P2ry14
5.57e-25	0.50467	0.979	0.872	1.73e-20	mm10-Rpl34
6.44e-25	0.600924	0.941	0.733	2e-20	mm10-Snx18
6.54e-25	-0.609028	0.882	0.967	2.03e-20	mm10-Gdap10
1.31e-24	0.498173	0.95	0.839	4.06e-20	mm10-Myl12a
2.26e-24	0.461471	0.992	0.9	7.03e-20	mm10-Rps16
2.82e-24	-0.520337	0.891	0.972	8.76e-20	mm10-Dtx3l
3.12e-24	-0.936881	1	1	9.69e-20	mm10-Zfp36
3.34e-24	-0.602357	0.542	0.806	1.04e-19	mm10-Nub1
3.58e-24	-0.526664	0.975	0.994	1.11e-19	mm10-Casp4
4.86e-24	-0.835177	0.13	0.578	1.51e-19	mm10-Gbp4
5.84e-24	1.11788	0.866	0.633	1.81e-19	mm10-Lcn2
6.74e-24	0.568464	0.958	0.839	2.09e-19	mm10-Cotl1
9.79e-24	0.457612	0.992	0.833	3.04e-19	mm10-Cap1
1.3e-23	0.607522	0.912	0.689	4.03e-19	mm10-D8Ertd738e
1.58e-23	0.464897	0.996	0.994	4.9e-19	mm10-Rps29
1.89e-23	-0.467218	0.874	0.95	5.86e-19	mm10-Oas2
1.99e-23	-0.759903	0.777	0.922	6.17e-19	mm10-Rnasel
2.15e-23	-0.614558	0.748	0.917	6.66e-19	mm10-Ripk1
2.51e-23	1.04368	0.912	0.661	7.78e-19	mm10-Fos
2.7e-23	0.619833	0.878	0.544	8.39e-19	mm10-Cd80
3.14e-23	0.558215	0.903	0.617	9.74e-19	mm10-Rnf11
3.7e-23	-0.6561	0.466	0.772	1.15e-18	mm10-Ppp1r15b
4.55e-23	-0.523338	0.84	0.95	1.41e-18	mm10-Lgals9
4.68e-23	0.652092	0.866	0.533	1.45e-18	mm10-Gpat3
4.92e-23	-0.570191	0.748	0.939	1.53e-18	mm10-Npc2
6.67e-23	-0.438486	1	1	2.07e-18	mm10-Isg15
9.91e-23	0.617381	0.882	0.75	3.08e-18	mm10-Gpr35
9.98e-23	-0.616108	0.803	0.978	3.1e-18	mm10-Trim56
1.14e-22	0.544036	0.996	0.994	3.54e-18	mm10-Tgm2
1.26e-22	0.655692	0.912	0.694	3.91e-18	mm10-Slc11a1
1.49e-22	0.444288	0.975	0.878	4.63e-18	mm10-Rhoa
2e-22	0.589038	0.958	0.811	6.22e-18	mm10-Hif1a
2.27e-22	0.534443	0.815	0.422	7.06e-18	mm10-Cd300a
2.38e-22	-0.530492	0.878	0.972	7.38e-18	mm10-Xaf1
3.83e-22	0.483158	0.992	0.939	1.19e-17	mm10-Tpm3
4.7e-22	-0.369139	1	1	1.46e-17	mm10-Acod1
6.94e-22	0.556309	1	1	2.16e-17	mm10-Fth1
7.89e-22	0.763028	0.975	0.911	2.45e-17	mm10-Bcl2a1b
8.37e-22	-0.58842	0.134	0.522	2.6e-17	mm10-Mgat1
9.82e-22	-0.528409	0.693	0.944	3.05e-17	mm10-Azi2
9.99e-22	-0.413415	0.996	1	3.1e-17	mm10-Oasl2
1.56e-21	0.520936	0.966	0.828	4.84e-17	mm10-Cyth4
1.64e-21	0.728273	0.937	0.856	5.1e-17	mm10-Tiparp
1.66e-21	1.01922	0.929	0.678	5.14e-17	mm10-Lyz2
1.68e-21	-0.387568	1	1	5.23e-17	mm10-H2-D1
1.76e-21	0.587779	0.891	0.617	5.47e-17	mm10-Eno1
1.9e-21	0.453215	0.979	0.883	5.89e-17	mm10-Rps13
2.2e-21	-0.627358	0.824	0.906	6.84e-17	mm10-Atp6v1a
2.39e-21	-0.598966	0.412	0.794	7.41e-17	mm10-Slfn9
2.8e-21	-0.534853	0.357	0.678	8.7e-17	mm10-Pnpla2
2.92e-21	0.583912	0.966	0.922	9.07e-17	mm10-Ccl6
3.45e-21	0.586087	0.567	0.15	1.07e-16	mm10-Sephs2
3.67e-21	1.55313	0.613	0.167	1.14e-16	mm10-Cxcl3
3.78e-21	0.474361	0.992	0.911	1.17e-16	mm10-Rac2
3.92e-21	0.533622	0.887	0.589	1.22e-16	mm10-Sra1
5.74e-21	0.770651	0.761	0.367	1.78e-16	mm10-Bcl2a1d
6.3e-21	-0.446785	0.143	0.556	1.96e-16	mm10-Pdk3
6.61e-21	0.56987	0.975	0.911	2.05e-16	mm10-Adam8
8.91e-21	0.527726	0.983	0.889	2.77e-16	mm10-Gsr
1.06e-20	-0.663428	0.223	0.611	3.3e-16	mm10-Ppa1
1.08e-20	0.720118	0.861	0.567	3.34e-16	mm10-Ldha
1.09e-20	-0.463457	0.966	0.994	3.4e-16	mm10-Tap1
1.14e-20	-0.568419	0.828	0.939	3.55e-16	mm10-Stat2
1.17e-20	-0.608873	0.63	0.878	3.64e-16	mm10-Pcgf5
1.18e-20	0.635208	0.92	0.778	3.66e-16	mm10-Dmxl2
1.21e-20	0.405662	0.983	0.933	3.76e-16	mm10-Cox8a
1.61e-20	0.272263	0.412	0.039	4.99e-16	mm10-Hbb-bs
1.71e-20	-0.753235	0.168	0.556	5.31e-16	mm10-Ifit1bl1
1.74e-20	-0.552065	0.408	0.711	5.41e-16	mm10-Lmo2
1.84e-20	-0.520716	0.853	0.967	5.71e-16	mm10-Myd88
1.88e-20	0.537975	0.92	0.744	5.83e-16	mm10-Rpl10
1.98e-20	0.378856	0.987	0.978	6.14e-16	mm10-Myl6
2.2e-20	0.537076	0.992	0.9	6.84e-16	mm10-Neurl3
2.38e-20	0.426224	1	1	7.39e-16	mm10-Tmsb4x
2.48e-20	-0.534941	0.916	0.983	7.7e-16	mm10-Igtp
2.99e-20	0.470996	0.987	0.861	9.29e-16	mm10-Rpl27a
3.29e-20	0.440016	0.996	0.917	1.02e-15	mm10-Rpl9
3.62e-20	-0.887175	0.798	0.939	1.12e-15	mm10-Tnf
3.86e-20	0.527539	0.933	0.733	1.2e-15	mm10-Aldoa
4.54e-20	-0.477558	0.349	0.711	1.41e-15	mm10-Rnpep
4.62e-20	0.491624	0.908	0.678	1.43e-15	mm10-Cmip
4.73e-20	0.46788	0.975	0.894	1.47e-15	mm10-Alox5ap
4.79e-20	-0.602255	0.933	0.989	1.49e-15	mm10-Ctsz
5.26e-20	0.444371	0.992	0.978	1.63e-15	mm10-Atp2b1
5.8e-20	0.41974	0.975	0.939	1.8e-15	mm10-Rps21
7.18e-20	0.450065	0.979	0.989	2.23e-15	mm10-Nfe2l2
8.68e-20	0.60365	0.996	1	2.7e-15	mm10-S100a8
8.82e-20	0.490068	0.979	0.928	2.74e-15	mm10-Rpl37a
9.13e-20	-0.879566	0.84	0.961	2.84e-15	mm10-Icam1
1.11e-19	0.448746	1	0.978	3.44e-15	mm10-Spag9
1.13e-19	-0.510008	0.941	0.972	3.5e-15	mm10-Ranbp2
1.38e-19	0.646331	0.878	0.611	4.29e-15	mm10-Gpcpd1
1.41e-19	-0.506056	0.286	0.617	4.38e-15	mm10-Fam241a
1.58e-19	0.847887	0.874	0.628	4.91e-15	mm10-Lrg1
1.59e-19	-0.458339	0.084	0.461	4.94e-15	mm10-Amotl2
2e-19	0.419512	0.992	0.967	6.22e-15	mm10-Rps27a
2.42e-19	-0.468343	0.929	0.972	7.53e-15	mm10-Irf2
3.97e-19	0.481547	1	0.994	1.23e-14	mm10-Slc7a11
4.5e-19	0.459181	0.954	0.839	1.4e-14	mm10-Selenon
4.63e-19	-0.519819	0.282	0.6	1.44e-14	mm10-Dcp2
5.87e-19	0.511496	0.807	0.45	1.82e-14	mm10-Cdk11b
7.48e-19	-0.507343	0.992	0.994	2.32e-14	mm10-Fgl2
8.06e-19	0.534105	0.92	0.717	2.5e-14	mm10-Ppp1r3b
1.2e-18	0.881017	0.777	0.478	3.71e-14	mm10-Bcl2a1a
1.31e-18	-0.452731	0.534	0.811	4.06e-14	mm10-Uba7
1.33e-18	-0.547375	0.563	0.789	4.13e-14	mm10-5430427O19Rik
1.36e-18	-0.645336	0.176	0.572	4.22e-14	mm10-Fam26f
1.71e-18	0.487507	0.866	0.567	5.3e-14	mm10-Rlf
1.78e-18	0.944537	0.962	0.883	5.52e-14	mm10-Retnlg
1.95e-18	0.498739	0.845	0.544	6.06e-14	mm10-Apbb1ip
2.02e-18	-0.402873	0.866	0.972	6.28e-14	mm10-Sp110
2.35e-18	0.437452	0.979	0.878	7.28e-14	mm10-Rps10
2.4e-18	0.437576	0.971	0.844	7.46e-14	mm10-Selenok
2.59e-18	-0.471286	0.941	0.983	8.03e-14	mm10-Psmb8
2.87e-18	0.443899	0.945	0.733	8.93e-14	mm10-Pak2
2.96e-18	-0.417195	0.361	0.706	9.19e-14	mm10-Mov10
3.33e-18	-0.496962	0.395	0.733	1.03e-13	mm10-Whamm
3.96e-18	0.42865	0.933	0.789	1.23e-13	mm10-Morf4l1
4.12e-18	0.414839	0.92	0.817	1.28e-13	mm10-Rps3
4.79e-18	-0.471572	0.256	0.617	1.49e-13	mm10-Fam53c
5.08e-18	0.458099	0.996	0.983	1.58e-13	mm10-Prdx5
6.12e-18	-0.44341	0.735	0.878	1.9e-13	mm10-Vps54
6.16e-18	0.477587	0.845	0.506	1.91e-13	mm10-Smim3
7.02e-18	0.499982	0.929	0.772	2.18e-13	mm10-Rps8
7.06e-18	-0.415074	0.118	0.478	2.19e-13	mm10-Dr1
9.41e-18	-0.444486	0.479	0.728	2.92e-13	mm10-Usb1
1.06e-17	-0.660879	0.235	0.622	3.29e-13	mm10-Ly6a
1.07e-17	0.398586	0.958	0.767	3.33e-13	mm10-Ncf4
1.07e-17	0.415821	0.983	0.878	3.33e-13	mm10-Capzb
1.09e-17	0.511457	0.912	0.683	3.39e-13	mm10-Spata13
1.12e-17	0.460507	0.933	0.733	3.48e-13	mm10-Hectd1
1.31e-17	0.456804	0.861	0.594	4.08e-13	mm10-Arpc4
1.46e-17	0.361771	0.555	0.161	4.53e-13	mm10-Dctn4
1.7e-17	0.4905	0.861	0.589	5.28e-13	mm10-Cd300c2
1.75e-17	0.538564	0.71	0.35	5.43e-13	mm10-Gcnt1
1.76e-17	-0.553924	0.134	0.5	5.48e-13	mm10-Ffar2
2.09e-17	-0.395984	0.105	0.456	6.51e-13	mm10-Olfml2b
2.11e-17	0.585009	0.744	0.444	6.56e-13	mm10-Isy1
2.67e-17	0.428496	0.971	0.878	8.29e-13	mm10-Rpl38
2.76e-17	-0.436748	0.971	0.994	8.58e-13	mm10-Lcp2
2.84e-17	-0.442237	0.534	0.778	8.81e-13	mm10-Tmem184b
2.97e-17	0.414568	0.966	0.867	9.23e-13	mm10-Inpp5d
3.08e-17	0.314134	1	1	9.57e-13	mm10-Tpd52
3.97e-17	-0.418691	0.899	0.983	1.23e-12	mm10-Rap2c
4.66e-17	-0.375968	0.101	0.461	1.45e-12	mm10-Tmem67
5.13e-17	-0.40503	0.609	0.761	1.59e-12	mm10-Ubr4
5.75e-17	-0.473722	0.744	0.944	1.78e-12	mm10-Tmem140
5.89e-17	-0.412737	0.08	0.389	1.83e-12	mm10-Noc2l
6.23e-17	-0.473475	0.903	0.961	1.93e-12	mm10-Tspo
6.37e-17	0.48431	0.908	0.711	1.98e-12	mm10-Antxr2
6.73e-17	-0.458766	0.357	0.694	2.09e-12	mm10-Prpf38a
7.23e-17	-0.4391	0.861	0.944	2.25e-12	mm10-Il15
9.2e-17	0.429157	0.941	0.711	2.86e-12	mm10-Rpl19
1.03e-16	0.392467	0.996	0.994	3.18e-12	mm10-Iqgap1
1.06e-16	-0.546158	0.643	0.828	3.28e-12	mm10-March5
1.12e-16	-0.114654	0.029	0.289	3.47e-12	mm10-Ms4a4c
1.12e-16	-0.467001	0.303	0.639	3.49e-12	mm10-Slc28a2
1.14e-16	-0.46021	0.483	0.722	3.54e-12	mm10-Xdh
1.14e-16	-0.534626	0.525	0.789	3.54e-12	mm10-Map3k8
1.27e-16	0.405785	0.84	0.55	3.94e-12	mm10-Stk40
1.39e-16	0.44423	0.845	0.589	4.31e-12	mm10-Fam32a
1.45e-16	0.394113	0.992	0.956	4.49e-12	mm10-C5ar1
1.52e-16	-0.348689	1	1	4.72e-12	mm10-Tmbim6
1.65e-16	-0.477307	0.647	0.789	5.11e-12	mm10-Cdk9
1.79e-16	0.37293	0.979	0.778	5.57e-12	mm10-Map2k3
1.82e-16	0.382039	0.983	0.867	5.64e-12	mm10-Ostf1
1.9e-16	0.610097	0.706	0.333	5.9e-12	mm10-Fpr1
2.4e-16	0.425936	0.987	0.95	7.45e-12	mm10-Fosl2
2.41e-16	0.482349	0.845	0.528	7.49e-12	mm10-Emd
2.49e-16	-0.406844	0.613	0.772	7.73e-12	mm10-Trim26
2.69e-16	0.418889	0.828	0.5	8.35e-12	mm10-Tmed10
2.72e-16	0.394857	0.681	0.3	8.45e-12	mm10-Klhl2
3.09e-16	0.600149	0.63	0.25	9.59e-12	mm10-Arrdc3
3.34e-16	0.472834	0.954	0.811	1.04e-11	mm10-Spi1
3.34e-16	0.432777	1	0.983	1.04e-11	mm10-Cox17
3.8e-16	-0.494395	0.954	0.994	1.18e-11	mm10-Atf3
3.93e-16	0.539985	0.899	0.661	1.22e-11	mm10-Cpeb2
3.94e-16	-0.537348	0.655	0.811	1.22e-11	mm10-Jaml
4e-16	-0.363157	0.139	0.467	1.24e-11	mm10-Gm5431
5.69e-16	0.360106	0.996	0.961	1.77e-11	mm10-Rpl23
5.8e-16	-0.411732	0.303	0.65	1.8e-11	mm10-Arel1
5.96e-16	-0.537749	0.992	1	1.85e-11	mm10-Sat1
6.11e-16	-0.601845	0.748	0.894	1.9e-11	mm10-C3
6.46e-16	0.344804	0.979	0.956	2.01e-11	mm10-Sf3b1
7.58e-16	-0.473114	0.239	0.583	2.35e-11	mm10-Tifa
8.87e-16	0.429497	0.845	0.628	2.76e-11	mm10-Tln1
9.09e-16	-0.450324	0.769	0.933	2.82e-11	mm10-Nmi
9.42e-16	0.431156	0.908	0.744	2.93e-11	mm10-Rpl18
9.8e-16	0.420231	0.971	0.894	3.04e-11	mm10-Card19
1e-15	0.364681	0.975	0.917	3.11e-11	mm10-Son
1.02e-15	0.394071	0.983	0.95	3.18e-11	mm10-Sh3bgrl3
1.07e-15	-0.486878	0.664	0.844	3.31e-11	mm10-Mycbp2
1.08e-15	0.475279	0.929	0.794	3.37e-11	mm10-Rps28
1.12e-15	0.400185	0.937	0.833	3.48e-11	mm10-Atp5e
1.17e-15	-0.428029	1	1	3.64e-11	mm10-Ifitm3
1.32e-15	-0.413338	0.357	0.683	4.09e-11	mm10-Psma5
1.5e-15	-0.467023	0.718	0.883	4.67e-11	mm10-Cers6
1.74e-15	-0.536079	0.605	0.828	5.39e-11	mm10-Tmem33
1.82e-15	-0.626931	0.571	0.8	5.67e-11	mm10-Fam46a
2.02e-15	0.54545	1	0.994	6.27e-11	mm10-S100a6
2.16e-15	-0.529746	0.387	0.661	6.7e-11	mm10-Tec
2.17e-15	-0.450101	0.811	0.933	6.73e-11	mm10-Arl6ip1
2.37e-15	0.332294	1	1	7.35e-11	mm10-Cd52
2.4e-15	-0.410023	0.769	0.906	7.46e-11	mm10-H13
2.41e-15	-0.381386	0.958	0.994	7.48e-11	mm10-N4bp1
2.51e-15	-0.268508	0.084	0.383	7.79e-11	mm10-Mlkl
2.65e-15	0.436268	0.761	0.4	8.22e-11	mm10-Ssh2
2.78e-15	0.489864	0.693	0.344	8.65e-11	mm10-Irak3
2.93e-15	-0.372951	0.529	0.8	9.1e-11	mm10-Tdrd7
2.99e-15	0.408556	0.979	0.928	9.27e-11	mm10-Gnai2
3.18e-15	-0.389244	0.895	0.95	9.88e-11	mm10-Ist1
3.35e-15	-0.463096	0.937	0.989	1.04e-10	mm10-Trim12c
3.35e-15	0.537759	0.996	0.956	1.04e-10	mm10-AY036118
3.36e-15	-0.381952	0.181	0.494	1.04e-10	mm10-Fam84b
3.59e-15	0.477449	0.845	0.533	1.12e-10	mm10-Ankrd11
4.02e-15	0.454623	0.916	0.678	1.25e-10	mm10-Tnrc18
4.16e-15	0.319606	1	0.972	1.29e-10	mm10-Serf2
4.29e-15	0.359258	1	0.972	1.33e-10	mm10-Arpc3
4.87e-15	0.411421	0.95	0.811	1.51e-10	mm10-Clic1
4.95e-15	0.373237	0.71	0.339	1.54e-10	mm10-Cdk17
6.06e-15	0.614173	0.811	0.494	1.88e-10	mm10-Fosb
8.07e-15	0.484237	0.857	0.606	2.51e-10	mm10-Usmg5
8.13e-15	0.334808	0.992	0.978	2.52e-10	mm10-Actr3
8.78e-15	-0.4725	0.71	0.861	2.73e-10	mm10-Treml2
8.8e-15	-0.214634	0.017	0.261	2.73e-10	mm10-Arg1
9.52e-15	0.454071	0.761	0.467	2.96e-10	mm10-Slc16a6
9.76e-15	0.380633	0.975	0.917	3.03e-10	mm10-Rpl35a
1.17e-14	0.596491	0.916	0.772	3.63e-10	mm10-Clec4n
1.3e-14	-0.301823	0.147	0.472	4.05e-10	mm10-Slc25a22
1.35e-14	0.461026	0.882	0.694	4.19e-10	mm10-Rpl13
1.37e-14	-0.482592	0.609	0.828	4.25e-10	mm10-Abtb2
1.38e-14	0.505815	1	0.994	4.3e-10	mm10-S100a9
1.41e-14	-0.428804	0.769	0.883	4.36e-10	mm10-Atp11b
1.63e-14	0.380815	0.962	0.839	5.07e-10	mm10-Itgam
1.65e-14	-0.391165	0.185	0.511	5.11e-10	mm10-Insig1
1.68e-14	0.393565	0.916	0.794	5.21e-10	mm10-Prkar1a
1.73e-14	-0.383193	0.975	0.994	5.36e-10	mm10-Tnfrsf1a
1.84e-14	0.302608	1	0.994	5.72e-10	mm10-Rps9
1.95e-14	0.336759	0.996	0.983	6.06e-10	mm10-Vasp
2.16e-14	-0.661072	0.42	0.706	6.71e-10	mm10-Rnd1
2.47e-14	-0.312707	0.139	0.439	7.66e-10	mm10-Gm47283
2.64e-14	-0.162337	0.008	0.228	8.2e-10	mm10-Ccl7
2.66e-14	-0.38708	0.996	1	8.27e-10	mm10-Hspa5
2.72e-14	-0.398167	0.42	0.678	8.44e-10	mm10-Smg7
2.93e-14	-0.387788	0.706	0.844	9.1e-10	mm10-Irf5
3.15e-14	-0.397705	0.895	0.972	9.78e-10	mm10-Usp25
3.56e-14	-0.438975	0.534	0.772	1.1e-09	mm10-Tor1aip2
3.83e-14	0.277473	0.546	0.178	1.19e-09	mm10-Vamp3
4.08e-14	0.327168	0.996	0.978	1.27e-09	mm10-Rpl41
4.1e-14	-0.554404	0.702	0.883	1.27e-09	mm10-Brd2
4.22e-14	0.396837	0.962	0.894	1.31e-09	mm10-Rpl39
4.22e-14	-0.520561	0.004	0.211	1.31e-09	mm10-Muc3
4.4e-14	-0.452728	0.319	0.644	1.37e-09	mm10-Man2a1
4.51e-14	0.462007	0.987	0.922	1.4e-09	mm10-Chd7
4.62e-14	-0.434142	0.773	0.894	1.43e-09	mm10-Etv6
4.76e-14	-0.326866	0.147	0.406	1.48e-09	mm10-Hibadh
4.77e-14	0.329825	0.983	0.961	1.48e-09	mm10-Laptm5
4.85e-14	-0.335322	0.756	0.883	1.51e-09	mm10-Rab1a
5.39e-14	-0.244485	0.042	0.311	1.67e-09	mm10-Tpst1
5.48e-14	0.398795	0.832	0.594	1.7e-09	mm10-Pitpna
5.52e-14	-0.290752	0.092	0.383	1.71e-09	mm10-Setdb2
6.18e-14	-0.469575	0.29	0.622	1.92e-09	mm10-Ccdc25
6.23e-14	-0.581439	0.63	0.783	1.93e-09	mm10-Katna1
6.6e-14	0.450395	0.908	0.767	2.05e-09	mm10-Sbno2
6.72e-14	-0.407606	0.92	0.967	2.09e-09	mm10-Arid5a
7.63e-14	-0.45082	0.429	0.728	2.37e-09	mm10-Mb21d1
7.71e-14	0.439388	0.95	0.844	2.39e-09	mm10-Dnaja1
8.9e-14	0.340428	0.576	0.222	2.76e-09	mm10-Gm14548
9.2e-14	0.363405	0.958	0.883	2.86e-09	mm10-Rps25
9.26e-14	0.521529	0.992	0.956	2.88e-09	mm10-Slpi
1.02e-13	-0.364064	0.399	0.622	3.17e-09	mm10-Trim21
1.1e-13	0.384835	1	1	3.4e-09	mm10-Dusp1
1.18e-13	0.495972	0.882	0.672	3.65e-09	mm10-P4hb
1.21e-13	-0.412828	1	1	3.77e-09	mm10-Hcar2
1.22e-13	-0.384658	0.782	0.889	3.8e-09	mm10-Zcchc2
1.26e-13	0.358753	0.975	0.911	3.92e-09	mm10-Rplp2
1.65e-13	0.34755	0.958	0.839	5.13e-09	mm10-Arf5
1.68e-13	0.460541	0.832	0.528	5.22e-09	mm10-Klf3
1.8e-13	-0.291561	0.076	0.378	5.6e-09	mm10-Ifi213
1.81e-13	0.402471	0.929	0.739	5.62e-09	mm10-Por
2.21e-13	0.397293	0.975	0.883	6.87e-09	mm10-Rpl30
2.24e-13	-0.385098	0.723	0.861	6.97e-09	mm10-Ifi35
2.36e-13	-0.457144	0.403	0.678	7.34e-09	mm10-Il15ra
2.37e-13	0.32012	0.92	0.828	7.37e-09	mm10-Grb2
2.4e-13	-0.481572	0.172	0.483	7.45e-09	mm10-Prnp
2.49e-13	0.369568	0.706	0.361	7.73e-09	mm10-Mdh2
3.03e-13	0.410381	0.941	0.811	9.42e-09	mm10-Rhog
3.36e-13	0.393666	0.861	0.633	1.04e-08	mm10-Ski
3.64e-13	-0.335646	0.937	0.994	1.13e-08	mm10-Samd9l
3.69e-13	0.400234	0.84	0.578	1.15e-08	mm10-Actn1
3.73e-13	0.416595	0.458	0.128	1.16e-08	mm10-Nt5e
3.8e-13	0.376099	0.975	0.911	1.18e-08	mm10-Rpl37
4.01e-13	-0.364297	0.811	0.967	1.25e-08	mm10-Nlrc5
4.05e-13	0.43127	0.992	0.989	1.26e-08	mm10-Btg2
4.31e-13	0.402917	0.958	0.917	1.34e-08	mm10-Dusp16
4.5e-13	0.337468	0.706	0.372	1.4e-08	mm10-Mthfsl
4.51e-13	-0.422549	0.353	0.65	1.4e-08	mm10-Fcgr2b
4.57e-13	0.290287	0.45	0.122	1.42e-08	mm10-Wbp1l
4.84e-13	-0.361841	0.908	0.906	1.5e-08	mm10-Shisa5
4.96e-13	0.388792	0.874	0.622	1.54e-08	mm10-Sept7
5.8e-13	-0.421548	0.513	0.739	1.8e-08	mm10-Fabp5
5.83e-13	0.399857	0.672	0.35	1.81e-08	mm10-Mfsd6
5.89e-13	-0.373293	0.966	0.994	1.83e-08	mm10-H2-T23
5.93e-13	0.404993	0.756	0.517	1.84e-08	mm10-Gpx4
5.94e-13	-0.36759	0.155	0.456	1.85e-08	mm10-Elmod3
6.04e-13	0.334431	0.601	0.25	1.88e-08	mm10-Slc25a33
6.38e-13	0.354063	0.744	0.428	1.98e-08	mm10-Slc27a4
6.41e-13	0.385943	0.861	0.606	1.99e-08	mm10-Rpl11
6.66e-13	0.399151	0.908	0.722	2.07e-08	mm10-Chst11
6.96e-13	0.356336	0.933	0.789	2.16e-08	mm10-Rpl21
7.33e-13	0.23039	1	1	2.28e-08	mm10-Litaf
8.64e-13	0.397993	0.584	0.261	2.68e-08	mm10-Amer2
9.72e-13	-0.405263	0.66	0.833	3.02e-08	mm10-Abcg1
1.02e-12	0.21422	0.374	0.078	3.16e-08	mm10-Def6
1.13e-12	0.37747	0.765	0.467	3.5e-08	mm10-Kdm2a
1.15e-12	0.273774	1	1	3.58e-08	mm10-Fcer1g
1.2e-12	0.355061	0.866	0.6	3.72e-08	mm10-Ndufa7
1.22e-12	-0.410196	0.748	0.9	3.8e-08	mm10-Pttg1
1.27e-12	0.355422	0.727	0.406	3.95e-08	mm10-Plp2
1.3e-12	-0.352001	0.693	0.833	4.04e-08	mm10-Adar
1.41e-12	0.364936	0.979	0.933	4.39e-08	mm10-Cd300ld
1.46e-12	-0.357584	0.937	0.978	4.52e-08	mm10-Snx10
1.51e-12	0.362991	0.693	0.367	4.7e-08	mm10-Rpl15
1.54e-12	0.384373	0.958	0.872	4.79e-08	mm10-Fgr
1.6e-12	0.359614	0.63	0.294	4.96e-08	mm10-Hdac4
1.63e-12	-0.537082	0.126	0.406	5.08e-08	mm10-Endov
1.68e-12	0.345081	0.765	0.439	5.22e-08	mm10-Drap1
1.89e-12	0.332379	0.92	0.678	5.88e-08	mm10-Gpsm3
1.9e-12	-0.398884	0.441	0.689	5.9e-08	mm10-Fnbp4
1.97e-12	-0.351026	0.206	0.5	6.12e-08	mm10-Prkce
1.98e-12	0.410794	0.681	0.35	6.15e-08	mm10-Rb1cc1
2.02e-12	0.400957	0.84	0.589	6.28e-08	mm10-Rpl24
2.03e-12	0.426178	0.815	0.622	6.31e-08	mm10-Lrrc25
2.04e-12	0.388028	0.857	0.644	6.34e-08	mm10-Clint1
2.06e-12	-0.375285	0.681	0.772	6.39e-08	mm10-Stk24
2.08e-12	-0.38679	0.773	0.878	6.47e-08	mm10-1810037I17Rik
2.12e-12	0.364268	0.954	0.889	6.59e-08	mm10-Anxa2
2.15e-12	-0.376839	0.605	0.772	6.66e-08	mm10-Casp1
2.21e-12	0.3531	0.681	0.339	6.85e-08	mm10-Nsrp1
2.21e-12	0.314233	0.815	0.522	6.87e-08	mm10-Brk1
2.36e-12	0.32349	0.966	0.928	7.34e-08	mm10-Rps14
2.54e-12	-0.590849	0.21	0.533	7.87e-08	mm10-Ifi206
2.61e-12	0.364145	0.828	0.528	8.09e-08	mm10-Sin3b
2.73e-12	0.290103	0.987	0.972	8.48e-08	mm10-Cyba
3.11e-12	-0.352008	0.424	0.672	9.66e-08	mm10-Stard3
3.21e-12	0.377291	0.996	0.967	9.95e-08	mm10-Ddx6
3.28e-12	-0.76236	0.37	0.589	1.02e-07	mm10-Steap4
3.31e-12	0.356167	0.887	0.806	1.03e-07	mm10-Rpl8
3.38e-12	0.289378	1	0.994	1.05e-07	mm10-Msrb1
3.43e-12	0.423469	0.95	0.8	1.07e-07	mm10-Stk17b
3.65e-12	-0.382434	1	1	1.13e-07	mm10-Ubc
3.68e-12	-0.285932	0.273	0.567	1.14e-07	mm10-Stk19
3.73e-12	-0.430026	0.084	0.35	1.16e-07	mm10-Batf2
3.83e-12	-0.356509	0.92	0.972	1.19e-07	mm10-Gsap
4.05e-12	0.366037	0.466	0.156	1.26e-07	mm10-Cd93
4.1e-12	-0.581813	0.845	0.956	1.27e-07	mm10-Ccl3
4.24e-12	0.419875	0.819	0.556	1.32e-07	mm10-Alcam
4.53e-12	0.386631	0.672	0.417	1.41e-07	mm10-Ifnar1
4.59e-12	0.268318	0.555	0.211	1.42e-07	mm10-Galnt11
5.41e-12	0.447994	0.954	0.922	1.68e-07	mm10-Adgre5
5.59e-12	-0.635569	0.416	0.583	1.74e-07	mm10-Srsf2
7e-12	0.304341	0.63	0.294	2.17e-07	mm10-Smim14
8.01e-12	0.292531	0.966	0.917	2.49e-07	mm10-Atp5l
8.92e-12	-0.338392	0.559	0.744	2.77e-07	mm10-Otud5
9.73e-12	-0.292547	0.118	0.4	3.02e-07	mm10-Gm12185
1e-11	-0.240701	0.155	0.406	3.11e-07	mm10-Gm10076
1.11e-11	-0.375104	0.374	0.594	3.45e-07	mm10-Srsf7
1.19e-11	0.334202	0.971	0.9	3.68e-07	mm10-Itgb2
1.21e-11	0.439039	0.958	0.911	3.75e-07	mm10-Nudt4
1.24e-11	-0.135181	0.004	0.178	3.85e-07	mm10-Ccl8
1.25e-11	0.311392	0.941	0.778	3.89e-07	mm10-Pfdn5
1.25e-11	-0.359724	0.067	0.317	3.89e-07	mm10-Taf4b
1.6e-11	0.318199	0.513	0.189	4.97e-07	mm10-Mrpl52
1.69e-11	-0.952932	0.513	0.578	5.26e-07	mm10-Dnajb9
1.75e-11	-0.392677	0.282	0.583	5.43e-07	mm10-Larp1
1.86e-11	0.297691	0.576	0.25	5.78e-07	mm10-Vamp4
2.3e-11	0.325458	0.697	0.4	7.13e-07	mm10-Tmed2
2.3e-11	-0.327866	0.664	0.822	7.14e-07	mm10-Laptm4a
2.43e-11	-0.364945	0.466	0.706	7.54e-07	mm10-Ubn2
2.44e-11	0.318529	0.987	0.906	7.59e-07	mm10-Ehd1
2.47e-11	-0.311563	0.966	0.967	7.66e-07	mm10-Nsd3
2.47e-11	0.370185	0.874	0.811	7.67e-07	mm10-Rps3a1
2.6e-11	0.253762	0.992	0.983	8.06e-07	mm10-Arpc2
2.62e-11	-0.281617	0.139	0.422	8.13e-07	mm10-Ifi214
2.81e-11	0.248275	0.475	0.161	8.73e-07	mm10-Cdk13
2.98e-11	0.422187	0.622	0.328	9.24e-07	mm10-Zfp292
3.12e-11	0.362768	0.777	0.511	9.69e-07	mm10-Fbxo11
3.31e-11	0.295667	0.975	0.906	1.03e-06	mm10-Myl12b
3.45e-11	0.363351	0.832	0.628	1.07e-06	mm10-Rps2
3.62e-11	-0.314922	0.147	0.422	1.12e-06	mm10-Fam208b
3.64e-11	0.313015	0.689	0.394	1.13e-06	mm10-Ppp4c
3.64e-11	-0.529805	0.538	0.706	1.13e-06	mm10-Herc1
3.89e-11	0.335897	0.651	0.361	1.21e-06	mm10-Myo1c
3.93e-11	-0.451979	0.937	0.95	1.22e-06	mm10-Nfkbid
4.05e-11	0.352037	0.874	0.656	1.26e-06	mm10-Ppp1r18
4.56e-11	-0.363901	0.269	0.556	1.42e-06	mm10-Fap
4.6e-11	-0.311569	0.181	0.422	1.43e-06	mm10-Tnfrsf12a
4.66e-11	0.323783	0.513	0.206	1.45e-06	mm10-Cebpz
4.67e-11	0.413392	0.874	0.683	1.45e-06	mm10-Nedd9
5.01e-11	0.297878	0.748	0.444	1.55e-06	mm10-Dennd5a
5.07e-11	0.31472	0.71	0.383	1.57e-06	mm10-Slc22a15
5.76e-11	-0.20244	0.059	0.272	1.79e-06	mm10-Tnfsf10
5.84e-11	-0.416628	0.244	0.422	1.81e-06	mm10-Stxbp3
5.84e-11	0.376514	0.378	0.1	1.81e-06	mm10-Snai1
5.89e-11	0.348699	0.664	0.356	1.83e-06	mm10-Rpl35
5.98e-11	0.256112	0.445	0.15	1.86e-06	mm10-Grk5
6.01e-11	0.326443	0.689	0.383	1.87e-06	mm10-Ndufa2
6.01e-11	0.548189	0.891	0.739	1.87e-06	mm10-Hp
6.95e-11	0.229309	0.433	0.133	2.16e-06	mm10-Gm11808
7.55e-11	0.352082	0.95	0.839	2.34e-06	mm10-App
7.6e-11	0.352477	0.769	0.494	2.36e-06	mm10-Pomp
7.98e-11	0.301828	0.878	0.689	2.48e-06	mm10-Ost4
8.14e-11	-0.6766	0.874	0.944	2.53e-06	mm10-Jun
8.19e-11	0.420278	0.723	0.406	2.54e-06	mm10-Klf7
8.2e-11	0.377335	0.895	0.761	2.55e-06	mm10-Atox1
8.63e-11	0.406805	0.828	0.611	2.68e-06	mm10-Xylt1
9.73e-11	0.290553	0.504	0.189	3.02e-06	mm10-Cdkn2d
9.97e-11	-0.282283	0.139	0.4	3.1e-06	mm10-Snx2
1.02e-10	0.37648	0.941	0.811	3.16e-06	mm10-Mmp9
1.02e-10	-0.397576	0.571	0.778	3.18e-06	mm10-Atp6v0a1
1.04e-10	0.32804	0.87	0.656	3.23e-06	mm10-Kmt2e
1.06e-10	0.377184	0.571	0.278	3.3e-06	mm10-Cd300lb
1.07e-10	-0.368259	0.307	0.517	3.33e-06	mm10-Oat
1.09e-10	0.383225	0.63	0.317	3.39e-06	mm10-Rasa2
1.11e-10	0.36144	0.819	0.561	3.46e-06	mm10-Ncor1
1.16e-10	0.349267	0.929	0.833	3.59e-06	mm10-Slc25a3
1.33e-10	-0.397484	0.849	0.911	4.14e-06	mm10-Bach1
1.35e-10	0.206834	0.319	0.067	4.18e-06	mm10-Nck1
1.39e-10	0.523216	0.685	0.406	4.31e-06	mm10-Cdc42ep3
1.46e-10	-0.377195	0.676	0.867	4.53e-06	mm10-Elf1
1.47e-10	-0.317087	0.639	0.806	4.56e-06	mm10-Ankfy1
1.49e-10	-0.320497	0.576	0.789	4.63e-06	mm10-Milr1
1.5e-10	-0.369006	0.529	0.733	4.65e-06	mm10-Tbrg1
1.52e-10	-0.47785	0.819	0.844	4.73e-06	mm10-Atf4
1.53e-10	-0.328987	0.824	0.878	4.75e-06	mm10-Zc3h7a
1.55e-10	-0.31895	0.256	0.522	4.82e-06	mm10-Slc35b2
1.57e-10	-0.399439	0.651	0.778	4.88e-06	mm10-Hk3
1.69e-10	0.270239	0.584	0.261	5.26e-06	mm10-Stk11
1.7e-10	0.25612	1	1	5.28e-06	mm10-Hdc
1.7e-10	0.25931	0.567	0.244	5.28e-06	mm10-Txnl1
1.74e-10	-0.23377	0.025	0.217	5.4e-06	mm10-Gbp8
1.79e-10	-0.417627	0.622	0.839	5.56e-06	mm10-Mpp1
1.8e-10	-0.388595	0.895	0.967	5.6e-06	mm10-Trim25
1.84e-10	0.319352	0.618	0.311	5.72e-06	mm10-Bsg
1.84e-10	0.26971	0.483	0.178	5.72e-06	mm10-C130050O18Rik
2.15e-10	0.145369	0.244	0.028	6.68e-06	mm10-Gm16867
2.25e-10	0.262069	0.983	0.956	7e-06	mm10-Rpl18a
2.32e-10	0.358362	0.744	0.494	7.21e-06	mm10-Dhrs7
2.37e-10	0.338589	0.92	0.867	7.36e-06	mm10-Rps24
2.43e-10	0.340287	0.878	0.689	7.55e-06	mm10-Vamp8
2.44e-10	0.340355	0.815	0.583	7.58e-06	mm10-Aff4
2.57e-10	0.297248	1	0.989	7.99e-06	mm10-Trem1
2.65e-10	0.399428	0.773	0.506	8.24e-06	mm10-Smad7
2.67e-10	0.369197	0.639	0.361	8.28e-06	mm10-Tfip11
2.72e-10	0.253571	0.382	0.106	8.43e-06	mm10-Snapc1
2.79e-10	-0.337446	0.782	0.856	8.66e-06	mm10-Pdcd10
2.84e-10	0.507266	0.752	0.533	8.81e-06	mm10-Cwc25
2.85e-10	-0.295326	0.345	0.594	8.84e-06	mm10-Smcr8
2.88e-10	0.194076	0.366	0.094	8.94e-06	mm10-Ufsp2
2.94e-10	0.089351	0.164	0.011	9.14e-06	mm10-Zfp523
2.97e-10	0.372753	0.618	0.344	9.22e-06	mm10-Emp3
2.99e-10	0.364625	0.672	0.378	9.27e-06	mm10-Ik
2.99e-10	0.358218	0.966	0.928	9.29e-06	mm10-Rabgef1
3.01e-10	0.36716	0.618	0.344	9.35e-06	mm10-Gm26740
3.11e-10	0.348517	0.618	0.317	9.64e-06	mm10-Sik1
3.32e-10	0.437003	0.95	0.883	1.03e-05	mm10-Wnk1
3.33e-10	0.305201	0.634	0.317	1.03e-05	mm10-Adssl1
3.36e-10	0.176365	0.252	0.033	1.04e-05	mm10-Faap100
3.53e-10	-0.370979	0.866	0.928	1.1e-05	mm10-Ptk2b
3.56e-10	0.293393	0.529	0.228	1.11e-05	mm10-Ube2k
3.64e-10	0.329157	0.794	0.567	1.13e-05	mm10-Rpl29
3.68e-10	0.27907	0.651	0.333	1.14e-05	mm10-Tbc1d23
3.79e-10	-0.227278	0.088	0.333	1.18e-05	mm10-P2ry12
3.96e-10	0.365936	0.786	0.522	1.23e-05	mm10-Rpl36
4.03e-10	0.274756	0.718	0.406	1.25e-05	mm10-Flot1
4.12e-10	0.358404	0.681	0.389	1.28e-05	mm10-Timp2
4.34e-10	-0.340236	0.588	0.817	1.35e-05	mm10-Washc4
4.49e-10	-0.181058	0.05	0.267	1.39e-05	mm10-Casp2
4.85e-10	0.31393	0.912	0.756	1.51e-05	mm10-Rpl27
4.88e-10	-0.675553	0.437	0.622	1.52e-05	mm10-Tob1
4.96e-10	-0.302518	1	0.994	1.54e-05	mm10-Tgoln1
5.01e-10	-0.400844	0.55	0.783	1.55e-05	mm10-Ifit1bl2
5.01e-10	0.175985	0.294	0.056	1.56e-05	mm10-Plekhg3
5.04e-10	0.430608	0.815	0.606	1.57e-05	mm10-Pgk1
5.6e-10	-0.634627	0.588	0.733	1.74e-05	mm10-Cited2
5.98e-10	0.371972	0.882	0.689	1.86e-05	mm10-Emb
6.1e-10	0.191428	1	0.994	1.9e-05	mm10-Gabarap
6.37e-10	-0.106533	0.029	0.217	1.98e-05	mm10-Ms4a6d
6.76e-10	-0.486339	0.521	0.75	2.1e-05	mm10-Ehd4
6.9e-10	-0.298139	0.273	0.533	2.14e-05	mm10-Papd7
7e-10	0.246952	0.223	0.022	2.17e-05	mm10-mt-Nd6
7.06e-10	-0.394962	0.651	0.8	2.19e-05	mm10-Il18bp
7.32e-10	0.382589	0.836	0.6	2.27e-05	mm10-Gsn
7.45e-10	0.351819	0.664	0.383	2.31e-05	mm10-Msra
7.53e-10	-0.265642	0.223	0.461	2.34e-05	mm10-Csprs
7.85e-10	0.376197	0.866	0.661	2.44e-05	mm10-Rps11
7.9e-10	0.28272	0.71	0.411	2.45e-05	mm10-Arpp19
7.91e-10	-0.420036	0.483	0.639	2.46e-05	mm10-Zfp622
8.23e-10	0.286197	0.622	0.322	2.56e-05	mm10-Fam104a
8.36e-10	0.27345	0.987	0.961	2.6e-05	mm10-Gmfg
8.47e-10	0.313043	0.828	0.628	2.63e-05	mm10-Stat6
8.49e-10	0.225654	0.399	0.122	2.64e-05	mm10-Senp6
8.73e-10	0.402707	0.672	0.406	2.71e-05	mm10-Arl4c
8.95e-10	0.335125	0.916	0.722	2.78e-05	mm10-Chd2
9.79e-10	0.354283	0.983	0.944	3.04e-05	mm10-Ncf1
1.06e-09	0.258157	0.525	0.222	3.29e-05	mm10-Stk4
1.08e-09	-0.257236	0.122	0.356	3.36e-05	mm10-Sfmbt2
1.1e-09	-0.641528	0.853	0.933	3.41e-05	mm10-AA467197
1.1e-09	0.380031	0.664	0.394	3.42e-05	mm10-Nipbl
1.11e-09	0.295437	0.525	0.233	3.44e-05	mm10-Eml4
1.12e-09	0.30872	0.878	0.761	3.48e-05	mm10-Rps26
1.14e-09	-0.347441	0.471	0.667	3.53e-05	mm10-Atp11a
1.15e-09	0.23304	0.618	0.306	3.58e-05	mm10-2010107E04Rik
1.2e-09	-0.381967	0.744	0.794	3.72e-05	mm10-Homer1
1.25e-09	0.238071	0.542	0.239	3.88e-05	mm10-Ap2b1
1.26e-09	0.282035	0.584	0.283	3.92e-05	mm10-Rpl14
1.28e-09	-0.322253	0.634	0.75	3.99e-05	mm10-Xpo6
1.29e-09	0.319759	0.66	0.367	3.99e-05	mm10-Lysmd3
1.32e-09	0.287057	0.807	0.522	4.11e-05	mm10-Cox6c
1.33e-09	0.266988	0.731	0.439	4.12e-05	mm10-Ppp1cb
1.46e-09	0.254941	0.445	0.167	4.55e-05	mm10-Shoc2
1.48e-09	0.316111	0.962	0.889	4.59e-05	mm10-Rps23
1.53e-09	-0.321852	0.504	0.694	4.75e-05	mm10-Ubtd1
1.77e-09	0.34179	0.954	0.867	5.48e-05	mm10-Pglyrp1
1.77e-09	0.310038	0.836	0.617	5.5e-05	mm10-Ppp2ca
1.83e-09	0.475066	0.634	0.383	5.68e-05	mm10-Esd
2.08e-09	-1.09721	0.122	0.367	6.45e-05	mm10-Cxcl9
2.1e-09	-0.552693	0.592	0.75	6.51e-05	mm10-Atp6v1b2
2.17e-09	0.175836	0.399	0.128	6.74e-05	mm10-Acsl5
2.17e-09	0.308935	0.992	0.944	6.75e-05	mm10-Ell2
2.37e-09	0.281513	0.504	0.211	7.37e-05	mm10-N4bp2l1
2.47e-09	-0.0828484	0	0.117	7.68e-05	mm10-Gm15056
2.54e-09	0.273986	0.765	0.489	7.87e-05	mm10-Rnf130
2.63e-09	0.225024	0.479	0.189	8.16e-05	mm10-Pfkl
2.68e-09	-0.330271	0.769	0.906	8.32e-05	mm10-Wsb1
2.69e-09	-0.379172	0.176	0.406	8.37e-05	mm10-Nceh1
2.76e-09	0.348696	0.794	0.544	8.56e-05	mm10-Celf2
2.96e-09	-0.388751	0.181	0.417	9.2e-05	mm10-Fam46c
2.98e-09	-0.368448	0.58	0.783	9.26e-05	mm10-Bst2
3.05e-09	-0.327485	0.546	0.694	9.46e-05	mm10-Evi2a
3.18e-09	0.18594	0.412	0.139	9.89e-05	mm10-Itch
3.22e-09	-0.314054	0.786	0.811	9.99e-05	mm10-Tspan13
3.28e-09	0.214675	0.592	0.289	0.000102	mm10-Vps29
3.35e-09	0.226997	0.542	0.244	0.000104	mm10-Pofut2
3.38e-09	0.36744	0.685	0.517	0.000105	mm10-Dgat2
3.42e-09	0.322356	0.718	0.483	0.000106	mm10-Atg3
3.5e-09	-0.41438	0.391	0.533	0.000109	mm10-Ep400
3.69e-09	-0.283533	0.357	0.561	0.000115	mm10-Phc2
3.93e-09	-0.242704	0.996	1	0.000122	mm10-Cd53
4.22e-09	-0.291486	0.542	0.706	0.000131	mm10-Ap1g1
4.43e-09	0.234582	0.433	0.167	0.000138	mm10-Dad1
4.44e-09	0.266177	0.681	0.389	0.000138	mm10-Sar1a
4.56e-09	-0.204286	0.088	0.256	0.000141	mm10-Ccdc138
4.58e-09	0.345281	0.945	0.817	0.000142	mm10-Prdx6
4.72e-09	-0.25795	0.004	0.144	0.000146	mm10-Vgf
4.73e-09	-0.243982	0.126	0.317	0.000147	mm10-Ltv1
4.82e-09	-0.295299	0.517	0.7	0.00015	mm10-Snap29
5.12e-09	-0.349862	0.756	0.878	0.000159	mm10-H2-Q7
5.25e-09	-0.351798	0.664	0.783	0.000163	mm10-Psma7
5.27e-09	0.273442	0.983	0.933	0.000164	mm10-Retreg1
5.28e-09	-0.144166	0.017	0.183	0.000164	mm10-Rgl1
5.45e-09	0.659932	0.765	0.55	0.000169	mm10-Vegfa
6.06e-09	0.27717	0.996	0.972	0.000188	mm10-Txn1
6.15e-09	0.272783	0.853	0.622	0.000191	mm10-Rabac1
6.89e-09	0.268022	0.655	0.361	0.000214	mm10-Rap1a
7.08e-09	0.2924	0.643	0.344	0.00022	mm10-Sntb2
7.29e-09	-0.126056	0.008	0.15	0.000226	mm10-4933412O06Rik
7.3e-09	0.484374	0.916	0.822	0.000227	mm10-Nr4a3
7.37e-09	0.323312	0.983	0.956	0.000229	mm10-Lst1
7.52e-09	-0.377634	0.861	0.883	0.000233	mm10-4932438A13Rik
7.57e-09	-0.1871	0.038	0.228	0.000235	mm10-Cd40
7.6e-09	0.270355	0.513	0.233	0.000236	mm10-Asap1
7.72e-09	0.312433	0.782	0.556	0.00024	mm10-Anp32a
7.95e-09	-0.314455	0.391	0.628	0.000247	mm10-Rab9
8.21e-09	0.237243	0.508	0.222	0.000255	mm10-Lamb3
8.26e-09	0.301989	0.866	0.633	0.000256	mm10-Per1
8.4e-09	0.279114	0.748	0.522	0.000261	mm10-Tm9sf3
8.57e-09	0.266197	0.689	0.406	0.000266	mm10-Mtmr6
8.88e-09	0.33395	1	0.978	0.000276	mm10-Marcksl1
8.9e-09	0.244435	0.403	0.15	0.000276	mm10-Naa35
9.13e-09	0.110772	0.277	0.067	0.000284	mm10-Ppp4r1
9.36e-09	0.227244	0.479	0.2	0.000291	mm10-Nt5c2
9.49e-09	-0.208387	0.088	0.317	0.000295	mm10-Cxcl16
9.87e-09	0.262215	0.542	0.256	0.000306	mm10-Zfp608
1.04e-08	0.255515	0.685	0.406	0.000324	mm10-Nek6
1.05e-08	0.345903	0.681	0.461	0.000326	mm10-Pgd
1.07e-08	0.28293	0.866	0.661	0.000332	mm10-Pet100
1.07e-08	-0.387898	0.134	0.378	0.000332	mm10-Lsmem1
1.1e-08	0.303183	0.634	0.356	0.00034	mm10-Chd1
1.11e-08	-0.231795	0.189	0.422	0.000344	mm10-Hat1
1.11e-08	-0.360242	0.933	0.906	0.000345	mm10-Ppp1r2
1.15e-08	-0.248575	0.223	0.439	0.000357	mm10-Hist3h2a
1.22e-08	-0.157971	0.055	0.261	0.000378	mm10-Mid1
1.22e-08	0.295942	0.861	0.744	0.000378	mm10-Rpl7
1.31e-08	-0.264983	0.504	0.656	0.000407	mm10-Psmb10
1.32e-08	0.772633	0.471	0.272	0.00041	mm10-mt-Atp8
1.41e-08	0.284929	0.929	0.861	0.000439	mm10-Arih2
1.43e-08	-0.364505	0.58	0.733	0.000444	mm10-Arid4a
1.48e-08	0.264629	0.731	0.478	0.000459	mm10-Cnbp
1.53e-08	0.221827	0.441	0.172	0.000475	mm10-Acta2
1.64e-08	-0.624189	0.508	0.55	0.000508	mm10-Hnrnph1
1.64e-08	0.292186	0.756	0.483	0.000509	mm10-Sec61g
1.64e-08	0.336793	0.899	0.733	0.00051	mm10-Suco
1.77e-08	-0.20715	0.08	0.294	0.000551	mm10-Ikzf5
1.8e-08	-0.17872	0.063	0.256	0.00056	mm10-Phf11c
1.85e-08	-0.256752	0.277	0.517	0.000574	mm10-Tcirg1
1.88e-08	0.179797	0.454	0.183	0.000584	mm10-Pts
1.91e-08	-0.303633	0.824	0.933	0.000594	mm10-Aff1
1.93e-08	0.197864	0.311	0.083	0.000601	mm10-Stard7
1.96e-08	0.402545	0.769	0.589	0.00061	mm10-Xbp1
1.98e-08	0.22704	0.479	0.206	0.000614	mm10-Syap1
1.98e-08	-0.303414	0.42	0.589	0.000616	mm10-Tle4
1.99e-08	0.26664	0.979	0.933	0.000618	mm10-Rplp1
2.06e-08	-0.312113	0.571	0.667	0.000639	mm10-Ankrd17
2.06e-08	0.259479	0.408	0.161	0.000641	mm10-Sesn2
2.08e-08	0.242718	0.979	0.944	0.000647	mm10-Efhd2
2.15e-08	0.34449	0.618	0.383	0.000666	mm10-Rab32
2.21e-08	0.0955357	0.151	0.006	0.000687	mm10-Hba-a2
2.26e-08	0.208809	0.508	0.228	0.000701	mm10-A530013C23Rik
2.29e-08	-0.268502	0.349	0.6	0.00071	mm10-Dnajc13
2.42e-08	0.283274	0.983	0.928	0.000753	mm10-Eef1a1
2.45e-08	-0.423899	0.849	0.939	0.000761	mm10-Sod2
2.49e-08	-0.423482	0.618	0.744	0.000773	mm10-Cpeb4
2.55e-08	0.173294	0.294	0.072	0.000793	mm10-Yeats4
2.58e-08	0.253781	0.706	0.433	0.0008	mm10-Nedd8
2.67e-08	0.252691	0.992	0.944	0.00083	mm10-Sem1
2.7e-08	0.256282	0.765	0.5	0.000839	mm10-Calm3
2.73e-08	0.123747	0.231	0.039	0.000848	mm10-Ankrd22
2.76e-08	-0.2309	0.357	0.533	0.000857	mm10-Eif6
2.76e-08	-0.276511	0.382	0.578	0.000858	mm10-Tapbpl
2.78e-08	-0.22111	0.193	0.383	0.000863	mm10-Pold3
2.84e-08	-0.246119	0.597	0.617	0.000882	mm10-Rab10
2.84e-08	0.425459	0.58	0.306	0.000883	mm10-Trf
2.85e-08	-0.285159	0.807	0.883	0.000885	mm10-Ubl3
3.17e-08	0.247984	0.983	0.989	0.000984	mm10-Picalm
3.21e-08	0.307009	0.878	0.717	0.000997	mm10-Hcst
3.25e-08	0.293382	0.891	0.761	0.00101055	mm10-Rpl28
3.26e-08	-0.273763	0.861	0.9	0.00101264	mm10-Psme1
3.27e-08	-0.321114	0.933	0.978	0.00101656	mm10-Birc3
3.35e-08	0.259509	0.84	0.628	0.00104137	mm10-Sec61b
3.41e-08	0.338931	0.681	0.428	0.00105902	mm10-Rpl32
3.71e-08	0.282818	0.924	0.778	0.00115366	mm10-Trem3
3.93e-08	0.293591	0.887	0.756	0.00122103	mm10-Rac1
3.97e-08	0.299271	0.626	0.35	0.00123443	mm10-Nisch
4.02e-08	0.21259	0.433	0.172	0.00124691	mm10-Ell
4.13e-08	0.181899	0.382	0.133	0.00128206	mm10-Hip1
4.13e-08	-0.318344	0.718	0.794	0.00128379	mm10-Hk1
4.18e-08	0.0940753	0.349	0.139	0.00129662	mm10-Tmem9b
4.36e-08	0.324626	0.979	0.928	0.00135429	mm10-Vmp1
4.37e-08	0.239379	0.71	0.433	0.00135822	mm10-Brd4
4.38e-08	-0.513813	0.714	0.889	0.00136027	mm10-Gm21188
4.51e-08	-0.16988	0.063	0.267	0.00140146	mm10-Ccr5
4.52e-08	0.150662	0.366	0.122	0.00140309	mm10-Prkag1
4.7e-08	0.334146	0.836	0.628	0.00145977	mm10-Pfkp
4.93e-08	0.238248	0.618	0.333	0.00153234	mm10-Taok1
5.12e-08	-0.27831	0.256	0.517	0.00158915	mm10-Gm12216
5.17e-08	-0.412021	0.382	0.544	0.0016049	mm10-Rbm38
5.24e-08	0.14201	1	1	0.00162751	mm10-Srgn
5.4e-08	0.142174	0.269	0.061	0.00167575	mm10-Dnajb2
5.45e-08	-0.345603	0.786	0.883	0.00169129	mm10-Il10ra
5.46e-08	-0.319516	0.849	0.939	0.00169601	mm10-Irgm2
5.81e-08	0.236223	0.933	0.772	0.00180502	mm10-Sh3glb1
5.84e-08	0.136123	0.248	0.05	0.00181416	mm10-Gm37168
6.04e-08	-0.197028	0.046	0.233	0.00187616	mm10-Ccl2
6.09e-08	-0.30876	0.786	0.878	0.00189175	mm10-Pcf11
6.61e-08	0.296285	0.903	0.756	0.00205171	mm10-Slc2a1
6.8e-08	0.564022	0.643	0.444	0.00211105	mm10-F630028O10Rik
6.88e-08	0.301363	0.634	0.372	0.00213623	mm10-Atg7
7.1e-08	-0.287204	0.261	0.483	0.00220551	mm10-Clcn7
7.27e-08	-0.139933	0.034	0.2	0.00225642	mm10-E430024P14Rik
7.52e-08	-0.350751	0.361	0.539	0.0023342	mm10-Ythdf1
7.55e-08	-0.229347	0.992	0.994	0.00234459	mm10-Slfn1
7.6e-08	0.219903	1	1	0.00236119	mm10-Rnf149
7.69e-08	0.202735	0.492	0.222	0.00238804	mm10-Timm8b
7.8e-08	0.194999	0.992	1	0.00242366	mm10-Entpd1
8.1e-08	-0.265347	0.197	0.411	0.00251396	mm10-Tmem2
8.19e-08	-0.346288	0.504	0.744	0.0025446	mm10-Plk2
8.28e-08	0.242706	0.735	0.472	0.00257144	mm10-Mob4
8.7e-08	0.243715	0.689	0.422	0.00270052	mm10-Hnrnpa0
8.74e-08	0.254319	0.605	0.339	0.00271471	mm10-Blcap
8.99e-08	-0.248634	0.113	0.333	0.00279036	mm10-Perm1
9.07e-08	0.258397	0.987	0.944	0.00281783	mm10-March7
9.19e-08	0.902212	0.84	0.867	0.00285377	mm10-mt-Cytb
9.8e-08	0.246299	0.765	0.511	0.00304431	mm10-Dph3
9.87e-08	0.132115	0.29	0.078	0.00306667	mm10-Trappc4
9.9e-08	0.331731	0.845	0.672	0.0030759	mm10-Pygl
9.92e-08	0.266629	0.824	0.6	0.00308109	mm10-Rps6
1.01e-07	0.316338	0.651	0.422	0.00313209	mm10-Msl2
1.01e-07	-0.263651	0.437	0.644	0.00313462	mm10-Rhox8
1.05e-07	0.0989537	0.139	0.006	0.00325951	mm10-Rrp1b
1.05e-07	0.139828	0.387	0.144	0.00326881	mm10-Ctdsp1
1.05e-07	0.706405	0.538	0.461	0.00327026	mm10-mt-Nd5
1.09e-07	0.252971	0.903	0.767	0.00339266	mm10-Elob
1.1e-07	0.29493	0.626	0.378	0.00342464	mm10-Pbxip1
1.1e-07	0.29288	0.882	0.761	0.00343151	mm10-Rpl26
1.12e-07	-0.306024	0.966	0.994	0.00347984	mm10-Tax1bp1
1.14e-07	-0.224801	0.122	0.294	0.00353209	mm10-Fzd5
1.14e-07	-0.40975	0.924	0.983	0.00354353	mm10-Ppp1r15a
1.14e-07	0.32065	0.962	0.839	0.00354649	mm10-H2-Q10
1.18e-07	-0.372193	0.996	1	0.00364988	mm10-Nfkbia
1.19e-07	0.281039	0.639	0.394	0.00368744	mm10-Wapl
1.21e-07	0.321274	0.971	0.894	0.00374413	mm10-Rbpj
1.22e-07	0.210667	0.66	0.383	0.00377903	mm10-Vsir
1.23e-07	0.220016	0.962	0.95	0.00382213	mm10-Oaz1
1.35e-07	0.265025	0.832	0.644	0.00418441	mm10-Supt4a
1.37e-07	0.331979	0.765	0.611	0.00426468	mm10-Sh2b2
1.38e-07	0.152027	0.349	0.117	0.00429542	mm10-Snx6
1.42e-07	-0.120768	0.021	0.172	0.00441939	mm10-Tfec
1.47e-07	-0.267321	0.059	0.222	0.004552	mm10-Ncoa7
1.47e-07	-0.293529	0.546	0.667	0.00457449	mm10-Jpt1
1.5e-07	-0.20166	0.424	0.539	0.00466525	mm10-Nod2
1.53e-07	0.247866	0.681	0.411	0.00476503	mm10-Slc25a37
1.54e-07	-0.255349	0.735	0.817	0.00478392	mm10-Oas1a
1.6e-07	0.286979	0.466	0.211	0.00496326	mm10-Kif5b
1.61e-07	0.0851711	0.151	0.011	0.00500501	mm10-Comtd1
1.63e-07	0.329141	0.761	0.589	0.00507132	mm10-Creg1
1.67e-07	0.18769	0.336	0.111	0.00519712	mm10-Tmco6
1.77e-07	0.307777	0.618	0.356	0.0054881	mm10-Rpsa
1.77e-07	0.209786	0.702	0.433	0.00550065	mm10-Gm20406
1.81e-07	0.215644	0.399	0.161	0.00562609	mm10-Man1b1
1.82e-07	0.281705	0.693	0.472	0.00563901	mm10-Atf1
1.83e-07	-0.331139	0.332	0.556	0.00568179	mm10-Plscr1
1.88e-07	0.247023	0.954	0.861	0.00582751	mm10-Itgal
1.89e-07	0.239684	0.349	0.128	0.0058662	mm10-Srxn1
1.91e-07	-0.30321	0.857	0.95	0.00592538	mm10-Gm13822
1.91e-07	0.126528	0.319	0.106	0.00593416	mm10-Mfap1a
1.97e-07	-0.312686	0.849	0.861	0.00613029	mm10-Cass4
1.98e-07	-0.376992	0.513	0.711	0.0061536	mm10-Creb5
1.98e-07	0.276179	0.58	0.311	0.00615885	mm10-Rps18
1.99e-07	0.211118	0.983	0.872	0.00616506	mm10-Atp6v1g1
2.05e-07	0.203702	0.42	0.172	0.00635179	mm10-Srrd
2.15e-07	0.149836	0.286	0.078	0.00668595	mm10-Rpl3l
2.24e-07	0.32842	0.597	0.328	0.00695238	mm10-Ero1l
2.27e-07	0.250411	0.924	0.844	0.0070555	mm10-Sbno1
2.31e-07	-0.157395	0.084	0.289	0.00715916	mm10-Med17
2.33e-07	0.232803	0.45	0.2	0.00723866	mm10-Adgrg3
2.34e-07	0.26762	0.836	0.678	0.00728104	mm10-Anxa11
2.42e-07	0.137893	1	1	0.00750383	mm10-Malat1
2.42e-07	0.159256	0.517	0.256	0.00752445	mm10-Phyh
2.43e-07	0.567166	0.408	0.211	0.00755197	mm10-mt-Nd4l
2.43e-07	0.270332	0.441	0.211	0.00755944	mm10-Zfyve26
2.46e-07	-0.310365	0.534	0.672	0.00764426	mm10-B4galt3
2.65e-07	0.262333	0.462	0.217	0.00823835	mm10-Cdkn1b
2.68e-07	0.250597	0.987	0.989	0.00833173	mm10-Ncf2
2.69e-07	-0.316144	0.046	0.222	0.00833964	mm10-Iigp1
2.69e-07	0.255081	0.618	0.367	0.00835973	mm10-Rab6a
2.69e-07	0.307006	0.479	0.228	0.00835998	mm10-Tnfaip8
2.81e-07	0.141447	0.403	0.167	0.00871727	mm10-Timm17b
2.89e-07	-0.0979334	0.008	0.128	0.00896345	mm10-Mtfr2
2.89e-07	-0.280695	0.954	0.983	0.00897578	mm10-Cd47
2.98e-07	-0.305836	0.748	0.906	0.00925325	mm10-Ifitm6
2.98e-07	-0.461003	0.718	0.728	0.00925472	mm10-Dhx40
2.99e-07	-0.108808	0.017	0.15	0.00928951	mm10-Olfr1395
3.01e-07	-0.29838	0.912	0.95	0.00933944	mm10-Mpeg1
3.08e-07	0.306215	0.71	0.461	0.0095634	mm10-Rps19
3.15e-07	0.279265	0.681	0.472	0.00977448	mm10-BC031181
3.25e-07	0.245876	0.475	0.228	0.0100791	mm10-Cep83
3.29e-07	-0.408045	0.92	0.978	0.010226	mm10-Tnfaip3
3.4e-07	0.201513	0.525	0.267	0.0105724	mm10-Was
3.42e-07	0.12206	0.269	0.072	0.0106174	mm10-Brd1
3.5e-07	0.289106	0.849	0.644	0.0108601	mm10-Rock1
3.6e-07	0.24632	0.609	0.361	0.0111883	mm10-Aldh2
3.6e-07	0.193372	0.416	0.172	0.011191	mm10-Kmt5b
3.71e-07	0.242508	0.845	0.667	0.011507	mm10-Cd37
3.71e-07	-0.150746	0.063	0.211	0.0115219	mm10-Esr1
3.82e-07	0.303817	0.752	0.533	0.0118546	mm10-Ralgapa1
3.83e-07	0.27866	0.664	0.406	0.0119028	mm10-Bnip3l
3.87e-07	0.237711	0.643	0.378	0.0120303	mm10-Rhov
3.88e-07	0.0652417	0.097	0	0.0120497	mm10-Hbb-bt
3.9e-07	-0.173304	0.252	0.489	0.012117	mm10-H2-Ab1
3.94e-07	-0.288048	0.832	0.928	0.0122422	mm10-Mafk
4.09e-07	0.248856	0.718	0.5	0.0126896	mm10-Uba52
4.34e-07	-0.155893	0.029	0.183	0.0134733	mm10-Cpeb3
4.4e-07	-0.256247	0.273	0.422	0.0136587	mm10-Tgif2
4.4e-07	0.281075	0.971	0.906	0.0136724	mm10-Sgms2
4.45e-07	0.251625	0.958	0.922	0.0138258	mm10-Arhgdib
4.5e-07	0.254518	0.794	0.589	0.0139776	mm10-Rtf2
4.63e-07	0.321416	0.773	0.639	0.0143775	mm10-Kdm7a
4.65e-07	0.147883	0.277	0.078	0.0144355	mm10-4732440D04Rik
4.97e-07	-0.0938753	0.008	0.128	0.015419	mm10-Mrc1
4.98e-07	0.108826	0.269	0.083	0.0154581	mm10-Gtf2e2
5.05e-07	0.297517	0.345	0.128	0.0156783	mm10-Mat2b
5.06e-07	0.300777	0.929	0.867	0.0157007	mm10-Selplg
5.16e-07	-0.263363	0.655	0.722	0.0160363	mm10-Crebrf
5.27e-07	0.246404	0.626	0.367	0.0163513	mm10-Pira2
5.33e-07	0.267514	0.748	0.517	0.016539	mm10-Mef2a
5.69e-07	0.234783	0.471	0.233	0.0176699	mm10-Uqcr10
5.79e-07	0.112242	0.218	0.044	0.0179901	mm10-Gps2
5.82e-07	0.210705	0.45	0.206	0.0180769	mm10-Pold4
6.09e-07	-0.172515	0.013	0.139	0.0188979	mm10-Dab2
6.21e-07	-0.290133	0.752	0.85	0.0192979	mm10-Pilrb1
6.34e-07	-0.065448	0	0.083	0.0196918	mm10-Flrt3
6.48e-07	0.239265	0.647	0.406	0.02012	mm10-Ythdf3
6.51e-07	-0.22777	0.286	0.478	0.020202	mm10-2610507B11Rik
6.54e-07	0.0871645	0.122	0.006	0.0203128	mm10-Hba-a1
6.65e-07	-0.269593	0.861	0.922	0.0206641	mm10-Epsti1
6.66e-07	-0.541591	0.487	0.633	0.0206768	mm10-Chka
6.83e-07	0.184095	0.387	0.156	0.0211954	mm10-Ing4
6.94e-07	-0.299459	0.748	0.772	0.0215543	mm10-Ddit3
7.04e-07	0.181299	0.391	0.161	0.0218504	mm10-Slc12a6
7.11e-07	0.194073	0.437	0.194	0.022067	mm10-Cd101
7.18e-07	-0.227381	0.345	0.533	0.0222932	mm10-Psme4
7.19e-07	0.231952	0.534	0.289	0.0223308	mm10-Hpcal1
7.72e-07	0.253584	0.924	0.828	0.023963	mm10-Fem1c
7.78e-07	-0.162305	0.063	0.228	0.0241685	mm10-C2cd3
7.82e-07	0.19559	0.731	0.478	0.0242794	mm10-Rab11a
8.06e-07	0.107041	0.227	0.05	0.0250285	mm10-Cenpb
8.22e-07	-0.298512	0.702	0.756	0.0255404	mm10-Vav1
8.49e-07	0.383607	0.748	0.583	0.0263618	mm10-Gadd45a
8.65e-07	-0.179354	0.101	0.289	0.026859	mm10-Ppm1k
8.66e-07	0.239566	0.798	0.683	0.0269	mm10-Ssu72
8.7e-07	0.254865	0.983	0.917	0.02701	mm10-Calm1
9.05e-07	0.0991082	0.193	0.033	0.0281141	mm10-Mrps33
9.06e-07	0.224948	0.929	0.778	0.028146	mm10-Rplp0
9.21e-07	0.220094	0.983	0.983	0.0285899	mm10-Taldo1
9.55e-07	-0.44628	0.571	0.683	0.029653	mm10-Slc20a1
9.58e-07	0.261306	0.647	0.45	0.0297521	mm10-Ppp2r5a
9.67e-07	-0.291413	0.391	0.556	0.0300384	mm10-Trim5
9.85e-07	0.198303	0.361	0.139	0.0305842	mm10-Runx2
1e-06	0.246378	0.693	0.456	0.0312028	mm10-Atp5j2
1.02e-06	-0.147215	0.042	0.189	0.0316931	mm10-Timm29
1.05e-06	0.145462	0.294	0.094	0.0327389	mm10-Pacsin2
1.06e-06	0.244036	0.668	0.428	0.0328174	mm10-R3hdm2
1.06e-06	0.221674	0.685	0.444	0.0328458	mm10-Ccdc12
1.07e-06	0.249623	0.803	0.589	0.0331052	mm10-Pten
1.07e-06	0.390089	0.66	0.433	0.0331846	mm10-Pfkfb3
1.08e-06	0.441861	0.643	0.433	0.0334024	mm10-Dusp6
1.11e-06	0.278295	0.87	0.733	0.0346014	mm10-Braf
1.12e-06	0.163628	0.571	0.317	0.0348834	mm10-Ap3s1
1.14e-06	-0.122544	0.025	0.167	0.0353383	mm10-Ift80
1.15e-06	0.267459	0.723	0.5	0.0357774	mm10-Tcf25
1.17e-06	0.246973	0.95	0.861	0.0362009	mm10-Ube2b
1.18e-06	0.183542	0.517	0.267	0.0366267	mm10-Pdzd8
1.19e-06	0.127536	0.336	0.128	0.036812	mm10-Sdhd
1.23e-06	-0.283137	0.887	0.933	0.0381918	mm10-Psmb9
1.24e-06	-0.169052	0.092	0.25	0.038537	mm10-Rmdn3
1.25e-06	0.697795	0.685	0.617	0.0387724	mm10-mt-Nd1
1.26e-06	0.20884	0.513	0.267	0.0391064	mm10-Naca
1.26e-06	0.212233	0.513	0.278	0.039115	mm10-Preb
1.27e-06	0.233611	0.462	0.222	0.0395081	mm10-Slk
1.29e-06	0.270326	0.803	0.594	0.0399144	mm10-Itpkb
1.3e-06	-0.150229	0.071	0.25	0.0403135	mm10-Lrp1
1.31e-06	0.0825883	0.21	0.05	0.0406444	mm10-Rpl7l1
1.34e-06	-0.109374	0.013	0.133	0.0415606	mm10-Gatm
1.35e-06	0.225894	0.861	0.722	0.0417935	mm10-Tomm7
1.36e-06	0.180975	0.437	0.2	0.042106	mm10-Sipa1l2
1.36e-06	-0.35927	0.828	0.911	0.04217	mm10-Rsrp1
1.41e-06	0.242702	0.845	0.644	0.043904	mm10-Adprh
1.45e-06	-0.165588	0.08	0.211	0.0451151	mm10-Mepce
1.45e-06	0.24825	0.542	0.3	0.0451266	mm10-Fam110a
1.47e-06	-0.261318	0.382	0.606	0.0457236	mm10-Apaf1
1.48e-06	0.289237	0.504	0.283	0.0459672	mm10-Dstn
1.52e-06	0.183578	0.437	0.2	0.0473321	mm10-Ddx50
1.53e-06	0.184942	0.395	0.167	0.047425	mm10-St3gal5
1.56e-06	0.130513	0.399	0.178	0.0485877	mm10-Kcmf1
1.57e-06	0.170654	0.332	0.122	0.0486048	mm10-Cul1
1.57e-06	0.209045	0.529	0.283	0.0486815	mm10-Ralb
1.6e-06	0.0520889	0.282	0.117	0.0496861	mm10-Srf
1.63e-06	0.178849	0.752	0.511	0.0504788	mm10-Vapa
1.65e-06	0.208116	0.525	0.294	0.051236	mm10-Rpl13a
1.71e-06	-0.238172	0.433	0.55	0.0531941	mm10-Sgk3
1.73e-06	0.212314	0.622	0.372	0.0538661	mm10-Rpl12
1.74e-06	0.163078	0.357	0.139	0.0541418	mm10-Arl11
1.78e-06	-0.235201	0.538	0.683	0.0551323	mm10-Rnf167
1.79e-06	0.10482	0.164	0.022	0.0556484	mm10-Smpd5
1.8e-06	-0.31353	0.261	0.478	0.0560342	mm10-Fmnl2
1.84e-06	0.287405	0.752	0.55	0.0572192	mm10-Rpl6
1.84e-06	0.309326	0.887	0.767	0.0572811	mm10-Irf2bp2
1.9e-06	-0.306219	0.378	0.506	0.0589931	mm10-Phip
1.94e-06	0.172201	0.441	0.206	0.0602166	mm10-Zfp638
1.98e-06	0.209519	0.479	0.239	0.0614219	mm10-Magoh
1.98e-06	-0.147927	0.034	0.172	0.0614629	mm10-Ripk2
2.02e-06	0.137948	0.353	0.139	0.062654	mm10-Rapgef1
2.02e-06	-0.237553	0.382	0.533	0.0627736	mm10-Pank2
2.05e-06	0.25171	0.878	0.706	0.0637635	mm10-Cox4i1
2.17e-06	0.166606	0.454	0.217	0.0673956	mm10-Stxbp2
2.19e-06	0.2223	0.66	0.433	0.0679286	mm10-Bbip1
2.19e-06	0.119696	0.311	0.111	0.0680961	mm10-Ndufs6
2.2e-06	0.0969704	0.311	0.122	0.0684277	mm10-Eif4e
2.23e-06	-0.358339	0.239	0.422	0.0693751	mm10-Rasgef1b
2.25e-06	-0.306058	0.962	0.978	0.069728	mm10-Ptpn1
2.26e-06	0.253141	0.592	0.356	0.0701798	mm10-Tmcc1
2.29e-06	0.161292	0.361	0.144	0.0711627	mm10-Ppp2r2d
2.32e-06	0.269779	0.643	0.417	0.072183	mm10-Rin3
2.33e-06	0.186933	0.529	0.283	0.0722956	mm10-Stk38
2.34e-06	-0.270486	0.408	0.611	0.0727006	mm10-Sh3bp2
2.39e-06	0.209409	0.483	0.244	0.0741644	mm10-Chmp3
2.41e-06	0.154116	0.315	0.111	0.0747504	mm10-Zfp652
2.44e-06	-0.197122	0.168	0.333	0.0758188	mm10-Trp53inp1
2.45e-06	-0.323261	0.945	0.967	0.0760964	mm10-Tra2a
2.45e-06	0.170366	0.319	0.117	0.0761256	mm10-Rnf141
2.46e-06	-0.18341	0.059	0.211	0.0763531	mm10-Polg2
2.55e-06	0.233162	0.538	0.317	0.0793321	mm10-Arrb2
2.61e-06	-0.165578	0.147	0.344	0.0810469	mm10-Med12l
2.65e-06	0.151623	0.353	0.139	0.0824172	mm10-Cope
2.69e-06	0.248636	0.794	0.628	0.083563	mm10-Snx3
2.71e-06	0.252331	0.756	0.539	0.0842697	mm10-Wac
2.74e-06	0.188482	0.433	0.206	0.0850834	mm10-Atp5d
2.75e-06	0.257609	0.71	0.494	0.0855304	mm10-Mthfs
2.76e-06	0.349081	0.954	0.872	0.0857516	mm10-Cdk2ap2
2.78e-06	0.0708889	0.357	0.172	0.0862151	mm10-Hmgcr
2.78e-06	0.17321	0.294	0.1	0.086312	mm10-Nars
2.85e-06	-0.29881	0.462	0.6	0.0884457	mm10-Mbnl1
2.89e-06	-0.278811	0.542	0.711	0.0897053	mm10-I830077J02Rik
2.92e-06	-0.0792977	0.034	0.178	0.0905688	mm10-Mafb
2.92e-06	-0.308292	0.761	0.894	0.0907421	mm10-Mapk6
3.01e-06	0.16099	0.328	0.122	0.0934872	mm10-Med14
3.05e-06	-0.211336	0.261	0.489	0.0946609	mm10-H2-Aa
3.06e-06	0.220927	0.391	0.178	0.0951667	mm10-AI839979
3.09e-06	0.207536	0.807	0.583	0.0961151	mm10-Ago2
3.16e-06	0.18433	0.58	0.333	0.0980379	mm10-Cab39
3.16e-06	0.237835	0.958	0.861	0.0981285	mm10-Slc3a2
3.18e-06	0.182974	0.332	0.133	0.0988921	mm10-Mbp
3.2e-06	-0.182256	0.13	0.289	0.0993574	mm10-Plod3
3.3e-06	0.239818	0.66	0.456	0.102346	mm10-Atp5j
3.31e-06	0.112198	0.244	0.067	0.102808	mm10-U2af1
3.31e-06	0.23894	0.592	0.356	0.102868	mm10-Rps4x
3.32e-06	-0.218403	0.731	0.789	0.102974	mm10-Mvp
3.32e-06	0.125898	0.143	0.017	0.102978	mm10-Rdh11
3.33e-06	0.247561	0.613	0.383	0.103444	mm10-Lilra6
3.36e-06	0.254257	0.634	0.4	0.104384	mm10-Fam76a
3.42e-06	0.199741	0.769	0.539	0.106167	mm10-Ndufa13
3.44e-06	0.266631	0.702	0.489	0.10688	mm10-Cox7c
3.47e-06	0.158589	0.34	0.133	0.107707	mm10-Sec16a
3.57e-06	0.101436	0.181	0.033	0.110973	mm10-Phf14
3.61e-06	0.269762	0.714	0.506	0.111972	mm10-Il6ra
3.61e-06	0.197755	0.601	0.356	0.112209	mm10-Srsf11
3.62e-06	0.0839933	0.13	0.011	0.112329	mm10-Tmc8
3.62e-06	0.150614	0.387	0.167	0.112448	mm10-Rap1gap2
3.71e-06	-0.186242	0.353	0.467	0.115323	mm10-Crybg1
3.72e-06	-0.261056	0.462	0.633	0.115422	mm10-Upf2
3.73e-06	0.221681	0.471	0.244	0.115924	mm10-Foxn2
3.74e-06	-0.125998	0.021	0.128	0.116158	mm10-Icam5
3.77e-06	-0.415377	0.664	0.817	0.116958	mm10-F3
3.78e-06	-0.254878	0.382	0.489	0.117406	mm10-Tpp2
3.82e-06	0.140763	0.723	0.483	0.118516	mm10-Phlda1
3.84e-06	0.214693	0.63	0.4	0.119237	mm10-Atp5h
3.84e-06	-0.173663	0.038	0.183	0.119262	mm10-Slamf7
3.91e-06	-0.0796125	0.004	0.1	0.121501	mm10-Sema4f
3.96e-06	-0.0562556	0	0.072	0.12286	mm10-Ccl24
3.96e-06	-0.0566986	0	0.072	0.12286	mm10-Zfp446
4.02e-06	0.120474	0.265	0.083	0.124763	mm10-Irak1
4.14e-06	0.176645	0.529	0.289	0.128639	mm10-Ube2j1
4.21e-06	0.151795	0.307	0.111	0.130679	mm10-Map3k14
4.24e-06	0.192467	0.315	0.117	0.131531	mm10-Crebl2
4.28e-06	0.126896	0.445	0.222	0.132962	mm10-Rnf111
4.4e-06	0.2496	0.84	0.756	0.136522	mm10-Rps7
4.42e-06	0.167589	0.958	0.917	0.137329	mm10-Cyp4f18
4.46e-06	0.26458	0.84	0.672	0.138478	mm10-Rps15a
4.52e-06	-0.298741	0.071	0.211	0.140519	mm10-Nrg1
4.58e-06	0.175073	0.294	0.106	0.142281	mm10-Snx14
4.63e-06	0.27563	0.941	0.867	0.143924	mm10-Ankrd33b
4.64e-06	0.267876	0.887	0.728	0.144103	mm10-Jmjd1c
4.66e-06	0.184992	0.58	0.339	0.144824	mm10-Cnih4
4.66e-06	0.770777	0.71	0.622	0.14485	mm10-mt-Nd2
4.74e-06	0.257143	0.739	0.528	0.14735	mm10-Ifi27
4.78e-06	0.187959	0.416	0.194	0.148367	mm10-Agpat4
4.78e-06	-0.28615	0.492	0.667	0.148519	mm10-Gm46224
4.84e-06	0.247296	0.849	0.689	0.15042	mm10-Zfp106
4.85e-06	0.0904954	0.176	0.033	0.150516	mm10-Fam220a
4.95e-06	-0.258731	0.786	0.878	0.15372	mm10-Sertad1
5.03e-06	0.197704	0.958	0.894	0.156229	mm10-Ubl5
5.12e-06	0.275189	0.744	0.528	0.159111	mm10-Eea1
5.29e-06	0.220435	0.702	0.483	0.164207	mm10-Mboat7
5.52e-06	0.104413	0.29	0.106	0.171432	mm10-Sel1l
5.53e-06	0.11694	0.282	0.094	0.171607	mm10-Mdm4
5.58e-06	-0.283394	0.899	0.944	0.173326	mm10-Cflar
5.63e-06	0.114809	0.29	0.1	0.174839	mm10-Hint1
5.69e-06	0.121463	0.189	0.039	0.176651	mm10-Sema6b
5.72e-06	0.133939	0.408	0.194	0.177738	mm10-Atxn10
5.73e-06	0.124338	0.441	0.222	0.177905	mm10-Kansl1
5.76e-06	-0.218734	0.857	0.944	0.179017	mm10-Rhbdf2
6.06e-06	0.131816	0.273	0.089	0.188298	mm10-Ramp1
6.09e-06	-0.216862	0.21	0.417	0.189093	mm10-Tgtp1
6.18e-06	0.238426	0.668	0.444	0.192	mm10-Rab14
6.29e-06	-0.149939	0.076	0.228	0.195253	mm10-2010111I01Rik
6.32e-06	0.283125	0.744	0.611	0.196153	mm10-Ifngr2
6.35e-06	-0.236776	0.903	0.906	0.197072	mm10-Zfp281
6.39e-06	0.169226	0.487	0.256	0.198569	mm10-Col4a3bp
6.43e-06	0.081687	0.214	0.061	0.199639	mm10-5430425K12Rik
6.49e-06	-0.37565	0.693	0.722	0.201564	mm10-Dedd2
6.54e-06	0.101369	0.231	0.067	0.203254	mm10-Entpd3
6.63e-06	0.214928	0.445	0.239	0.205764	mm10-Agap1
6.66e-06	0.0926186	0.244	0.078	0.20681	mm10-Ppil4
6.8e-06	0.368429	0.689	0.478	0.21119	mm10-Zfp36l2
6.82e-06	0.170349	0.387	0.172	0.211831	mm10-Rnf20
6.83e-06	0.171575	0.622	0.383	0.212152	mm10-Ndufa1
6.9e-06	-0.185415	0.046	0.183	0.214245	mm10-Hspa2
6.94e-06	-0.260052	0.937	0.95	0.215587	mm10-Tmed5
7.01e-06	0.194095	0.277	0.094	0.217767	mm10-Crispld2
7.07e-06	0.204524	0.475	0.261	0.219692	mm10-Rpl4
7.13e-06	-0.245923	0.298	0.472	0.221528	mm10-Acer3
7.29e-06	0.105814	0.176	0.033	0.226279	mm10-Dctpp1
7.33e-06	0.221661	0.924	0.9	0.227518	mm10-Pilra
7.47e-06	0.204803	0.84	0.678	0.232072	mm10-Btf3
7.53e-06	0.106342	0.256	0.094	0.233893	mm10-Gm43660
7.6e-06	0.197523	0.819	0.617	0.236036	mm10-Zfand3
7.82e-06	0.132586	0.303	0.111	0.242837	mm10-Vamp5
7.88e-06	0.382171	0.71	0.511	0.244831	mm10-Hspa4l
7.99e-06	0.208911	0.664	0.433	0.248019	mm10-Gabarapl2
8.07e-06	0.194722	0.559	0.333	0.250489	mm10-Cox7a2l
8.07e-06	0.261298	0.534	0.3	0.250563	mm10-Egr3
8.23e-06	-0.12274	0.025	0.139	0.255586	mm10-Soga1
8.5e-06	0.158254	0.298	0.111	0.263925	mm10-Mindy1
8.64e-06	0.137834	0.332	0.133	0.268163	mm10-Hook3
8.65e-06	0.0705847	0.076	0	0.268653	mm10-Tbc1d4
8.69e-06	0.117559	0.244	0.072	0.269763	mm10-Dlst
8.71e-06	-0.185885	0.151	0.278	0.27057	mm10-Abl2
8.73e-06	0.155801	0.34	0.139	0.27121	mm10-Ndufb4
8.74e-06	-0.2669	0.298	0.456	0.271363	mm10-Etv3
8.77e-06	0.222119	0.483	0.261	0.272202	mm10-Mafg
8.82e-06	0.0605695	0.227	0.083	0.273913	mm10-Dpp8
9.13e-06	0.167807	0.445	0.222	0.283411	mm10-Nrbf2
9.43e-06	0.140511	0.483	0.256	0.292709	mm10-Acap1
9.59e-06	0.111127	0.277	0.094	0.297713	mm10-Vti1b
9.6e-06	0.230553	0.752	0.572	0.298033	mm10-Gnb1
9.6e-06	-0.162523	0.239	0.35	0.298078	mm10-Ociad1
9.6e-06	-0.227292	0.361	0.522	0.298114	mm10-Nipa2
9.66e-06	-0.188003	0.164	0.306	0.30006	mm10-Mcm10
9.68e-06	0.194863	0.639	0.406	0.300629	mm10-Atp5b
9.86e-06	-0.0481567	0	0.067	0.306164	mm10-Kdr
9.96e-06	0.115252	0.193	0.044	0.309401	mm10-Cdc25b
1.02e-05	0.167535	0.403	0.189	0.316201	mm10-Nudt18
1.03e-05	0.21907	0.735	0.533	0.318479	mm10-Pstpip1
1.03e-05	0.127124	0.345	0.144	0.318634	mm10-Zcchc7
1.03e-05	0.442791	0.601	0.483	0.31877	mm10-mt-Nd3
1.03e-05	-0.320181	0.298	0.383	0.319824	mm10-G3bp1
1.04e-05	-0.202886	0.315	0.489	0.322903	mm10-Rap1gds1
1.06e-05	0.157335	0.676	0.444	0.328605	mm10-Yme1l1
1.07e-05	0.0594527	0.105	0.006	0.331236	mm10-Marveld2
1.07e-05	0.894491	0.975	1	0.331421	mm10-mt-Co3
1.08e-05	0.193824	0.45	0.233	0.335312	mm10-Cln5
1.09e-05	-0.180456	0.874	0.978	0.340052	mm10-Ascc3
1.14e-05	0.0549722	0.151	0.028	0.354471	mm10-Ralgps1
1.16e-05	-0.229741	0.471	0.622	0.361739	mm10-Mrpl30
1.19e-05	-0.331904	0.525	0.578	0.370506	mm10-Cycs
1.21e-05	0.18511	0.567	0.35	0.375111	mm10-Pkn1
1.21e-05	-0.184823	0.164	0.35	0.375536	mm10-Lgals3bp
1.22e-05	0.390634	0.79	0.644	0.377791	mm10-Zfp36l1
1.23e-05	0.11471	0.21	0.056	0.38058	mm10-Nmrk1
1.23e-05	-0.16651	0.092	0.25	0.381405	mm10-Pecam1
1.23e-05	-0.224065	0.298	0.5	0.381776	mm10-Ccdc86
1.23e-05	-0.158456	0.244	0.344	0.382213	mm10-Fryl
1.23e-05	0.280507	0.861	0.75	0.382612	mm10-Il17ra
1.23e-05	0.145731	0.315	0.122	0.382869	mm10-Lrrc58
1.25e-05	0.311322	0.832	0.656	0.389573	mm10-Cd63
1.27e-05	-0.223696	0.475	0.611	0.394342	mm10-Nono
1.29e-05	0.207188	0.857	0.722	0.401535	mm10-Cox5b
1.31e-05	0.0892474	0.332	0.15	0.405856	mm10-Icosl
1.32e-05	0.100629	0.277	0.106	0.408619	mm10-Lsm12
1.32e-05	-0.161521	0.151	0.311	0.409825	mm10-Slc45a4
1.32e-05	-0.263307	0.311	0.417	0.411451	mm10-Gpr141
1.33e-05	0.247802	0.706	0.522	0.412444	mm10-Ptpn18
1.33e-05	0.180445	0.605	0.372	0.414014	mm10-Padi4
1.33e-05	-0.196216	0.328	0.506	0.41404	mm10-9330175E14Rik
1.34e-05	0.224127	0.609	0.389	0.416921	mm10-Fbxl3
1.35e-05	0.203649	0.605	0.372	0.418038	mm10-Dgkz
1.35e-05	0.217659	0.857	0.7	0.419674	mm10-Dock2
1.36e-05	0.18595	0.487	0.283	0.421665	mm10-Atp5c1
1.36e-05	1.03892	0.962	0.983	0.423513	mm10-mt-Atp6
1.37e-05	0.171787	0.433	0.222	0.426555	mm10-Ssr4
1.4e-05	0.103774	0.37	0.178	0.435635	mm10-Mapk14
1.4e-05	-0.241735	0.487	0.644	0.435643	mm10-Rffl
1.42e-05	0.166081	0.782	0.567	0.441763	mm10-St3gal6
1.44e-05	-0.0247598	0.139	0.089	0.446087	mm10-Fbxl14
1.45e-05	0.143209	0.454	0.233	0.450524	mm10-Nrbp1
1.48e-05	0.212974	0.555	0.328	0.458073	mm10-Gramd1a
1.48e-05	-0.149356	0.025	0.133	0.459905	mm10-Clic5
1.48e-05	0.128963	0.328	0.133	0.461142	mm10-Prpf6
1.49e-05	-0.277675	0.5	0.644	0.46206	mm10-Foxp1
1.49e-05	-0.217527	0.374	0.494	0.46282	mm10-Arnt
1.51e-05	-0.190602	0.122	0.283	0.469213	mm10-Adam9
1.52e-05	0.126463	0.319	0.128	0.471654	mm10-Tmc6
1.54e-05	-0.150888	0.063	0.211	0.479741	mm10-Mx1
1.55e-05	0.126638	0.492	0.272	0.481509	mm10-Camk1d
1.59e-05	0.132548	0.429	0.217	0.492747	mm10-Sfxn5
1.59e-05	-0.0911895	0.017	0.128	0.492926	mm10-Smc5
1.59e-05	0.237249	0.475	0.278	0.493341	mm10-Smarca5
1.6e-05	0.164806	0.378	0.172	0.496242	mm10-Setd2
1.61e-05	0.129798	0.357	0.156	0.499141	mm10-Mob3a
1.61e-05	0.20709	0.643	0.417	0.499603	mm10-R3hdm4
1.61e-05	0.21284	0.681	0.456	0.501424	mm10-Cnn2
1.62e-05	0.292359	0.987	0.989	0.50317	mm10-Plaur
1.63e-05	0.103287	0.588	0.367	0.505407	mm10-Ube2a
1.63e-05	0.144241	0.357	0.156	0.507541	mm10-Rnaseh2c
1.64e-05	-0.363421	0.45	0.506	0.510609	mm10-Clec12a
1.73e-05	-0.22917	0.954	0.95	0.536919	mm10-Irak2
1.73e-05	0.233274	0.622	0.4	0.537398	mm10-Cisd2
1.73e-05	0.216562	0.752	0.572	0.537618	mm10-Prrc2c
1.75e-05	0.0854273	0.311	0.139	0.541913	mm10-Mark3
1.76e-05	0.164996	0.445	0.228	0.545763	mm10-Bnip2
1.78e-05	0.224802	0.903	0.761	0.553246	mm10-Fam49b
1.88e-05	0.194392	0.756	0.55	0.583903	mm10-Psenen
1.89e-05	0.232612	0.584	0.367	0.587285	mm10-Impact
1.9e-05	0.0423612	0.235	0.106	0.588828	mm10-Mvb12b
1.91e-05	0.158807	1	0.95	0.592641	mm10-Kpna4
2e-05	0.151296	0.525	0.3	0.620184	mm10-Dnajc5
2e-05	-0.190652	0.735	0.644	0.622209	mm10-H2afz
2.06e-05	-0.160018	0.185	0.339	0.63938	mm10-Slc25a12
2.06e-05	-0.15622	0.143	0.267	0.639681	mm10-Cdc42bpg
2.07e-05	0.142164	1	1	0.644222	mm10-H3f3b
2.09e-05	-0.323712	0.975	0.994	0.648744	mm10-Ifitm1
2.1e-05	0.0647233	0.105	0.011	0.65283	mm10-Jade1
2.12e-05	0.417525	0.954	0.906	0.657965	mm10-Ptgs2
2.18e-05	0.205743	0.618	0.417	0.675972	mm10-Stag2
2.2e-05	0.124728	0.286	0.106	0.681713	mm10-Pdcl3
2.21e-05	-0.207958	0.294	0.439	0.685696	mm10-Rnf139
2.21e-05	0.745986	0.845	0.844	0.686826	mm10-mt-Nd4
2.22e-05	-0.167148	0.336	0.4	0.688318	mm10-Tspyl1
2.22e-05	0.145176	0.382	0.178	0.689873	mm10-Frg1
2.23e-05	0.218653	0.387	0.194	0.691253	mm10-Bptf
2.26e-05	0.102187	0.252	0.083	0.701498	mm10-Tmed9
2.26e-05	0.0760214	0.282	0.122	0.702003	mm10-Ccdc126
2.3e-05	-0.262751	0.983	0.967	0.714562	mm10-Tnrc6b
2.33e-05	0.115461	0.252	0.083	0.725011	mm10-Sos2
2.34e-05	0.192861	0.513	0.294	0.727331	mm10-Iscu
2.38e-05	0.0404997	0.361	0.206	0.737796	mm10-Cwc15
2.38e-05	0.155083	0.298	0.117	0.74028	mm10-Dock5
2.39e-05	-0.133693	0.05	0.183	0.742596	mm10-Clec4a1
2.4e-05	0.186667	0.496	0.289	0.745382	mm10-Usp8
2.41e-05	0.201313	0.786	0.589	0.747773	mm10-Ndufa3
2.42e-05	0.21469	0.542	0.328	0.753024	mm10-Kmt2c
2.43e-05	0.256635	0.824	0.683	0.753883	mm10-Gnai3
2.45e-05	-0.412651	0.958	0.972	0.760081	mm10-Egr1
2.46e-05	-0.175506	0.882	0.878	0.764417	mm10-Rab5c
2.48e-05	0.211842	0.845	0.733	0.769843	mm10-Arhgdia
2.53e-05	0.142958	0.387	0.183	0.785552	mm10-Pcif1
2.59e-05	-0.411699	0.113	0.261	0.804397	mm10-Ccl5
2.6e-05	-0.202733	0.983	0.994	0.807082	mm10-Actr2
2.61e-05	-0.355106	0.239	0.389	0.809165	mm10-Ints6
2.62e-05	0.195319	0.601	0.378	0.812541	mm10-Ankrd44
2.65e-05	0.259523	0.718	0.522	0.823483	mm10-Arl5b
2.66e-05	0.147728	0.504	0.283	0.825339	mm10-Edf1
2.75e-05	0.173237	0.668	0.444	0.8529	mm10-Mpc1
2.76e-05	-0.180995	0.134	0.283	0.856085	mm10-Cdt1
2.76e-05	-0.236638	0.92	0.961	0.857242	mm10-Il18rap
2.79e-05	0.211674	0.769	0.611	0.865184	mm10-Rps27rt
2.82e-05	0.131631	0.29	0.111	0.874763	mm10-Map3k15
2.83e-05	0.12123	0.542	0.322	0.877942	mm10-Tmem258
2.88e-05	0.353392	0.828	0.689	0.893588	mm10-Rgs2
2.95e-05	0.164459	0.58	0.356	0.914692	mm10-Prkcb
2.97e-05	0.0468789	0.067	0	0.922894	mm10-Gm11713
2.99e-05	0.223219	0.891	0.789	0.927609	mm10-Rab44
3.02e-05	0.221719	0.433	0.233	0.938392	mm10-Gfod1
3.04e-05	0.159927	0.55	0.328	0.9433	mm10-Tmem234
3.05e-05	0.219803	0.718	0.533	0.947552	mm10-Cript
3.1e-05	0.0761878	0.189	0.05	0.962718	mm10-Sike1
3.14e-05	-0.242112	0.756	0.8	0.974757	mm10-D16Ertd472e
3.17e-05	-0.0972997	0.05	0.183	0.983746	mm10-Lgals1
3.17e-05	0.189215	0.672	0.467	0.98557	mm10-Srp14
3.18e-05	0.0814171	0.139	0.022	0.987546	mm10-Acp1
3.24e-05	0.0289877	0.399	0.267	1	mm10-Szrd1
3.27e-05	0.11364	0.218	0.067	1	mm10-Fopnl
3.27e-05	0.157854	0.378	0.178	1	mm10-Macf1
3.29e-05	0.159121	0.37	0.178	1	mm10-Stim2
3.32e-05	0.141225	0.412	0.206	1	mm10-Parp4
3.32e-05	0.214334	0.676	0.478	1	mm10-Purb
3.32e-05	0.166394	0.538	0.317	1	mm10-Ier3ip1
3.43e-05	0.0485696	0.504	0.333	1	mm10-Epc1
3.45e-05	-0.208235	0.508	0.572	1	mm10-Atp2c1
3.45e-05	0.198307	0.975	0.972	1	mm10-Csf2ra
3.48e-05	0.143502	0.462	0.25	1	mm10-Sys1
3.48e-05	0.0484714	0.252	0.122	1	mm10-Cirbp
3.49e-05	-0.0629561	0.013	0.106	1	mm10-Gm17196
3.52e-05	0.208385	0.731	0.522	1	mm10-Ythdc1
3.55e-05	-0.0773474	0.004	0.083	1	mm10-Duoxa2
3.55e-05	0.0908698	0.151	0.028	1	mm10-Impa2
3.58e-05	0.214008	0.739	0.539	1	mm10-Rheb
3.61e-05	0.0889034	0.29	0.122	1	mm10-Mgrn1
3.7e-05	0.121026	0.836	0.644	1	mm10-Ypel3
3.75e-05	0.189317	0.282	0.111	1	mm10-Rpl10a
3.78e-05	0.0997259	0.429	0.228	1	mm10-Aup1
3.87e-05	0.0490698	0.088	0.006	1	mm10-Pdcd11
3.88e-05	0.188615	0.324	0.139	1	mm10-Sh3bp5
3.96e-05	0.134991	0.387	0.189	1	mm10-Nbeal1
4e-05	0.204903	0.584	0.372	1	mm10-Usp32
4.03e-05	-0.434929	0.261	0.356	1	mm10-Dnajb1
4.05e-05	0.135515	0.286	0.111	1	mm10-Swt1
4.07e-05	0.252511	0.714	0.572	1	mm10-Siglece
4.08e-05	-0.193321	0.206	0.361	1	mm10-9930111J21Rik1
4.08e-05	-0.106977	0.042	0.167	1	mm10-Mfsd12
4.12e-05	0.166341	0.63	0.411	1	mm10-Lrrfip2
4.14e-05	0.23708	0.929	0.867	1	mm10-Zyx
4.19e-05	0.145059	0.361	0.167	1	mm10-Rinl
4.2e-05	0.115373	0.353	0.167	1	mm10-Actr10
4.22e-05	0.168521	0.437	0.239	1	mm10-Cmtm7
4.22e-05	-0.554576	0.391	0.494	1	mm10-Gadd45g
4.24e-05	-0.168099	0.412	0.522	1	mm10-Lsm14a
4.27e-05	-0.175293	0.374	0.456	1	mm10-Ptpn23
4.49e-05	0.139927	0.164	0.039	1	mm10-Cdk5r1
4.5e-05	0.120016	0.433	0.233	1	mm10-Eif2s2
4.52e-05	0.073328	0.197	0.061	1	mm10-Ncbp3
4.53e-05	0.216031	0.971	0.928	1	mm10-Cst3
4.56e-05	0.200231	0.92	0.789	1	mm10-Bcl3
4.58e-05	-0.180295	0.248	0.389	1	mm10-Aph1c
4.69e-05	-0.214503	0.613	0.728	1	mm10-Chmp5
4.7e-05	0.119656	0.277	0.106	1	mm10-Anapc13
4.83e-05	0.0968177	0.227	0.072	1	mm10-Arhgap18
4.86e-05	-0.234428	1	0.944	1	mm10-Lars2
4.89e-05	0.160909	0.37	0.178	1	mm10-Eps15
4.9e-05	0.0834874	0.269	0.106	1	mm10-Mllt10
4.9e-05	0.257469	0.555	0.389	1	mm10-Map4k4
4.97e-05	0.212252	0.891	0.872	1	mm10-Nadk
5e-05	-0.262201	0.567	0.661	1	mm10-4930523C07Rik
5.06e-05	-0.214453	0.622	0.761	1	mm10-Ing3
5.29e-05	-0.175409	0.882	0.878	1	mm10-Lgals8
5.29e-05	-0.153439	0.206	0.35	1	mm10-4930599N23Rik
5.33e-05	0.133732	0.345	0.156	1	mm10-Map1lc3a
5.37e-05	0.107518	0.235	0.078	1	mm10-Tcea1
5.41e-05	0.114185	0.466	0.261	1	mm10-Capn1
5.42e-05	0.132393	0.399	0.2	1	mm10-Dock11
5.5e-05	0.0803545	0.311	0.144	1	mm10-Mif4gd
5.51e-05	-0.228281	0.42	0.572	1	mm10-Apobec1
5.51e-05	0.112339	0.441	0.244	1	mm10-Cpd
5.57e-05	0.132985	0.265	0.1	1	mm10-Taz
5.61e-05	0.0684281	0.109	0.011	1	mm10-6430531B16Rik
5.63e-05	-0.10647	0.126	0.2	1	mm10-Plpp5
5.63e-05	0.172201	0.584	0.367	1	mm10-Snrpc
5.63e-05	-0.192256	0.622	0.594	1	mm10-Gns
5.65e-05	-0.163167	0.702	0.706	1	mm10-Tank
5.74e-05	0.192623	0.496	0.289	1	mm10-Rpl36a
5.76e-05	-0.223666	0.16	0.261	1	mm10-AC127341.3
5.86e-05	0.146412	0.286	0.117	1	mm10-Prkch
5.93e-05	0.0737145	0.109	0.011	1	mm10-Fam45a
6e-05	0.265384	0.832	0.683	1	mm10-Pgam1
6.1e-05	-0.0403973	0	0.056	1	mm10-Gm26637
6.12e-05	0.102538	0.139	0.028	1	mm10-Hist1h1e
6.15e-05	-0.056658	0.008	0.083	1	mm10-Plxnd1
6.17e-05	0.030703	0.861	0.7	1	mm10-Rilpl2
6.22e-05	0.0627635	0.092	0.006	1	mm10-Sh2d5
6.26e-05	-0.135034	0.059	0.194	1	mm10-Tcf4
6.28e-05	-0.222446	0.735	0.817	1	mm10-Tap2
6.28e-05	-0.079909	0.017	0.111	1	mm10-Trim69
6.3e-05	0.34268	0.626	0.444	1	mm10-Mif
6.33e-05	0.0855668	0.147	0.028	1	mm10-Strn
6.39e-05	0.739354	0.672	0.5	1	mm10-Gm5483
6.48e-05	0.174796	0.983	0.922	1	mm10-Hcls1
6.49e-05	-0.220844	0.744	0.811	1	mm10-Mgat4a
6.52e-05	0.155979	0.504	0.294	1	mm10-Prelid1
6.56e-05	-0.0970208	0.029	0.122	1	mm10-Clcc1
6.61e-05	0.172567	0.525	0.317	1	mm10-Cyb5r4
6.7e-05	-0.18607	0.992	0.994	1	mm10-Msn
6.72e-05	-0.104538	0.008	0.094	1	mm10-Gm28707
6.75e-05	0.0994224	0.168	0.039	1	mm10-Usp37
6.92e-05	0.24218	0.958	0.906	1	mm10-Atp6v1e1
6.94e-05	-0.217552	0.542	0.683	1	mm10-Atf6
6.97e-05	0.148362	0.403	0.206	1	mm10-Tmed7
7.18e-05	-0.0756879	0.563	0.728	1	mm10-Cd74
7.21e-05	0.224545	0.899	0.789	1	mm10-Cux1
7.21e-05	0.273684	0.811	0.65	1	mm10-Igsf6
7.25e-05	-0.324259	0.613	0.739	1	mm10-Metrnl
7.27e-05	0.0597515	0.189	0.061	1	mm10-Ssr2
7.32e-05	-0.0967188	0.017	0.111	1	mm10-Pnp2
7.44e-05	-0.254339	0.895	0.95	1	mm10-Maff
7.49e-05	-0.154529	0.235	0.328	1	mm10-2900097C17Rik
7.52e-05	0.108711	0.273	0.106	1	mm10-Parvg
7.58e-05	-0.0976154	0.05	0.183	1	mm10-Tmem106a
7.59e-05	0.0985806	0.181	0.05	1	mm10-Exoc3
7.63e-05	0.154684	0.408	0.211	1	mm10-Trpc4ap
7.7e-05	0.196612	0.933	0.922	1	mm10-Gda
7.83e-05	0.114985	0.231	0.078	1	mm10-Rnf125
7.98e-05	-0.310464	0.084	0.222	1	mm10-Klf4
7.99e-05	0.113634	0.807	0.617	1	mm10-Eef2
8.04e-05	0.197919	0.987	0.956	1	mm10-Rpl17
8.07e-05	0.136643	0.408	0.211	1	mm10-Clec4a2
8.13e-05	0.143396	0.395	0.2	1	mm10-Rnf40
8.25e-05	-0.0841955	0.042	0.156	1	mm10-Phlpp2
8.34e-05	0.0609591	0.416	0.25	1	mm10-Sumo2
8.35e-05	0.132982	0.328	0.15	1	mm10-Ppig
8.35e-05	0.111106	0.261	0.1	1	mm10-Brap
8.38e-05	-0.218242	0.172	0.256	1	mm10-Wipi2
8.46e-05	0.18934	0.433	0.233	1	mm10-Plekha2
8.48e-05	0.36539	0.5	0.378	1	mm10-Gm12840
8.55e-05	0.138201	0.408	0.211	1	mm10-Esco1
8.66e-05	0.0490384	0.261	0.122	1	mm10-Stag1
8.68e-05	0.149874	0.538	0.328	1	mm10-Abracl
8.68e-05	0.185364	0.605	0.4	1	mm10-Napsa
8.76e-05	0.137699	0.332	0.15	1	mm10-Usp2
8.88e-05	-0.102111	0.076	0.217	1	mm10-Gm19412
8.93e-05	-0.251824	0.176	0.322	1	mm10-Ipmk
8.98e-05	-0.218565	0.592	0.628	1	mm10-Calr
8.99e-05	0.144262	0.374	0.183	1	mm10-Sbds
9e-05	0.172421	0.63	0.422	1	mm10-1600010M07Rik
9.01e-05	0.184113	0.685	0.478	1	mm10-Lrrc8d
9.07e-05	0.175503	0.349	0.167	1	mm10-Atrx
9.09e-05	-0.221847	0.513	0.65	1	mm10-Ghitm
9.2e-05	0.0872691	0.853	0.678	1	mm10-Sirpb1b
9.25e-05	-0.280416	0.95	0.967	1	mm10-Gna13
9.26e-05	-0.333978	0.437	0.606	1	mm10-Ly6c2
9.26e-05	0.0835459	0.164	0.039	1	mm10-Parg
9.31e-05	0.170106	0.601	0.389	1	mm10-N4bp2l2
9.31e-05	0.153923	0.374	0.189	1	mm10-Spin1
9.39e-05	-0.0591933	0.008	0.089	1	mm10-Ifi44
9.41e-05	0.086348	0.303	0.133	1	mm10-Fam160b2
9.42e-05	0.221346	0.941	0.844	1	mm10-Vps4b
9.44e-05	-0.0492117	0.021	0.1	1	mm10-Gas7
9.5e-05	-0.219908	0.874	0.911	1	mm10-Arrdc4
9.52e-05	0.136164	0.286	0.117	1	mm10-Ceacam1
9.53e-05	0.243951	0.714	0.556	1	mm10-Nop53
9.54e-05	0.155104	0.42	0.222	1	mm10-Krcc1
9.55e-05	0.120576	0.16	0.039	1	mm10-Mpzl3
9.55e-05	-0.0817894	0.017	0.106	1	mm10-Simc1
9.57e-05	0.121666	0.286	0.117	1	mm10-Tmem120a
9.65e-05	-0.247746	0.702	0.811	1	mm10-Arid4b
9.67e-05	-0.148308	0.223	0.344	1	mm10-Gm43796
9.71e-05	0.139556	0.286	0.117	1	mm10-Cklf
9.72e-05	-0.278553	0.891	0.928	1	mm10-Zfand5
9.72e-05	0.115343	0.181	0.056	1	mm10-Gabpb2
9.77e-05	0.152792	1	1	1	mm10-Clec4d
9.84e-05	0.173625	0.983	0.972	1	mm10-Arpc5
9.91e-05	-0.0724236	0.025	0.111	1	mm10-Col9a3
9.92e-05	-0.375408	0.937	0.889	1	mm10-Eif4a1
9.95e-05	0.181162	0.517	0.317	1	mm10-Ensa
9.99e-05	0.110997	0.235	0.083	1	mm10-Kif23
0.0001	-0.17114	0.966	0.933	1	mm10-Rbms1
0.000101	0.107518	0.193	0.056	1	mm10-Ccdc189
0.000101	0.166411	0.761	0.567	1	mm10-Tmbim4
0.000102	0.147876	0.214	0.072	1	mm10-9830107B12Rik
0.000102	0.0481572	0.181	0.067	1	mm10-Acox1
0.000102	0.146058	0.458	0.256	1	mm10-Khdrbs1
0.000102	0.0512663	0.059	0	1	mm10-Krt83
0.000102	0.033553	0.059	0	1	mm10-Gm13073
0.000102	0.195202	0.689	0.489	1	mm10-Rpl7a
0.000102	0.150366	0.391	0.2	1	mm10-Isyna1
0.000102	0.13584	0.399	0.206	1	mm10-Ptges3
0.000104	0.0635131	0.139	0.028	1	mm10-4833420G17Rik
0.000104	0.072611	0.336	0.172	1	mm10-Dcaf11
0.000105	0.165319	0.399	0.211	1	mm10-Kansl3
0.000106	-0.257865	0.542	0.661	1	mm10-H2-Q6
0.000106	0.196667	0.689	0.5	1	mm10-Abi1
0.000108	-0.119254	0.046	0.172	1	mm10-Phf11b
0.000108	0.230058	0.849	0.722	1	mm10-H2afj
0.00011	-0.21596	0.517	0.65	1	mm10-Trim34a
0.000111	0.122708	0.202	0.061	1	mm10-Hjurp
0.000111	0.165874	0.336	0.156	1	mm10-Igfbp6
0.000112	0.117576	0.244	0.089	1	mm10-Gltp
0.000113	0.102419	0.151	0.039	1	mm10-Bend4
0.000113	-0.0671973	0.013	0.1	1	mm10-Cfb
0.000114	-0.181798	0.462	0.55	1	mm10-Usp7
0.000114	0.138932	0.336	0.156	1	mm10-Crtc3
0.000116	0.123096	0.307	0.133	1	mm10-Psma6
0.000117	0.187876	0.588	0.389	1	mm10-Ifngr1
0.000119	0.157857	0.571	0.367	1	mm10-Aes
0.00012	0.106151	0.227	0.078	1	mm10-Cdk2ap1
0.00012	0.145389	0.395	0.206	1	mm10-Suds3
0.000122	-0.142375	0.168	0.317	1	mm10-Ngdn
0.000123	-0.174249	0.571	0.572	1	mm10-Qk
0.000125	-0.252631	0.307	0.461	1	mm10-Ly6i
0.000125	-0.160115	0.504	0.522	1	mm10-Kctd20
0.000126	-0.114025	0.042	0.161	1	mm10-Rasa4
0.000126	0.105939	0.525	0.328	1	mm10-Cbl
0.000127	-0.212522	0.857	0.911	1	mm10-Psme2
0.000128	0.222557	0.672	0.5	1	mm10-Tpst2
0.000128	0.112248	0.958	0.878	1	mm10-Chchd2
0.000128	-0.201522	0.307	0.472	1	mm10-Dcun1d1
0.000129	0.15168	0.454	0.256	1	mm10-Ndufa6
0.000129	0.157418	0.504	0.3	1	mm10-Mia3
0.00013	-0.0844184	0.042	0.15	1	mm10-Dennd1a
0.00013	0.189079	0.853	0.733	1	mm10-Cox6b1
0.000131	0.216597	0.643	0.467	1	mm10-Gm34084
0.000131	-0.214717	0.13	0.222	1	mm10-Slc4a7
0.000132	0.181528	0.475	0.278	1	mm10-Stat4
0.000132	0.0779115	0.168	0.044	1	mm10-Fam207a
0.000132	-0.346339	0.517	0.5	1	mm10-Mdm2
0.000136	-0.115362	0.084	0.217	1	mm10-Rbl1
0.000138	0.211679	0.853	0.717	1	mm10-Notch2
0.000139	0.238805	0.912	0.817	1	mm10-Tet2
0.000141	0.0624748	0.155	0.044	1	mm10-Oscp1
0.000143	0.125962	0.42	0.228	1	mm10-Cops9
0.000143	0.169346	0.588	0.406	1	mm10-Bin3
0.000143	0.135013	0.454	0.256	1	mm10-Smdt1
0.000146	0.155872	0.601	0.394	1	mm10-Chp1
0.000149	0.111329	0.311	0.139	1	mm10-P2ry2
0.000149	0.141934	0.185	0.061	1	mm10-B3gnt5
0.000151	0.206421	0.815	0.672	1	mm10-Il13ra1
0.000152	0.116106	0.437	0.244	1	mm10-Tomm22
0.000153	0.0662104	0.378	0.217	1	mm10-Hmces
0.000154	0.153207	0.761	0.567	1	mm10-Slc2a6
0.000154	0.0687121	0.197	0.067	1	mm10-Dynlt1f
0.000155	0.192006	0.101	0.011	1	mm10-Csf3
0.000157	0.144285	0.555	0.35	1	mm10-Lman2
0.00016	-0.194282	0.139	0.294	1	mm10-Il27
0.00016	0.0849186	0.197	0.061	1	mm10-Rbm18
0.000161	0.205001	0.782	0.617	1	mm10-Rab8a
0.000161	0.138225	0.555	0.35	1	mm10-Derl1
0.000162	-0.131863	0.597	0.567	1	mm10-Eif4a2
0.000163	0.123374	0.412	0.222	1	mm10-Nfe2
0.000165	0.112325	0.324	0.15	1	mm10-Rrp1
0.000166	0.172073	0.37	0.189	1	mm10-Spen
0.000167	-0.158759	0.513	0.567	1	mm10-Ppp1r12c
0.000167	-0.172008	0.181	0.217	1	mm10-Cbx4
0.000169	-0.0455488	0.668	0.55	1	mm10-Mef2d
0.000169	0.13378	0.378	0.194	1	mm10-Tomm6
0.000169	0.144999	0.433	0.239	1	mm10-Tmem127
0.00017	0.165768	0.429	0.239	1	mm10-Kdm5b
0.00017	0.0835206	0.16	0.039	1	mm10-Siva1
0.000172	0.0866729	0.214	0.072	1	mm10-Glrx2
0.000172	0.0843544	0.37	0.2	1	mm10-Aurkaip1
0.000172	0.385707	1	1	1	mm10-Cxcl2
0.000173	0.0588254	0.248	0.111	1	mm10-Marf1
0.000173	0.055764	0.101	0.011	1	mm10-Cfdp1
0.000174	0.0915611	0.168	0.044	1	mm10-Gsdme
0.000174	0.12431	0.248	0.094	1	mm10-Taf1
0.000176	0.145175	0.387	0.2	1	mm10-Zmynd11
0.000179	-0.166102	0.181	0.328	1	mm10-Svbp
0.000179	0.176261	0.899	0.883	1	mm10-Adipor1
0.000181	-0.0406516	0.349	0.3	1	mm10-Puf60
0.000182	0.184099	0.399	0.217	1	mm10-Tirap
0.000182	-0.0680557	0.004	0.072	1	mm10-Pbx4
0.000187	0.30486	0.437	0.272	1	mm10-Med21
0.000187	-0.338513	0.256	0.339	1	mm10-Slc26a11
0.000188	0.042881	0.055	0	1	mm10-Tor4a
0.000188	0.0408421	0.055	0	1	mm10-Cog1
0.000189	0.189751	0.975	0.939	1	mm10-Ptp4a1
0.000189	0.13213	0.345	0.167	1	mm10-Copb1
0.00019	-0.17136	0.197	0.294	1	mm10-Ikbke
0.000193	0.138632	0.475	0.278	1	mm10-Tmem164
0.000193	0.150441	0.571	0.372	1	mm10-Svil
0.000194	-0.213895	0.908	0.911	1	mm10-Mbnl2
0.000195	0.0948734	0.517	0.328	1	mm10-Npepps
0.000196	-0.160782	0.092	0.172	1	mm10-Srrt
0.000197	0.0985327	0.45	0.261	1	mm10-Srp9
0.000197	0.0600831	0.332	0.178	1	mm10-Polr2k
0.000199	-0.239996	0.42	0.494	1	mm10-Prpf38b
0.000201	0.0847843	0.113	0.017	1	mm10-Spn
0.000201	0.0583195	0.508	0.339	1	mm10-Dok3
0.000204	0.117459	0.748	0.556	1	mm10-Gm14286
0.000204	0.0491859	0.092	0.011	1	mm10-Trappc1
0.000205	0.182304	0.647	0.456	1	mm10-Pi16
0.000206	-0.0610389	0.248	0.189	1	mm10-Smad3
0.000207	-0.545262	0.756	0.783	1	mm10-Dusp2
0.000208	0.0926263	0.517	0.328	1	mm10-Eif4h
0.000208	-0.223786	0.718	0.806	1	mm10-Znrf1
0.000209	0.0572241	0.298	0.15	1	mm10-Dennd3
0.00021	-0.165356	0.718	0.767	1	mm10-Tbk1
0.00021	-0.226713	0.639	0.744	1	mm10-Inpp1
0.000212	0.0840166	0.176	0.05	1	mm10-Ndufaf7
0.000213	0.152381	0.387	0.206	1	mm10-Wdtc1
0.000216	0.136402	0.58	0.378	1	mm10-Ubxn1
0.000216	0.155339	0.349	0.172	1	mm10-Higd1a
0.000219	-0.128473	0.071	0.189	1	mm10-Zbtb5
0.000221	0.0726504	0.105	0.017	1	mm10-Lgals7
0.000221	0.11639	0.651	0.456	1	mm10-Syf2
0.000222	0.115416	0.387	0.206	1	mm10-Pip5k1c
0.000223	0.0510962	0.471	0.311	1	mm10-Rnf13
0.000224	0.200079	0.702	0.528	1	mm10-Tcn2
0.000224	0.0816116	0.399	0.228	1	mm10-Arhgap4
0.000228	0.164988	0.84	0.683	1	mm10-Tmem189
0.00023	0.107341	0.538	0.344	1	mm10-Rnf10
0.00023	-0.142674	0.185	0.289	1	mm10-Gm14010
0.00023	0.180898	0.597	0.4	1	mm10-Slc25a5
0.000231	-0.189327	0.357	0.494	1	mm10-Oas1g
0.000233	0.0839392	0.193	0.061	1	mm10-Vill
0.000235	-0.159049	0.21	0.367	1	mm10-Rpe
0.000236	0.183409	0.933	0.85	1	mm10-Lpcat2
0.000237	-0.0475983	0.004	0.072	1	mm10-Tssk6
0.000238	0.0774669	0.118	0.022	1	mm10-Tatdn1
0.000238	0.163899	0.332	0.161	1	mm10-Il16
0.000239	-0.117807	0.063	0.178	1	mm10-Man1a
0.000242	0.132506	0.429	0.239	1	mm10-Orai1
0.000243	0.115542	0.206	0.072	1	mm10-Ubtf
0.000244	0.124111	0.214	0.078	1	mm10-Atp5o.1
0.000247	-0.115913	0.155	0.25	1	mm10-Sertad3
0.000247	0.138005	0.319	0.15	1	mm10-Smim4
0.000248	0.160061	0.538	0.339	1	mm10-Aqp9
0.000249	-0.157525	0.176	0.339	1	mm10-March1
0.00025	0.170311	0.378	0.206	1	mm10-Trip11
0.000251	0.159838	0.819	0.667	1	mm10-Eef1b2
0.000253	-0.0631021	0.025	0.122	1	mm10-Sdc3
0.000254	-0.0853095	0.025	0.111	1	mm10-Icam4
0.000259	-0.136737	0.319	0.356	1	mm10-Cdc37
0.000261	0.0555834	0.155	0.05	1	mm10-Gm28192
0.000265	0.110704	0.244	0.094	1	mm10-Appbp2
0.000266	-0.195263	0.697	0.744	1	mm10-1110008F13Rik
0.000267	-0.217909	0.542	0.661	1	mm10-Prr5l
0.000268	0.0665997	0.143	0.033	1	mm10-Cdc123
0.000269	0.131129	0.34	0.167	1	mm10-Fam13b
0.00027	-0.260219	0.412	0.522	1	mm10-Mga
0.000272	0.179984	0.916	0.911	1	mm10-Skap2
0.000273	0.13263	0.588	0.389	1	mm10-BC005624
0.000273	0.107758	0.403	0.222	1	mm10-Sf3b5
0.000274	-0.0651797	0.008	0.083	1	mm10-Scpep1
0.000279	0.159438	0.975	0.95	1	mm10-Rps12
0.00028	-0.151702	0.702	0.717	1	mm10-Raly
0.00028	0.155444	0.508	0.317	1	mm10-Sec62
0.00028	0.152185	0.458	0.267	1	mm10-Gm17619
0.000281	-0.142545	0.87	0.967	1	mm10-Upp1
0.000283	-0.0270114	0.315	0.211	1	mm10-Gm26870
0.000283	-0.343339	0.164	0.3	1	mm10-Il23a
0.000285	-0.223629	0.92	0.906	1	mm10-Ier2
0.000286	-0.155967	0.273	0.339	1	mm10-Ccng2
0.000288	-0.0907151	0.517	0.472	1	mm10-Selenot
0.000288	0.162155	0.517	0.322	1	mm10-Fry
0.000288	0.00489688	0.059	0.017	1	mm10-Atmin
0.000288	0.0483878	0.105	0.017	1	mm10-2010013B24Rik
0.00029	-0.220755	0.861	0.944	1	mm10-Fas
0.000293	0.256581	0.916	0.906	1	mm10-Eif5a
0.000298	-0.0475581	0.416	0.344	1	mm10-Psmd8
0.000301	-0.19561	0.58	0.656	1	mm10-Usp38
0.000304	0.0632654	0.109	0.017	1	mm10-Kxd1
0.000309	0.120946	0.265	0.111	1	mm10-Svip
0.000309	0.257744	0.866	0.744	1	mm10-Clec5a
0.00031	-0.203482	0.429	0.572	1	mm10-Gm4070
0.000313	0.100465	0.445	0.261	1	mm10-Lin7c
0.000315	-0.107891	0.433	0.383	1	mm10-H2afy
0.000316	0.168028	0.592	0.4	1	mm10-Reep5
0.000317	0.143857	0.782	0.6	1	mm10-Sirpb1c
0.000318	0.0646406	0.122	0.022	1	mm10-Peli2
0.000318	0.226408	0.714	0.55	1	mm10-Pdlim5
0.000322	0.140839	0.718	0.528	1	mm10-Timm10b
0.000328	0.130638	0.256	0.106	1	mm10-Nin
0.000328	0.118508	0.345	0.172	1	mm10-Gtf2a2
0.000328	0.137458	0.546	0.35	1	mm10-Tubb6
0.000331	0.124862	0.412	0.233	1	mm10-Bnip3
0.000332	0.0936451	0.395	0.222	1	mm10-Wasf2
0.000335	0.204899	0.971	0.933	1	mm10-Smchd1
0.000336	-0.158291	0.235	0.322	1	mm10-Ppp2r3d
0.00034	-0.358095	0.139	0.261	1	mm10-Glul
0.000342	-0.156611	0.071	0.183	1	mm10-Gucy2c
0.000345	0.0784627	0.143	0.033	1	mm10-Eif3d
0.000345	0.0732152	0.189	0.067	1	mm10-Prkar2b
0.000348	0.0288689	0.05	0	1	mm10-Prss57
0.000348	0.0252719	0.05	0	1	mm10-Mfn1
0.000348	0.0357053	0.05	0	1	mm10-Zbtb25
0.000349	-0.161316	0.029	0.111	1	mm10-Slc12a9
0.00035	0.151736	0.307	0.144	1	mm10-Map3k2
0.000351	0.136917	0.504	0.311	1	mm10-Supt6
0.000351	0.138461	0.294	0.139	1	mm10-Prpf39
0.000351	0.0760382	0.374	0.211	1	mm10-Tbl1xr1
0.000352	0.0939625	0.429	0.25	1	mm10-Bcap31
0.000353	0.250991	0.895	0.806	1	mm10-Bhlhe40
0.000359	-0.130564	0.105	0.211	1	mm10-Pi4k2a
0.00036	-0.141294	0.252	0.4	1	mm10-Srsf6
0.000362	0.291857	1	1	1	mm10-Il1b
0.000368	-0.125534	0.95	0.994	1	mm10-Trim30d
0.000371	0.0863003	0.311	0.156	1	mm10-Smarca2
0.000371	0.198917	0.672	0.533	1	mm10-Adipor2
0.000373	-0.112507	0.055	0.144	1	mm10-Top3a
0.000374	-0.121487	0.387	0.422	1	mm10-Cnot4
0.000375	-0.0825884	0.008	0.083	1	mm10-Ints2
0.000376	0.105961	0.29	0.133	1	mm10-Sc5d
0.000378	0.156914	0.878	0.739	1	mm10-Hnrnpk
0.000378	-0.0331383	0	0.044	1	mm10-Neto2
0.000378	-0.0319406	0	0.044	1	mm10-Gm7334
0.000378	-0.0408006	0	0.044	1	mm10-Olfr432
0.000379	-0.19586	0.765	0.822	1	mm10-Nod1
0.000383	0.164742	0.454	0.267	1	mm10-Eif1a
0.000384	0.0480849	0.168	0.061	1	mm10-Zfp871
0.000384	-0.0305978	0.063	0.178	1	mm10-Nos2
0.000386	-0.0952131	0.05	0.117	1	mm10-Wdr43
0.000387	0.0578175	0.134	0.033	1	mm10-Stx8
0.000389	0.0850585	0.471	0.294	1	mm10-Csnk2b
0.00039	0.199039	0.773	0.617	1	mm10-Sidt2
0.000392	-0.1665	0.16	0.306	1	mm10-9130230L23Rik
0.000394	0.0780335	0.248	0.106	1	mm10-Vps13b
0.000397	0.0499747	0.092	0.011	1	mm10-Frmd8
0.000397	0.168182	0.996	0.994	1	mm10-Clec4e
0.000398	0.072628	0.256	0.117	1	mm10-Paxbp1
0.000399	0.180622	0.55	0.372	1	mm10-Ahi1
0.000399	0.108071	0.206	0.072	1	mm10-Rprd1b
0.000401	-0.199006	0.454	0.6	1	mm10-Sipa1l1
0.000403	0.134468	0.408	0.228	1	mm10-Snx4
0.000404	0.160777	0.525	0.333	1	mm10-Zmat2
0.000404	-0.222082	0.336	0.45	1	mm10-Xrn2
0.000406	-0.163412	0.172	0.333	1	mm10-Scimp
0.000408	-0.0897594	0.067	0.189	1	mm10-Mmp19
0.000409	0.173877	0.895	0.828	1	mm10-Pafah1b1
0.00041	-0.275525	0.567	0.689	1	mm10-Cdc42ep2
0.000411	0.0735289	0.105	0.017	1	mm10-Nop9
0.000413	0.0657999	0.13	0.028	1	mm10-Krr1
0.000417	0.142805	0.555	0.361	1	mm10-Tnfsf14
0.000419	0.0647627	0.248	0.117	1	mm10-Trappc10
0.000421	0.0997797	0.139	0.033	1	mm10-Eml1
0.000426	0.0736857	0.193	0.067	1	mm10-Atg5
0.000428	0.165532	0.618	0.428	1	mm10-Arf6
0.000429	-0.204909	0.887	0.906	1	mm10-Gla
0.000429	-0.246404	0.403	0.494	1	mm10-Osbpl8
0.000431	-0.242443	0.29	0.478	1	mm10-Inhba
0.000434	-0.280141	0.979	0.972	1	mm10-Socs3
0.000441	0.0735385	0.16	0.044	1	mm10-Jtb
0.000442	0.10945	0.584	0.394	1	mm10-Eif3k
0.000442	-0.143081	0.996	0.994	1	mm10-Sp140
0.000442	0.100295	0.269	0.117	1	mm10-Abcc1
0.000443	0.0514024	0.105	0.017	1	mm10-Chrm3
0.000444	0.120991	0.37	0.2	1	mm10-Cpne2
0.000447	0.0953423	0.357	0.194	1	mm10-Ncoa2
0.00045	0.135891	0.37	0.2	1	mm10-Hmgcl
0.000452	0.107049	0.252	0.106	1	mm10-Ndufb6
0.000453	0.0902295	0.256	0.111	1	mm10-Syncrip
0.000453	0.132263	0.395	0.217	1	mm10-Huwe1
0.000458	-0.205967	0.378	0.511	1	mm10-Stxbp5
0.000458	0.076196	0.164	0.05	1	mm10-Elovl5
0.000459	0.135736	0.168	0.056	1	mm10-Uck2
0.00046	-0.077692	0.013	0.078	1	mm10-Rps6kc1
0.000463	0.190695	0.815	0.689	1	mm10-Rpl23a
0.000463	0.162762	0.55	0.394	1	mm10-Sec11c
0.000464	-0.161708	0.319	0.417	1	mm10-Mctp2
0.000466	-0.117415	0.143	0.278	1	mm10-Syvn1
0.000466	0.0542126	0.126	0.028	1	mm10-Etfrf1
0.000467	0.12201	1	1	1	mm10-Plek
0.000471	-0.159901	0.996	0.994	1	mm10-Zcchc6
0.000472	0.0738095	0.168	0.05	1	mm10-Nme1
0.000472	0.215054	0.672	0.528	1	mm10-Flna
0.000472	0.232982	0.853	0.744	1	mm10-Fyb
0.000475	0.176804	0.55	0.4	1	mm10-Samd4b
0.000476	-0.00727866	0.151	0.072	1	mm10-Rab18
0.000479	0.126337	0.445	0.261	1	mm10-Taf6l
0.000481	0.126332	0.475	0.289	1	mm10-Eif4g3
0.000481	0.121426	0.374	0.2	1	mm10-Snrnp27
0.000483	-0.0797556	0.025	0.117	1	mm10-Zmym3
0.000483	0.064548	0.147	0.039	1	mm10-Nup155
0.000487	0.170681	0.521	0.333	1	mm10-Mier1
0.000488	-0.159198	0.294	0.439	1	mm10-Hist1h2be
0.000488	0.207901	0.714	0.583	1	mm10-Mapre1
0.000489	-0.167392	0.466	0.494	1	mm10-Gnaq
0.00049	0.105783	0.466	0.283	1	mm10-Sft2d1
0.000491	0.196472	0.672	0.539	1	mm10-Cfap43
0.000495	0.15196	0.282	0.133	1	mm10-E330009J07Rik
0.000495	-0.306265	0.954	0.961	1	mm10-Eif5
0.000496	-0.205017	0.601	0.672	1	mm10-Ncl
0.000497	-0.11575	0.176	0.3	1	mm10-Nup153
0.0005	-0.128106	0.332	0.439	1	mm10-Map3k3
0.000502	0.0646402	0.223	0.094	1	mm10-Zfp503
0.000502	0.107312	0.311	0.15	1	mm10-Sdhb
0.000504	-0.388104	0.941	0.956	1	mm10-Ifi27l2a
0.000506	0.0863905	0.248	0.106	1	mm10-Tpm3-rs7
0.000507	-0.264859	0.79	0.839	1	mm10-Gls
0.00051	0.0503198	0.126	0.028	1	mm10-Prr14l
0.000511	-0.16546	0.248	0.372	1	mm10-Sgms1
0.000512	0.105524	0.252	0.106	1	mm10-Palm
0.000514	0.147436	0.962	0.967	1	mm10-Ywhaz
0.000516	0.130577	0.378	0.206	1	mm10-Vps18
0.000518	-0.231137	0.882	0.911	1	mm10-Gk
0.000519	-0.0663229	0.013	0.089	1	mm10-Kmo
0.000519	-0.0819772	0.021	0.1	1	mm10-Slc7a8
0.00052	-0.111056	0.063	0.172	1	mm10-Txk
0.000524	-0.0707659	0.025	0.117	1	mm10-Evl
0.000527	0.073888	0.374	0.211	1	mm10-Ndfip1
0.000532	-0.175422	0.727	0.789	1	mm10-Psma3
0.000533	-0.116979	0.164	0.261	1	mm10-Fbxo4
0.000537	0.0583893	0.239	0.111	1	mm10-P2ry6
0.000539	0.0457508	0.16	0.061	1	mm10-Arrb1
0.000539	0.153101	0.399	0.222	1	mm10-Zc3h15
0.000542	0.189308	0.828	0.694	1	mm10-Rps15
0.000545	0.0522533	0.151	0.044	1	mm10-B230219D22Rik
0.000548	0.103469	0.252	0.111	1	mm10-Csnk1g2
0.000555	0.0666713	0.105	0.017	1	mm10-Nploc4
0.000561	0.0868251	0.176	0.056	1	mm10-Tmco1
0.000562	0.0428257	0.13	0.039	1	mm10-Cars
0.000563	0.185124	0.718	0.55	1	mm10-Myo1f
0.000563	-0.0470253	0.008	0.078	1	mm10-P2rx7
0.000563	0.191529	0.832	0.711	1	mm10-Hck
0.000564	0.203842	0.605	0.45	1	mm10-Rnf19a
0.000565	0.0390587	0.147	0.05	1	mm10-Rnf113a2
0.000568	0.108983	0.307	0.15	1	mm10-Madd
0.000569	0.0827668	0.176	0.056	1	mm10-Naa60
0.000571	0.0648847	0.181	0.061	1	mm10-Pebp1
0.000574	-0.203076	0.328	0.456	1	mm10-B4galt5
0.000583	-0.280435	0.655	0.783	1	mm10-Hk2
0.000587	0.189273	0.941	0.878	1	mm10-Syk
0.000588	0.12986	0.601	0.411	1	mm10-Nptn
0.000589	0.0770074	0.126	0.028	1	mm10-Stambpl1
0.000597	0.088081	0.639	0.456	1	mm10-Spop
0.000601	0.112637	0.445	0.267	1	mm10-Ppib
0.000605	0.0796264	0.155	0.044	1	mm10-Zbtb1
0.000609	0.0343212	0.353	0.222	1	mm10-Tacc1
0.000611	0.0780019	0.441	0.272	1	mm10-Cox5a
0.000616	0.089702	0.202	0.072	1	mm10-Hspa13
0.000617	0.0937019	0.294	0.139	1	mm10-Usp4
0.00062	0.113316	0.214	0.083	1	mm10-Pspc1
0.000628	0.206113	0.605	0.433	1	mm10-Phf20l1
0.000632	0.133706	0.391	0.217	1	mm10-Fam50a
0.000634	0.100453	0.483	0.306	1	mm10-Sh3kbp1
0.000638	0.061358	0.126	0.028	1	mm10-Lsm3
0.000639	-0.179437	0.466	0.617	1	mm10-Grn
0.000643	0.0723933	0.147	0.039	1	mm10-Trappc8
0.000644	0.0636452	0.126	0.028	1	mm10-Sec11a
0.000645	0.0310501	0.046	0	1	mm10-Sdccag8
0.000645	0.0280908	0.046	0	1	mm10-Noa1
0.000645	0.0277764	0.046	0	1	mm10-Psca
0.000645	0.0287817	0.046	0	1	mm10-Ccp110
0.000645	0.0247396	0.046	0	1	mm10-Urgcp
0.000645	0.0527615	0.151	0.05	1	mm10-Acadsb
0.000646	-0.105486	0.084	0.206	1	mm10-9530082P21Rik
0.000648	0.0814427	0.214	0.083	1	mm10-Ccdc88c
0.000662	0.0954628	0.37	0.206	1	mm10-Kdelr1
0.000662	0.143212	0.567	0.383	1	mm10-Ube2n
0.000663	-0.0897521	0.803	0.728	1	mm10-Cggbp1
0.000669	-0.0743834	0.063	0.117	1	mm10-9330160F10Rik
0.000672	0.0974029	0.315	0.156	1	mm10-Psmb2
0.000673	0.0853689	0.244	0.106	1	mm10-Dhrs1
0.000675	-0.175722	0.307	0.439	1	mm10-Ggt5
0.000676	0.0350897	0.109	0.028	1	mm10-Camkk2
0.000676	-0.18565	0.391	0.456	1	mm10-Tubb4b
0.000685	0.188737	0.933	0.856	1	mm10-Calm2
0.000685	0.0633788	0.189	0.067	1	mm10-Eef1d
0.000694	-0.0798802	0.008	0.078	1	mm10-Ufsp1
0.000694	-0.205171	0.702	0.789	1	mm10-Ugcg
0.000697	-0.148017	0.143	0.25	1	mm10-Kptn
0.000698	0.0114793	0.134	0.061	1	mm10-Aspscr1
0.000698	0.161158	0.58	0.394	1	mm10-Rack1
0.000701	0.0686392	0.113	0.022	1	mm10-Ago3
0.000702	0.0590111	0.492	0.333	1	mm10-Mpp7
0.000707	0.0801711	0.197	0.072	1	mm10-Arid3a
0.000709	0.0753759	0.429	0.267	1	mm10-Zfand6
0.00072	0.136243	0.912	0.794	1	mm10-Cox7a2
0.000728	-0.181327	0.887	0.911	1	mm10-Rnf114
0.000728	0.0874987	0.16	0.05	1	mm10-Ncoa6
0.000738	0.12797	0.214	0.083	1	mm10-Fam162a
0.000747	0.076945	0.357	0.206	1	mm10-Rab24
0.000747	0.180116	0.668	0.494	1	mm10-Nrd1
0.000755	-0.152756	0.588	0.622	1	mm10-Sdf4
0.000765	0.0922247	0.412	0.244	1	mm10-Psmd4
0.000768	0.0580713	0.206	0.089	1	mm10-Dnajc10
0.000772	0.190802	0.769	0.617	1	mm10-Gm14005
0.000772	0.0862746	0.239	0.1	1	mm10-Park7
0.000777	-0.203882	0.744	0.789	1	mm10-Arhgap30
0.000787	0.129401	0.441	0.267	1	mm10-Map2k2
0.00079	0.136859	0.517	0.333	1	mm10-Rab31
0.000794	0.119501	0.361	0.194	1	mm10-Pdia3
0.000796	0.0881265	0.164	0.05	1	mm10-Ppp1r13b
0.000801	0.0640134	0.181	0.067	1	mm10-Crybg3
0.000801	0.213277	0.836	0.694	1	mm10-Osgin1
0.000803	0.0485474	0.471	0.322	1	mm10-Traf3
0.000815	-0.275071	0.172	0.256	1	mm10-Plau
0.00082	0.0715715	0.227	0.1	1	mm10-Cnnm2
0.000822	-0.192172	0.643	0.672	1	mm10-Azin1
0.000825	0.100839	0.408	0.239	1	mm10-Mettl9
0.000839	0.0365587	0.164	0.067	1	mm10-Agtrap
0.00084	0.127235	0.374	0.206	1	mm10-Kmt5a
0.000841	0.102983	0.357	0.194	1	mm10-Selenof
0.000843	0.0936557	0.261	0.117	1	mm10-Taf12
0.000843	0.099182	0.269	0.122	1	mm10-Pram1
0.00085	-0.109611	0.097	0.194	1	mm10-Rab29
0.000856	0.0494019	0.374	0.233	1	mm10-March6
0.000858	-0.10413	0.097	0.211	1	mm10-1700041G16Rik
0.000861	0.0737742	0.122	0.028	1	mm10-Akap7
0.000865	0.0459699	0.164	0.061	1	mm10-Arsg
0.000873	0.0589273	0.101	0.017	1	mm10-Mmd
0.000874	0.0336889	0.286	0.167	1	mm10-Prpf8
0.00088	0.0481297	0.088	0.011	1	mm10-Zfp971
0.00088	-0.0843551	0.042	0.144	1	mm10-Fam129b
0.000881	0.722326	0.975	0.994	1	mm10-mt-Co2
0.000882	0.149639	1	0.972	1	mm10-Cxcr4
0.000883	0.882591	0.101	0.017	1	HSV--HSV1
0.000888	0.108118	0.37	0.206	1	mm10-Rasa3
0.000889	0.202202	0.626	0.456	1	mm10-Tinf2
0.000896	0.0760359	0.189	0.067	1	mm10-Stk16
0.000908	0.0494258	0.139	0.044	1	mm10-Utp4
0.00091	0.107197	0.235	0.1	1	mm10-Brd8
0.000912	0.122732	0.235	0.1	1	mm10-Gclm
0.000917	0.0703363	0.16	0.05	1	mm10-Cetn3
0.000936	-0.017048	0.004	0.039	1	mm10-Ch25h
0.000937	-0.0894255	0.218	0.217	1	mm10-Ahsa1
0.000941	-0.152381	0.521	0.65	1	mm10-Spp1
0.000943	-0.0304026	0	0.039	1	mm10-Nyx
0.000943	-0.0326016	0	0.039	1	mm10-Lrp12
0.000943	-0.033483	0	0.039	1	mm10-Slc7a2
0.000943	-0.0313021	0	0.039	1	mm10-Flt4
0.000943	-0.0240592	0	0.039	1	mm10-Focad
0.000943	-0.0204577	0	0.039	1	mm10-Sec24d
0.000943	0.0713572	0.315	0.172	1	mm10-Pttg1ip
0.000953	0.0732355	0.193	0.072	1	mm10-Ets1
0.000955	0.188421	0.903	0.789	1	mm10-Iqsec1
0.000956	0.111268	0.311	0.156	1	mm10-Acbd3
0.000961	0.232253	0.945	0.894	1	mm10-Dgat1
0.000965	-0.058956	0.429	0.361	1	mm10-Ppp1cc
0.000981	0.0267222	0.084	0.017	1	mm10-Lsm5
0.000981	-0.112696	0.126	0.261	1	mm10-Rere
0.000988	-0.106999	0.055	0.156	1	mm10-Zfp296
0.000988	0.115901	0.483	0.306	1	mm10-Scp2
0.000991	0.12979	0.366	0.206	1	mm10-Ric1
0.00100369	-0.173126	0.214	0.356	1	mm10-Sec24a
0.00101032	0.0142733	0.269	0.172	1	mm10-Dap
0.00101076	0.0958015	0.374	0.211	1	mm10-Hcfc1r1
0.00101233	-0.172407	0.206	0.294	1	mm10-Fbxo30
0.00101279	0.135582	0.277	0.133	1	mm10-Nfkbil1
0.00101436	0.0272585	0.193	0.1	1	mm10-Mrpl4
0.00101582	0.078393	0.21	0.083	1	mm10-Exoc1
0.00101776	0.0344775	0.071	0.006	1	mm10-Ipo4
0.00102933	-0.087364	0.055	0.15	1	mm10-Gpr18
0.00103197	-0.132079	0.164	0.311	1	mm10-Sav1
0.00103328	0.136537	0.857	0.728	1	mm10-Rab2a
0.00104062	0.180958	0.895	0.789	1	mm10-Ptpn6
0.00104256	0.165547	0.79	0.661	1	mm10-Tma7
0.00104401	0.0564447	0.239	0.111	1	mm10-Trub2
0.00104625	0.0863373	0.349	0.194	1	mm10-Nucb1
0.00104857	0.0206744	0.059	0.006	1	mm10-Dcaf17
0.00105579	-0.00644825	0.071	0.033	1	mm10-Zbtb37
0.00106408	0.0804781	0.458	0.283	1	mm10-Klhdc4
0.00106477	0.0550381	0.109	0.022	1	mm10-Cyp51
0.00106701	0.0973046	0.202	0.078	1	mm10-Uqcrb
0.00106978	0.107251	0.324	0.167	1	mm10-Ndufb3
0.00107035	0.074539	0.256	0.117	1	mm10-Gsto1
0.00107756	0.0395026	0.252	0.139	1	mm10-Ubash3b
0.00107776	0.0722872	0.122	0.028	1	mm10-Cd81
0.00108376	-0.0926512	0.029	0.106	1	mm10-Dapk1
0.00108644	0.0364796	0.071	0.006	1	mm10-Gm10851
0.00109213	0.0668674	0.147	0.044	1	mm10-Zfand2b
0.00109326	0.159829	0.534	0.356	1	mm10-Kdm3a
0.00109514	0.180402	0.361	0.211	1	mm10-Mxi1
0.00109894	0.132937	0.908	0.794	1	mm10-Pxn
0.00109928	0.0802167	0.324	0.172	1	mm10-Unc119
0.00110037	0.03937	0.071	0.006	1	mm10-Qpctl
0.00110946	0.116971	0.471	0.294	1	mm10-Tprgl
0.00111258	0.105861	0.265	0.122	1	mm10-Mdk
0.00111575	-0.0436209	0.004	0.061	1	mm10-Tefm
0.00111881	-0.0546745	0.063	0.1	1	mm10-Ythdf2
0.00112365	0.194719	0.697	0.561	1	mm10-Rpl22
0.00112786	0.126301	0.294	0.144	1	mm10-Sqor
0.00113146	0.126158	0.651	0.472	1	mm10-Leprotl1
0.00113579	0.152552	0.55	0.372	1	mm10-Saraf
0.00113789	0.0809635	0.218	0.089	1	mm10-Scaper
0.001145	0.0528843	0.45	0.3	1	mm10-Usf2
0.00114554	0.230451	0.773	0.611	1	mm10-Mrgpra2a
0.0011487	0.081492	0.168	0.056	1	mm10-Cep170
0.00115067	-0.188473	0.387	0.483	1	mm10-Dck
0.00115111	-0.183093	0.424	0.533	1	mm10-Atp6v1c1
0.00115597	0.287697	0.239	0.111	1	mm10-Nr4a2
0.00115801	0.0730208	0.164	0.056	1	mm10-Cdip1
0.0011654	-0.237399	0.239	0.306	1	mm10-Larp1b
0.00117931	0.0780206	0.361	0.211	1	mm10-Ubxn2a
0.00118529	0.171252	0.845	0.717	1	mm10-Rbm25
0.0011883	0.0829751	0.223	0.094	1	mm10-Atg16l2
0.00119365	0.0169698	0.042	0	1	mm10-Ube2v2
0.00119365	0.0312605	0.042	0	1	mm10-Mrpl45
0.00119365	0.0207992	0.042	0	1	mm10-Fam177a
0.00119857	-0.156703	0.466	0.533	1	mm10-Gosr2
0.0011998	-0.164131	0.773	0.778	1	mm10-Napa
0.00120114	0.0904834	0.118	0.028	1	mm10-Rnpc3
0.0012051	-0.0874122	0.017	0.083	1	mm10-Trip6
0.00121513	-0.0940482	0.05	0.15	1	mm10-Plekhb2
0.00121727	0.119423	0.252	0.117	1	mm10-Ubald1
0.00122064	0.0243428	0.16	0.072	1	mm10-Lats2
0.00122409	0.0747407	0.471	0.3	1	mm10-Tomm20
[truncated: 11,247 more rows]

## Sheet: S1 d5 HSV1 vs d5 HSV2 cluster 2
p_val	avg_logFC	pct.1	pct.2	p_val_adj	gene
1.05933e-101	-1.11362	0.898	1	3.28976e-97	mm10-Irf7
9.3193e-90	-1.11736	0.853	0.997	2.89411e-85	mm10-Gbp2
8.83912e-88	-1.15543	0.686	0.984	2.74499e-83	mm10-Ifit3
3.12914e-82	-0.989236	0.882	1	9.71754e-78	mm10-Irgm1
8.23757e-82	-1.10944	0.613	0.974	2.55818e-77	mm10-Ctss
1.69493e-81	-1.10749	0.864	1	5.26361e-77	mm10-Ifit1
4.68816e-80	-0.723177	0.997	1	1.45591e-75	mm10-B2m
3.37886e-65	-1.17218	0.49	0.927	1.04931e-60	mm10-Ifi207
1.64782e-64	-1.41284	0.364	0.861	5.1173e-60	mm10-Ifit2
2.41938e-63	-0.765204	0.859	0.995	7.51337e-59	mm10-Ifi47
3.62732e-63	-0.899926	0.668	0.99	1.12646e-58	mm10-Ifit3b
4.41406e-62	-0.87162	0.775	0.99	1.37079e-57	mm10-Fcgr4
2.95299e-61	-0.902131	0.961	1	9.1705e-57	mm10-Rsad2
2.726e-60	0.951611	0.958	0.714	8.4656e-56	mm10-Spag9
6.26201e-60	-1.31686	0.641	0.971	1.94467e-55	mm10-Cxcl10
1.5996e-59	-0.888893	0.895	0.992	4.96755e-55	mm10-Slfn5
2.2066e-57	-1.10145	0.382	0.864	6.85258e-53	mm10-Nt5c3
3.79899e-57	-1.59436	0.107	0.638	1.17978e-52	mm10-Ifi203
2.68709e-56	-1.53634	0.675	0.932	8.34475e-52	mm10-Ccl4
7.78183e-56	-0.856844	0.652	0.979	2.41665e-51	mm10-Gbp5
1.41892e-55	-1.14125	0.306	0.829	4.40645e-51	mm10-Ifi211
1.56967e-54	-0.759651	0.887	0.984	4.87462e-50	mm10-Isg20
1.13498e-52	-1.50563	0.105	0.609	3.52469e-48	mm10-Mndal
6.15689e-52	-1.48025	0.5	0.882	1.91202e-47	mm10-Wfdc17
1.14352e-51	-1.14976	0.178	0.706	3.5512e-47	mm10-Ifi209
1.16671e-50	-0.6984	0.874	0.995	3.62323e-46	mm10-Tapbp
2.09574e-49	-1.08688	0.364	0.806	6.50832e-45	mm10-Gbp3
1.56718e-48	-0.994976	0.542	0.924	4.86687e-44	mm10-Pnp
2.165e-48	-1.28719	0.393	0.816	6.7234e-44	mm10-Socs1
4.52552e-48	-1.20174	0.359	0.827	1.4054e-43	mm10-Tagap
9.6371e-48	0.741403	1	0.995	2.9928e-43	mm10-Actb
4.2685e-47	-0.839033	0.709	0.929	1.32558e-42	mm10-Plekho2
3.12082e-46	-0.593131	0.898	0.997	9.6917e-42	mm10-Ifi204
2.97701e-45	-0.509265	0.992	1	9.24509e-41	mm10-H2-D1
5.59872e-45	-0.59112	0.987	1	1.73868e-40	mm10-H2-K1
7.86244e-45	0.404822	1	1	2.44168e-40	mm10-Malat1
6.36478e-44	-0.915445	0.573	0.911	1.97658e-39	mm10-Peli1
2.66895e-43	-1.06913	0.463	0.858	8.28844e-39	mm10-Plac8
6.70773e-43	-0.771576	0.83	0.979	2.08309e-38	mm10-Irf1
8.99637e-43	0.792255	0.969	0.832	2.79382e-38	mm10-Samsn1
1.38026e-42	-0.778843	0.749	0.932	4.28641e-38	mm10-Ly6e
1.49581e-42	-0.796014	0.856	0.984	4.64523e-38	mm10-Cd274
2.46292e-42	-0.809424	0.565	0.906	7.64861e-38	mm10-Daxx
2.5655e-41	-0.770499	0.929	0.974	7.96717e-37	mm10-Fgl2
4.26201e-40	1.94566	0.623	0.247	1.32357e-35	mm10-Thbs1
7.18054e-40	-0.981324	0.165	0.619	2.22992e-35	mm10-Lipg
1.55696e-39	-0.636124	0.914	0.992	4.83513e-35	mm10-Nampt
1.88489e-39	-0.83778	0.455	0.835	5.85352e-35	mm10-Znfx1
5.44139e-39	-0.889489	0.618	0.919	1.68982e-34	mm10-Cmpk2
1.1236e-38	-0.620099	0.835	0.995	3.48935e-34	mm10-Oasl1
4.99377e-38	0.786895	0.88	0.709	1.55082e-33	mm10-Lilrb4a
1.06699e-37	0.853066	0.738	0.357	3.31353e-33	mm10-Snx18
7.63955e-37	-0.852019	0.099	0.509	2.37246e-32	mm10-Pml
1.16296e-36	-0.818592	0.377	0.785	3.61158e-32	mm10-Apobec3
2.13575e-36	0.587009	0.325	0.01	6.63257e-32	mm10-Hbb-bs
1.74513e-35	-0.707448	0.531	0.892	5.4195e-31	mm10-Usp18
4.75028e-35	-1.38971	0.123	0.517	1.4752e-30	mm10-Cd69
6.10694e-35	0.638935	1	0.982	1.89651e-30	mm10-Cebpb
1.80037e-34	-0.49877	0.971	1	5.59105e-30	mm10-Ifitm3
6.59848e-34	-0.881283	0.175	0.591	2.04916e-29	mm10-Trim30c
1.41746e-33	-0.558792	0.898	0.99	4.40193e-29	mm10-Clec2d
1.52269e-33	0.90845	0.971	0.898	4.72872e-29	mm10-Cd14
2.14295e-32	-0.879388	0.105	0.488	6.65494e-28	mm10-Ifi208
1.8636e-31	-0.967415	0.241	0.625	5.78742e-27	mm10-Bbx
2.11936e-31	-0.833285	0.115	0.496	6.58169e-27	mm10-Fcgr1
5.36081e-31	1.12564	0.901	0.609	1.6648e-26	mm10-G0s2
8.77298e-31	-0.505692	0.885	0.982	2.72445e-26	mm10-Trafd1
1.47268e-30	-0.816173	0.086	0.449	4.57341e-26	mm10-Ifi205
2.25454e-30	0.447078	1	0.997	7.00146e-26	mm10-Mcl1
1.77189e-29	-0.400605	0.966	0.997	5.5026e-25	mm10-Tmbim6
2.01046e-29	-0.600454	0.812	0.95	6.24347e-25	mm10-Zbp1
6.54453e-29	-0.587267	0.72	0.942	2.0324e-24	mm10-9930111J21Rik2
1.89044e-28	-0.919391	0.207	0.577	5.87077e-24	mm10-Gyg
2.15916e-28	0.979257	0.728	0.551	6.70528e-24	mm10-Tiparp
3.8516e-28	-0.688308	0.699	0.892	1.19611e-23	mm10-Rnf19b
5.26444e-28	0.66084	0.89	0.672	1.63487e-23	mm10-Ndel1
4.13485e-27	0.582872	0.976	0.916	1.28408e-22	mm10-Lcp1
5.55533e-27	-0.434675	0.958	1	1.72521e-22	mm10-Parp14
1.29967e-26	-0.711734	0.466	0.761	4.03613e-22	mm10-Cd164
1.56213e-26	0.631346	0.971	0.874	4.85121e-22	mm10-Slc7a11
3.15351e-26	0.782302	0.539	0.207	9.79321e-22	mm10-Ptgs2os2
3.61792e-26	-0.741945	0.73	0.898	1.12355e-21	mm10-Ctsz
4.87941e-26	-0.581335	0.851	0.974	1.5153e-21	mm10-Rnf213
1.46583e-25	0.659493	0.712	0.409	4.55214e-21	mm10-Kras
2.13566e-25	-0.430606	0.838	0.987	6.6323e-21	mm10-Herc6
3.0299e-25	0.584586	0.961	0.961	9.40936e-21	mm10-Ifitm2
3.93855e-25	0.634639	0.759	0.433	1.22312e-20	mm10-Fmnl1
4.40326e-25	-0.801107	0.267	0.612	1.36743e-20	mm10-Gbp9
4.83504e-25	0.733107	0.806	0.522	1.50152e-20	mm10-Lyst
5.48168e-25	0.660106	0.893	0.669	1.70234e-20	mm10-Fosl2
5.92928e-25	-0.779032	0.369	0.698	1.84134e-20	mm10-Ralgds
6.71577e-25	-0.55046	0.56	0.877	2.08558e-20	mm10-Clic4
7.1483e-25	-0.77126	0.165	0.483	2.2199e-20	mm10-P2ry13
7.68803e-25	-0.870016	0.157	0.504	2.38752e-20	mm10-Cybb
7.8473e-25	-0.657826	0.445	0.748	2.43698e-20	mm10-H2-T22
2.01803e-24	0.63114	0.775	0.549	6.267e-20	mm10-Lrrfip1
2.38951e-24	0.645216	0.762	0.517	7.42061e-20	mm10-Emilin2
3.88135e-24	0.438299	0.992	0.992	1.20535e-19	mm10-Cd44
7.55408e-24	-0.834721	0.029	0.281	2.34592e-19	mm10-Gbp4
8.77319e-24	-0.60063	0.445	0.751	2.72451e-19	mm10-1600014C10Rik
9.83655e-24	0.604852	0.814	0.612	3.05474e-19	mm10-Mrpl33
1.20341e-23	-0.789632	0.359	0.659	3.73718e-19	mm10-Tarm1
2.66702e-23	0.668755	0.866	0.648	8.28243e-19	mm10-Dennd4a
3.1468e-23	-0.578645	0.579	0.84	9.77239e-19	mm10-Tspo
3.84191e-23	0.62355	0.869	0.696	1.19311e-18	mm10-Neurl3
4.28438e-23	-0.631696	0.039	0.291	1.33051e-18	mm10-Mgat1
6.32258e-23	0.443761	0.984	0.871	1.96348e-18	mm10-Skil
9.8905e-23	-0.578786	0.17	0.496	3.0715e-18	mm10-Sft2d2
1.31257e-22	-0.658106	0.406	0.722	4.07619e-18	mm10-Npc2
1.46418e-22	0.661641	0.584	0.299	4.54701e-18	mm10-Coq10b
1.8859e-22	-0.61026	0.442	0.764	5.85666e-18	mm10-Etnk1
1.92825e-22	0.436909	0.997	0.969	5.98818e-18	mm10-Cd9
2.93321e-22	0.395437	0.992	0.982	9.10909e-18	mm10-Fxyd5
3.38334e-22	0.554203	0.995	0.987	1.0507e-17	mm10-Actg1
4.40763e-22	-0.307045	0.99	1	1.36879e-17	mm10-Slfn4
6.23245e-22	1.86254	0.304	0.047	1.93549e-17	mm10-Cxcl3
2.16277e-21	-0.421989	0.958	0.992	6.71649e-17	mm10-Ier5
3.53884e-21	-0.432843	0.704	0.927	1.09899e-16	mm10-Sppl2a
3.67602e-21	-0.510085	0.78	0.937	1.14159e-16	mm10-Tor1aip1
4.20025e-21	-0.537941	0.662	0.879	1.30439e-16	mm10-Psmb8
4.78219e-21	-0.652438	0.073	0.336	1.48511e-16	mm10-Mgam
5.08634e-21	0.429492	0.89	0.874	1.57956e-16	mm10-Cfl1
5.22394e-21	-0.524522	0.801	0.937	1.6223e-16	mm10-Gbp7
8.41216e-21	-0.572084	0.963	0.982	2.6124e-16	mm10-Ubc
1.20411e-20	0.565739	0.788	0.53	3.73936e-16	mm10-Myh9
1.33026e-20	-0.47836	0.526	0.824	4.13112e-16	mm10-Tor3a
1.57451e-20	-0.601107	0.102	0.386	4.88964e-16	mm10-Fcgr2b
1.72633e-20	-0.372129	0.969	0.995	5.36112e-16	mm10-Samhd1
2.28281e-20	0.640649	0.754	0.564	7.08928e-16	mm10-Dusp16
2.61466e-20	-0.573749	0.173	0.48	8.11982e-16	mm10-Usb1
2.67634e-20	-0.570071	0.736	0.919	8.31139e-16	mm10-Atf3
3.67022e-20	-0.345532	0.942	0.997	1.13979e-15	mm10-Trim30a
4.33745e-20	0.525215	0.874	0.706	1.347e-15	mm10-Sf3b1
4.64514e-20	0.589447	0.712	0.446	1.44255e-15	mm10-Gpr35
4.78236e-20	-0.507946	0.961	0.995	1.48516e-15	mm10-Hcar2
5.61877e-20	0.629548	0.686	0.433	1.74491e-15	mm10-Mcemp1
5.83015e-20	-0.645772	0.223	0.533	1.81055e-15	mm10-Ube2l6
6.10168e-20	-0.520579	0.249	0.572	1.89488e-15	mm10-Tmem184b
9.68633e-20	-0.486856	0.482	0.777	3.00809e-15	mm10-Casp8
1.33231e-19	0.626661	0.581	0.27	4.13748e-15	mm10-Cd80
1.5437e-19	-0.752857	0.377	0.688	4.79397e-15	mm10-C3
2.01402e-19	0.612822	0.628	0.323	6.25455e-15	mm10-Gpat3
2.1946e-19	-0.723161	0.071	0.323	6.81534e-15	mm10-Ppa1
2.20303e-19	0.545744	0.89	0.787	6.84151e-15	mm10-Nfe2l2
2.43971e-19	-0.371584	0.935	0.984	7.57651e-15	mm10-Rtp4
3.07871e-19	-0.494406	0.152	0.451	9.56094e-15	mm10-Psma5
3.36065e-19	-0.417986	0.846	0.969	1.04365e-14	mm10-Oas3
4.16963e-19	-0.499723	0.309	0.633	1.29488e-14	mm10-Psme2b
4.46346e-19	-0.475359	0.717	0.932	1.38613e-14	mm10-Ifih1
5.09862e-19	-0.808598	0.058	0.299	1.58338e-14	mm10-Ifit1bl1
5.15569e-19	0.633296	0.932	0.806	1.6011e-14	mm10-Btg2
5.93379e-19	-0.509561	0.45	0.748	1.84274e-14	mm10-Arl6ip1
7.2054e-19	-0.62097	0.411	0.698	2.23764e-14	mm10-Fndc3a
7.48011e-19	0.470471	0.974	0.858	2.32295e-14	mm10-Dusp1
9.12954e-19	-0.496713	0.644	0.858	2.83518e-14	mm10-Xaf1
1.01856e-18	0.579711	0.599	0.289	3.16315e-14	mm10-Cpeb2
1.04854e-18	-0.414545	0.764	0.94	3.25623e-14	mm10-Ddx58
1.08404e-18	-0.287535	0.008	0.176	3.36649e-14	mm10-Ms4a4c
1.11371e-18	0.628416	0.783	0.522	3.45862e-14	mm10-Slc16a3
1.30949e-18	-0.728865	0.065	0.312	4.06662e-14	mm10-Fam26f
1.33545e-18	-0.410693	0.859	0.955	4.14724e-14	mm10-H2-T23
1.36538e-18	0.640418	0.822	0.606	4.2402e-14	mm10-Nfkbiz
2.40305e-18	0.596715	0.686	0.436	7.46267e-14	mm10-Tpm4
2.41169e-18	0.557161	0.751	0.496	7.4895e-14	mm10-Gcnt2
2.94842e-18	-0.398812	0.885	0.979	9.15632e-14	mm10-Csrnp1
3.16135e-18	-0.450419	0.589	0.837	9.81757e-14	mm10-Ogfr
3.71667e-18	-0.454683	0.471	0.769	1.15421e-13	mm10-Nmi
3.77609e-18	-0.448498	0.66	0.885	1.17267e-13	mm10-Dtx3l
4.87837e-18	-0.589139	0.419	0.688	1.51498e-13	mm10-Ripk1
5.00464e-18	-0.311431	0.995	1	1.55419e-13	mm10-Isg15
1.33214e-17	0.742069	0.984	0.934	4.13695e-13	mm10-Cxcl2
1.4881e-17	-0.468091	0.021	0.21	4.62128e-13	mm10-P2ry14
1.73483e-17	0.576685	0.636	0.428	5.38751e-13	mm10-Chst11
1.94218e-17	0.524466	0.953	0.808	6.03145e-13	mm10-Marcksl1
2.0448e-17	0.979203	0.67	0.486	6.35013e-13	mm10-Ptgs2
2.39585e-17	0.420329	0.901	0.798	7.44031e-13	mm10-Arpc1b
2.46561e-17	-0.37062	0.788	0.942	7.65695e-13	mm10-Zc3hav1
2.48109e-17	-0.607887	0.51	0.753	7.70503e-13	mm10-Atp6v1a
2.67812e-17	-0.680858	0.521	0.798	8.31691e-13	mm10-Ccl3
2.8445e-17	0.546624	0.505	0.283	8.8336e-13	mm10-Sra1
3.43766e-17	-0.427326	0.709	0.906	1.06757e-12	mm10-Ddx60
3.87648e-17	-0.521148	0.809	0.934	1.20384e-12	mm10-Sat1
4.27358e-17	-0.390441	0.809	0.942	1.32716e-12	mm10-Slfn8
5.20132e-17	-0.509686	0.102	0.333	1.61527e-12	mm10-Pnpla2
5.90532e-17	-0.618508	0.136	0.407	1.8339e-12	mm10-Ly6a
7.68069e-17	-0.425058	0.809	0.937	2.38524e-12	mm10-Tnfrsf1a
8.10707e-17	1.1751	0.5	0.328	2.51765e-12	mm10-Fos
1.31285e-16	0.625788	0.605	0.365	4.07705e-12	mm10-Nedd9
1.32005e-16	0.402211	0.948	0.822	4.09941e-12	mm10-Vasp
1.32328e-16	-0.254579	0.005	0.157	4.10945e-12	mm10-Ccl7
1.52672e-16	0.353183	1	0.997	4.74123e-12	mm10-Btg1
1.91866e-16	0.512746	0.851	0.73	5.95841e-12	mm10-Gapdh
2.32545e-16	-0.614181	0.183	0.446	7.22167e-12	mm10-Ppp1r15b
2.33728e-16	-0.48325	0.128	0.383	7.25841e-12	mm10-Rnpep
3.32058e-16	-0.506914	0.346	0.614	1.03121e-11	mm10-Il18bp
4.45735e-16	0.627151	0.647	0.423	1.38423e-11	mm10-Ppp1r3b
4.59611e-16	-0.460482	0.435	0.724	1.42732e-11	mm10-Tmem140
4.76524e-16	-0.459116	0.547	0.785	1.47985e-11	mm10-Oas2
4.91111e-16	0.518985	0.696	0.42	1.52515e-11	mm10-Selenon
6.18145e-16	0.322973	0.997	0.992	1.91965e-11	mm10-Fau
6.26143e-16	-0.677811	0.194	0.451	1.94449e-11	mm10-D1Ertd622e
6.7946e-16	0.474944	0.958	0.932	2.11006e-11	mm10-Tgm2
1.00892e-15	-0.425584	0.11	0.36	3.1332e-11	mm10-Mov10
1.28305e-15	-0.452612	0.288	0.572	3.98452e-11	mm10-Dhx58
1.28576e-15	-0.466677	0.589	0.811	3.99292e-11	mm10-Zufsp
1.55042e-15	0.486055	0.636	0.365	4.81484e-11	mm10-Chd2
1.77196e-15	0.635749	0.966	0.927	5.50281e-11	mm10-AY036118
1.84484e-15	0.513131	0.613	0.341	5.72916e-11	mm10-Tnrc18
1.91001e-15	-0.704316	0.207	0.467	5.93152e-11	mm10-Cpeb4
1.94808e-15	-0.429371	0.283	0.575	6.04976e-11	mm10-Olfr56
2.00077e-15	-0.502927	0.149	0.412	6.21338e-11	mm10-Mb21d1
2.06195e-15	0.545149	0.801	0.693	6.4034e-11	mm10-Smchd1
2.0902e-15	-0.482373	0.411	0.685	6.49111e-11	mm10-1810037I17Rik
2.59242e-15	-0.746974	0.346	0.57	8.05075e-11	mm10-Rnasel
2.7687e-15	0.51173	0.555	0.323	8.5982e-11	mm10-Rlf
2.98104e-15	-0.452777	0.508	0.774	9.25763e-11	mm10-Stat2
3.41226e-15	-0.480762	0.28	0.562	1.05968e-10	mm10-Casp1
3.44724e-15	0.52698	0.717	0.501	1.07054e-10	mm10-AC110211.1
4.06405e-15	0.466815	0.709	0.556	1.26209e-10	mm10-Cotl1
4.37216e-15	0.724977	0.298	0.087	1.35778e-10	mm10-Rdh12
4.37362e-15	-0.469228	0.613	0.808	1.35823e-10	mm10-Shisa5
5.65238e-15	-0.409411	0.644	0.874	1.75535e-10	mm10-Igtp
5.94606e-15	0.687192	0.594	0.357	1.84655e-10	mm10-Dmxl2
6.29621e-15	-0.56509	0.199	0.436	1.95529e-10	mm10-Il15ra
6.35271e-15	-0.75563	0.16	0.417	1.97283e-10	mm10-Ly6c2
7.47258e-15	0.336804	0.997	0.987	2.32061e-10	mm10-Hdc
8.37137e-15	-0.481194	0.581	0.798	2.59973e-10	mm10-Lgals9
8.66569e-15	-0.385761	0.691	0.885	2.69113e-10	mm10-Parp10
1.13222e-14	-0.374111	0.974	0.934	3.51611e-10	mm10-Lars2
1.18868e-14	-0.457214	0.398	0.675	3.69145e-10	mm10-Pttg1
1.196e-14	0.462086	0.626	0.391	3.71417e-10	mm10-Cmip
1.57864e-14	0.557915	0.83	0.693	4.90245e-10	mm10-Chd7
1.61152e-14	0.451913	0.772	0.585	5.00458e-10	mm10-Capzb
1.90301e-14	1.04789	0.45	0.244	5.9098e-10	mm10-Vegfa
1.94077e-14	-0.308365	0.987	0.995	6.02707e-10	mm10-Cd53
1.94706e-14	0.591847	0.581	0.336	6.04661e-10	mm10-Spata13
2.18453e-14	-0.397737	0.031	0.207	6.78407e-10	mm10-Hibadh
2.2439e-14	-0.493096	0.188	0.444	6.96843e-10	mm10-Xdh
2.27855e-14	0.278178	0.963	0.982	7.07602e-10	mm10-Rps27
2.31584e-14	-0.474355	0.102	0.333	7.19183e-10	mm10-Tifa
2.59802e-14	-0.501629	0.233	0.496	8.06816e-10	mm10-Fabp5
2.88383e-14	-0.507791	0.115	0.341	8.95574e-10	mm10-Fam241a
3.36088e-14	0.431903	0.796	0.667	1.04372e-09	mm10-Son
3.49411e-14	-0.800815	0.526	0.722	1.0851e-09	mm10-AA467197
5.21384e-14	-0.433523	0.196	0.459	1.61916e-09	mm10-Plk2
5.5062e-14	0.383507	0.322	0.097	1.70995e-09	mm10-Cdk17
5.64615e-14	0.617456	0.702	0.493	1.75341e-09	mm10-Nr4a3
6.63287e-14	-0.445407	0.047	0.231	2.05984e-09	mm10-Dr1
6.82936e-14	-0.45717	0.545	0.764	2.12086e-09	mm10-Eif2ak2
7.14859e-14	-0.528083	0.306	0.57	2.21999e-09	mm10-Mpp1
7.38717e-14	-0.389466	0.762	0.913	2.29409e-09	mm10-Cd47
8.64956e-14	-0.3834	0.733	0.911	2.68612e-09	mm10-Lcp2
1.26739e-13	0.426274	0.861	0.759	3.93589e-09	mm10-Tpm3
1.31837e-13	-0.413781	0.524	0.78	4.09421e-09	mm10-Bach1
1.3883e-13	-0.195165	0.01	0.129	4.31135e-09	mm10-Ms4a6d
2.32846e-13	0.535217	0.487	0.255	7.23104e-09	mm10-Emd
2.60189e-13	-0.567651	0.27	0.514	8.08018e-09	mm10-Jaml
2.63039e-13	0.452861	0.374	0.15	8.16867e-09	mm10-Slc27a4
2.63484e-13	-0.351179	0.861	0.934	8.1825e-09	mm10-Themis2
2.78149e-13	-0.213461	0.113	0.325	8.63793e-09	mm10-H2-Aa
2.93939e-13	0.979231	0.49	0.315	9.12829e-09	mm10-Lcn2
3.07618e-13	-0.447181	0.581	0.764	9.55307e-09	mm10-Psmb9
3.23837e-13	-0.43665	0.118	0.341	1.00568e-08	mm10-Sh3bp2
3.69772e-13	-0.402693	0.353	0.598	1.14833e-08	mm10-Rab1a
3.71613e-13	-0.611699	0.076	0.278	1.15404e-08	mm10-Nceh1
4.42029e-13	-0.459245	0.118	0.336	1.37272e-08	mm10-Slc28a2
4.51281e-13	-0.43726	0.186	0.436	1.40145e-08	mm10-Map3k8
5.30748e-13	-0.443544	0.283	0.546	1.64824e-08	mm10-Abcg1
6.43829e-13	-0.238953	0.029	0.173	1.99941e-08	mm10-Ifi214
8.84674e-13	-0.463579	0.288	0.535	2.74736e-08	mm10-Dapp1
9.59854e-13	-0.479976	0.565	0.782	2.98083e-08	mm10-Rhoh
9.69547e-13	-0.464705	0.314	0.57	3.01093e-08	mm10-March5
9.72599e-13	-0.349622	0.887	0.971	3.02041e-08	mm10-Hspa5
1.02637e-12	-0.414799	0.62	0.824	3.18739e-08	mm10-Usp25
1.05085e-12	-0.484076	0.309	0.554	3.2634e-08	mm10-Hk3
1.08849e-12	-0.464146	0.338	0.596	3.38031e-08	mm10-Brd2
1.15318e-12	0.409263	0.982	0.969	3.58119e-08	mm10-Il1r2
1.21741e-12	-0.327137	0.304	0.564	3.78067e-08	mm10-Cers6
1.23389e-12	-0.376271	0.029	0.186	3.83185e-08	mm10-Ffar2
1.3654e-12	0.50175	0.725	0.556	4.24025e-08	mm10-Hif1a
1.64064e-12	0.505099	0.801	0.717	5.09501e-08	mm10-Jdp2
2.00507e-12	-0.403085	0.992	0.997	6.22676e-08	mm10-Ftl1
2.10146e-12	-0.29431	0.139	0.357	6.52609e-08	mm10-Trim21
2.13708e-12	0.442785	0.848	0.682	6.63669e-08	mm10-Coro1a
2.19535e-12	0.452942	0.736	0.525	6.81765e-08	mm10-Cyth4
2.53025e-12	0.29924	0.173	0.026	7.8577e-08	mm10-Ubxn2a
2.62557e-12	0.276406	0.995	0.997	8.15371e-08	mm10-Eif1
2.74451e-12	0.467603	0.545	0.318	8.52307e-08	mm10-Rnf11
2.89228e-12	0.190547	0.092	0	8.98199e-08	mm10-Hba-a2
3.3205e-12	0.385384	0.869	0.774	1.03118e-07	mm10-Ncf2
3.64624e-12	-0.373212	0.076	0.265	1.13234e-07	mm10-Fam53c
3.86438e-12	-1.28704	0.024	0.171	1.20008e-07	mm10-Cxcl9
4.15597e-12	-0.225858	0.982	0.982	1.29064e-07	mm10-Chmp4b
4.25073e-12	-0.389436	0.28	0.53	1.32006e-07	mm10-Laptm4a
4.25698e-12	0.852005	0.73	0.559	1.32201e-07	mm10-Retnlg
4.45696e-12	-0.485124	0.264	0.517	1.38411e-07	mm10-Fam46a
5.02602e-12	0.393349	0.715	0.593	1.56083e-07	mm10-Selenok
5.43744e-12	-0.480941	0.272	0.522	1.6886e-07	mm10-Ehd4
5.54582e-12	0.372829	0.825	0.74	1.72225e-07	mm10-Sorl1
6.55083e-12	0.611332	0.435	0.223	2.03436e-07	mm10-Fosb
6.84031e-12	-0.35882	0.055	0.231	2.12426e-07	mm10-Fam84b
7.22298e-12	-0.419778	0.448	0.664	2.2431e-07	mm10-Zcchc2
7.41979e-12	-0.45292	0.094	0.294	2.30422e-07	mm10-Ly6i
7.76954e-12	-0.484882	0.314	0.535	2.41283e-07	mm10-Vav1
7.98866e-12	0.729761	0.571	0.415	2.48088e-07	mm10-Nktr
8.3324e-12	-0.301106	0.83	0.937	2.58763e-07	mm10-Tap1
8.46172e-12	-0.427649	0.694	0.84	2.62779e-07	mm10-Arf4
1.03951e-11	-0.44923	0.013	0.139	3.22819e-07	mm10-Slamf7
1.04565e-11	-0.504531	0.06	0.236	3.24727e-07	mm10-Fam46c
1.18453e-11	-0.542877	0.254	0.467	3.67854e-07	mm10-Atp6v1b2
1.20735e-11	0.313769	0.995	0.979	3.74943e-07	mm10-Rnf149
1.24038e-11	0.350854	0.963	0.916	3.85199e-07	mm10-Trem1
1.26225e-11	-0.420533	0.366	0.604	3.9199e-07	mm10-Bst2
1.35416e-11	0.370584	1	1	4.20534e-07	mm10-Fth1
1.39567e-11	-0.35786	0.228	0.47	4.33426e-07	mm10-Milr1
1.54333e-11	0.427919	0.251	0.076	4.7928e-07	mm10-Sephs2
1.59102e-11	-0.424141	0.476	0.682	4.9409e-07	mm10-H13
1.59127e-11	-0.448827	0.277	0.525	4.94168e-07	mm10-Ifit1bl2
1.6692e-11	0.418006	0.869	0.777	5.18371e-07	mm10-Ell2
1.67507e-11	-0.408069	0.264	0.501	5.20194e-07	mm10-Nub1
1.74896e-11	0.453905	0.437	0.257	5.43138e-07	mm10-Cyth1
1.84355e-11	-0.538927	0.031	0.171	5.72513e-07	mm10-Batf2
2.10167e-11	0.504818	0.264	0.081	6.52674e-07	mm10-Arrdc3
2.1284e-11	0.389941	0.725	0.533	6.60975e-07	mm10-Map2k3
2.33145e-11	-0.352411	0.065	0.228	7.24032e-07	mm10-Snx2
2.84109e-11	-0.464152	0.055	0.223	8.82302e-07	mm10-Rasgef1b
2.90512e-11	0.423894	0.649	0.493	9.02185e-07	mm10-Aldoa
3.17098e-11	0.537379	0.644	0.441	9.84747e-07	mm10-Slc11a1
3.87456e-11	0.455479	0.285	0.108	1.20324e-06	mm10-Rasa2
4.03928e-11	-0.446069	0.552	0.753	1.2544e-06	mm10-Ptk2b
4.31596e-11	0.401377	0.827	0.661	1.34032e-06	mm10-Ehd1
4.45498e-11	-0.364685	0.136	0.344	1.38349e-06	mm10-Arel1
4.88793e-11	-0.388576	0.188	0.415	1.51795e-06	mm10-Slc40a1
5.11248e-11	0.458648	0.476	0.255	1.58768e-06	mm10-Gpcpd1
5.14068e-11	0.343228	0.935	0.929	1.59644e-06	mm10-Cox17
5.32416e-11	-0.326428	0.034	0.178	1.65342e-06	mm10-Olfml2b
5.70121e-11	0.365847	0.715	0.577	1.77051e-06	mm10-Myl12a
6.20819e-11	-0.243182	0.997	1	1.92795e-06	mm10-Acod1
6.49905e-11	-0.320046	0.366	0.612	2.01828e-06	mm10-Parp12
6.85737e-11	0.460982	0.364	0.16	2.12956e-06	mm10-Gcnt1
7.44922e-11	0.352074	0.662	0.483	2.31336e-06	mm10-Pak2
8.03051e-11	0.449549	0.822	0.706	2.49387e-06	mm10-Nfkb1
9.74238e-11	-0.373382	0.767	0.887	3.0255e-06	mm10-Casp4
1.03942e-10	-0.366419	0.236	0.462	3.22792e-06	mm10-Psmb10
1.14738e-10	0.342559	0.827	0.772	3.56318e-06	mm10-Rac2
1.18972e-10	0.422028	0.309	0.115	3.69467e-06	mm10-Slc22a15
1.23562e-10	-0.401753	0.162	0.37	3.83721e-06	mm10-Lmo2
1.23983e-10	-0.421139	0.306	0.528	3.85029e-06	mm10-Vcpip1
1.23986e-10	-0.356613	0.249	0.48	3.85039e-06	mm10-Uba7
1.25448e-10	0.414324	0.817	0.664	3.89579e-06	mm10-Rabgef1
1.27703e-10	-0.474794	0.73	0.866	3.96581e-06	mm10-Ifi27l2a
1.34562e-10	-0.658124	0.136	0.336	4.17883e-06	mm10-Steap4
1.35779e-10	0.399844	0.636	0.457	4.21663e-06	mm10-Prkar1a
1.38306e-10	-0.325309	0.068	0.239	4.29511e-06	mm10-Pdk3
1.38387e-10	-0.371455	0.652	0.835	4.29762e-06	mm10-Mpeg1
1.44882e-10	-0.379867	0.634	0.785	4.49932e-06	mm10-Helz2
1.66847e-10	0.525039	0.343	0.181	5.18145e-06	mm10-Dgat2
1.83108e-10	0.470912	0.565	0.404	5.68642e-06	mm10-Antxr2
1.85861e-10	0.296591	0.798	0.74	5.77191e-06	mm10-Rps21
1.86063e-10	-0.484423	0.246	0.467	5.77819e-06	mm10-Cd74
2.00095e-10	0.438746	0.555	0.349	6.21396e-06	mm10-D8Ertd738e
2.0651e-10	0.545347	0.788	0.635	6.41316e-06	mm10-Bcl2a1b
2.09819e-10	0.631495	0.56	0.365	6.51594e-06	mm10-Lrg1
2.15828e-10	-0.362344	0.322	0.559	6.70255e-06	mm10-Ugcg
2.42687e-10	-0.389437	0.092	0.26	7.53665e-06	mm10-Tcirg1
2.44274e-10	0.326176	0.895	0.864	7.58592e-06	mm10-Pfn1
2.5109e-10	-0.22062	0.016	0.134	7.7976e-06	mm10-Arg1
2.68023e-10	-0.305915	0.047	0.199	8.32346e-06	mm10-Gm5431
2.76819e-10	0.668358	0.458	0.255	8.59661e-06	mm10-Bcl2a1a
2.85015e-10	0.504361	0.99	0.953	8.85114e-06	mm10-S100a8
2.94013e-10	-0.274497	0.058	0.218	9.13057e-06	mm10-Slc25a22
2.95325e-10	0.430741	0.589	0.388	9.17131e-06	mm10-Eno1
3.13585e-10	-0.384757	0.115	0.307	9.73837e-06	mm10-Atp6v1c1
3.23486e-10	0.336008	0.827	0.701	1.00459e-05	mm10-Rpl9
3.34691e-10	-0.526577	0.016	0.131	1.03938e-05	mm10-Iigp1
3.58272e-10	0.360597	0.694	0.475	1.11261e-05	mm10-Arih2
3.6134e-10	0.318907	0.979	0.953	1.12214e-05	mm10-Kdm6b
3.8552e-10	-0.328243	0.848	0.95	1.19723e-05	mm10-Klf6
4.09733e-10	-0.224678	0.997	0.997	1.27243e-05	mm10-Sdcbp
4.3581e-10	-0.392924	0.56	0.711	1.35341e-05	mm10-Myd88
4.37628e-10	0.426067	0.267	0.105	1.35905e-05	mm10-Mfsd6
5.12535e-10	0.407209	0.66	0.512	1.59168e-05	mm10-Slc25a3
5.14305e-10	-0.342294	0.165	0.373	1.59717e-05	mm10-Atp2c1
5.36026e-10	0.351877	0.961	0.89	1.66463e-05	mm10-Pnrc1
5.535e-10	-0.348209	0.555	0.761	1.7189e-05	mm10-Gdap10
5.78351e-10	-0.412252	0.131	0.323	1.79607e-05	mm10-Ccdc25
5.87327e-10	-0.230113	0.903	0.979	1.82394e-05	mm10-Sp100
6.8706e-10	0.352812	0.856	0.714	2.13367e-05	mm10-C5ar1
7.66839e-10	0.344909	0.921	0.887	2.38142e-05	mm10-Atp2b1
7.89138e-10	0.409968	0.419	0.239	2.45067e-05	mm10-Fbxo11
8.96029e-10	-0.429139	0.408	0.591	2.78262e-05	mm10-Tspan13
1.09087e-09	0.345129	0.775	0.63	3.38771e-05	mm10-Rps13
1.15016e-09	-0.424682	0.223	0.438	3.57181e-05	mm10-Gns
1.17916e-09	0.35007	0.796	0.606	3.66189e-05	mm10-Ccl6
1.194e-09	0.423314	0.338	0.157	3.70798e-05	mm10-Irak3
1.27744e-09	-0.367447	0.707	0.858	3.9671e-05	mm10-Arid5a
1.34119e-09	-0.387045	0.272	0.475	4.16507e-05	mm10-Tbrg1
1.38523e-09	-0.450834	0.031	0.163	4.30182e-05	mm10-Ccl2
1.4057e-09	-0.417801	0.474	0.675	4.36541e-05	mm10-Ifitm6
1.43538e-09	0.274162	0.856	0.824	4.45757e-05	mm10-Gng5
1.4373e-09	0.421264	0.466	0.26	4.46353e-05	mm10-Smim3
1.47211e-09	0.735531	0.168	0.045	4.57163e-05	mm10-mt-Nd4l
1.47449e-09	-0.488928	0.45	0.643	4.57904e-05	mm10-Cass4
1.54486e-09	0.354319	0.741	0.562	4.79757e-05	mm10-Gsr
1.55335e-09	-0.283971	0.364	0.593	4.82393e-05	mm10-Mycbp2
1.65495e-09	0.663734	0.346	0.181	5.13945e-05	mm10-F630028O10Rik
1.76859e-09	0.320792	0.825	0.735	5.49236e-05	mm10-Rpl37a
1.77697e-09	0.398307	0.741	0.64	5.51839e-05	mm10-Adam8
2.08477e-09	-0.290334	0.589	0.795	6.47426e-05	mm10-Rap2c
2.09621e-09	0.400391	0.338	0.194	6.50977e-05	mm10-Msl2
2.21994e-09	-0.339335	0.039	0.173	6.89401e-05	mm10-Amotl2
2.23346e-09	0.422085	0.654	0.478	6.936e-05	mm10-Cux1
2.33976e-09	-0.56105	0.11	0.289	7.26611e-05	mm10-Ifi206
2.36915e-09	0.380977	0.246	0.092	7.35739e-05	mm10-Slc25a33
2.43782e-09	-0.268477	0.649	0.824	7.57066e-05	mm10-Parp9
2.44076e-09	-0.376358	0.628	0.808	7.5798e-05	mm10-Ptpn1
2.47097e-09	0.476525	0.866	0.764	7.67361e-05	mm10-Nlrp3
2.48936e-09	0.420236	0.393	0.22	7.7307e-05	mm10-Ralgapa1
2.49555e-09	-0.331239	0.12	0.302	7.74992e-05	mm10-Acer3
2.49658e-09	0.439888	0.432	0.231	7.75314e-05	mm10-Ankrd11
2.51066e-09	0.32111	0.199	0.052	7.79686e-05	mm10-Srrd
2.59032e-09	-0.34238	0.393	0.614	8.04425e-05	mm10-Hk1
2.67437e-09	-0.311851	0.22	0.43	8.30527e-05	mm10-Slfn9
2.84001e-09	-0.352884	0.228	0.436	8.81964e-05	mm10-Jpt1
3.0673e-09	0.335788	0.545	0.394	9.5255e-05	mm10-Arpc4
3.24126e-09	-0.288834	0.895	0.961	0.000100657	mm10-Itm2b
3.43721e-09	0.313811	0.66	0.449	0.000106743	mm10-Rps3a1
3.62082e-09	-0.395002	0.183	0.323	0.000112444	mm10-Prpf38a
3.71297e-09	-0.189085	0.008	0.102	0.000115306	mm10-Mafb
4.00174e-09	-0.293835	0.898	0.963	0.000124274	mm10-Msn
4.14018e-09	0.407817	0.791	0.682	0.000128573	mm10-Ncf1
4.24381e-09	-0.215025	0.016	0.118	0.000131791	mm10-Lgals1
4.47053e-09	0.580765	0.531	0.331	0.000138832	mm10-Nr4a1
4.85011e-09	-0.304902	0.092	0.255	0.00015062	mm10-Stk19
5.00876e-09	-0.205801	0.872	0.971	0.000155547	mm10-Slfn1
5.17689e-09	-0.395888	0.304	0.499	0.000160768	mm10-Stk24
6.32453e-09	-0.401935	0.419	0.622	0.000196408	mm10-Mapk6
6.50875e-09	0.269199	1	0.997	0.000202129	mm10-H3f3b
6.89009e-09	0.384154	0.607	0.417	0.000213972	mm10-Sbno1
7.10632e-09	0.394192	0.804	0.646	0.000220687	mm10-Rbpj
7.26011e-09	0.43205	0.461	0.286	0.000225463	mm10-Per1
8.09413e-09	-0.535667	0.84	0.903	0.000251363	mm10-Ifitm1
8.09593e-09	0.342007	0.61	0.459	0.000251419	mm10-Rpl8
8.54758e-09	-0.343415	0.113	0.283	0.000265445	mm10-Larp1
8.93896e-09	0.446178	0.364	0.213	0.0002776	mm10-Cdk11b
9.44297e-09	0.200057	0.089	0.005	0.000293252	mm10-Hba-a1
9.75684e-09	-0.210226	0.029	0.142	0.000302999	mm10-Rmdn3
1.02221e-08	-0.431639	0.134	0.31	0.000317447	mm10-Tec
1.02446e-08	0.29871	0.196	0.058	0.000318146	mm10-Galnt11
1.02578e-08	-0.343512	0.249	0.454	0.000318555	mm10-Tor1aip2
1.04058e-08	0.280915	0.843	0.793	0.000323153	mm10-Rps16
1.05116e-08	0.430678	0.542	0.346	0.000326437	mm10-P4hb
1.10211e-08	0.252872	0.28	0.11	0.00034226	mm10-Klhl2
1.12666e-08	0.454452	0.424	0.273	0.000349885	mm10-Cwc25
1.16563e-08	-0.477576	0.196	0.375	0.000361986	mm10-Cycs
1.20877e-08	0.227897	0.99	0.971	0.000375382	mm10-Tpd52
1.22815e-08	-0.299063	0.683	0.843	0.000381403	mm10-Irf2
1.23967e-08	-0.163962	0.545	0.751	0.000384979	mm10-Irgm2
1.36386e-08	-0.278283	0.62	0.803	0.000423546	mm10-Epsti1
1.38933e-08	-0.159413	0.144	0.312	0.000431456	mm10-H2-Eb1
1.49081e-08	-0.577059	0.5	0.646	0.000462971	mm10-Sod2
1.53728e-08	-0.36044	0.353	0.556	0.000477402	mm10-Pdcd10
1.59969e-08	0.582196	0.254	0.105	0.000496784	mm10-Gpr84
1.60208e-08	-0.498856	0.479	0.591	0.000497526	mm10-Bri3
1.60913e-08	-0.188641	0.008	0.097	0.000499716	mm10-Cd40
1.66733e-08	0.249251	0.191	0.055	0.000517789	mm10-Gm11808
1.73499e-08	-0.304447	0.081	0.236	0.000538801	mm10-B4galt5
1.81738e-08	0.382773	0.38	0.223	0.000564388	mm10-Nop53
1.86089e-08	0.270234	0.877	0.782	0.000577899	mm10-Cdc42
1.95925e-08	-0.228386	0.118	0.281	0.000608444	mm10-Dnajc13
2.01544e-08	0.320711	0.812	0.698	0.000625894	mm10-Rpl35a
2.05591e-08	-0.160611	0.008	0.094	0.000638462	mm10-Mrc1
2.05979e-08	0.52359	0.408	0.226	0.000639667	mm10-Bcl2a1d
2.19106e-08	-0.484604	0.796	0.858	0.000680433	mm10-Ctsd
2.20016e-08	0.385105	0.382	0.231	0.000683261	mm10-Ifnar1
2.20404e-08	-0.45268	0.628	0.785	0.000684465	mm10-Ctsb
2.63608e-08	-0.533319	0.804	0.874	0.000818635	mm10-Csf1
2.64382e-08	-0.258974	0.558	0.759	0.000821039	mm10-Zfp281
2.85082e-08	-0.294684	0.076	0.226	0.000885321	mm10-Ccdc86
2.92007e-08	-0.456564	0.241	0.415	0.000906826	mm10-5430427O19Rik
2.94116e-08	-0.191795	0.99	0.997	0.000913376	mm10-Grina
2.99019e-08	-0.516478	0.369	0.504	0.000928604	mm10-Dedd2
3.20755e-08	0.272901	0.128	0.024	0.000996104	mm10-AI839979
3.32878e-08	-0.238574	0.06	0.199	0.00103375	mm10-Lgmn
3.38737e-08	-0.279497	0.416	0.627	0.00105195	mm10-Nod1
3.50941e-08	-0.415567	0.092	0.241	0.00108985	mm10-Oat
3.98907e-08	0.239163	0.935	0.908	0.0012388	mm10-Rps29
4.11276e-08	-0.328531	0.406	0.609	0.00127722	mm10-Vps54
4.43232e-08	-0.263959	0.34	0.549	0.00137646	mm10-Adar
4.6221e-08	-0.187215	0.008	0.089	0.00143539	mm10-Clec4a1
4.64299e-08	-0.134795	0.003	0.076	0.00144188	mm10-Ccl8
4.84888e-08	0.28932	0.979	0.982	0.00150582	mm10-S100a11
4.96118e-08	0.270716	0.825	0.654	0.00154069	mm10-Alox5ap
5.26083e-08	0.278953	0.186	0.058	0.00163375	mm10-Adgrg3
5.35201e-08	0.339249	0.935	0.861	0.00166207	mm10-Clec4e
5.43773e-08	0.28687	0.733	0.635	0.00168869	mm10-Atp5e
6.07772e-08	0.213387	0.971	0.987	0.00188744	mm10-H3f3a
6.08928e-08	-0.321438	0.783	0.879	0.00189103	mm10-Tax1bp1
6.12429e-08	0.361745	0.411	0.283	0.0019019	mm10-Sh2b2
6.14864e-08	-0.21685	0.285	0.48	0.00190946	mm10-Vim
6.45796e-08	-0.26883	0.751	0.885	0.00200552	mm10-H2-Q4
6.74646e-08	-0.322218	0.568	0.738	0.00209511	mm10-Psme1
6.93904e-08	0.331366	0.688	0.528	0.00215492	mm10-Rps28
6.99766e-08	0.383065	0.382	0.223	0.00217312	mm10-Tpst2
7.19142e-08	-0.304167	0.563	0.753	0.00223329	mm10-Trim56
7.3964e-08	0.339394	0.304	0.136	0.00229695	mm10-Rb1cc1
7.49237e-08	0.306424	0.788	0.774	0.00232676	mm10-Vmp1
8.03525e-08	-0.300002	0.031	0.144	0.00249535	mm10-Dek
8.13616e-08	0.308462	0.338	0.163	0.00252668	mm10-Adipor2
8.39333e-08	0.335008	0.317	0.152	0.00260655	mm10-Brd4
8.59271e-08	-0.26773	0.063	0.194	0.00266847	mm10-Hist3h2a
8.71637e-08	0.24441	0.901	0.903	0.00270687	mm10-Myl6
9.81783e-08	0.312268	0.298	0.155	0.00304893	mm10-Mtmr6
1.01128e-07	0.310216	0.702	0.622	0.00314053	mm10-Fgr
1.03968e-07	-0.187534	0.018	0.115	0.00322873	mm10-Ppm1k
1.06155e-07	0.346915	0.814	0.696	0.00329663	mm10-Csf2ra
1.06426e-07	0.390465	0.497	0.373	0.00330505	mm10-Zfp263
1.07794e-07	0.321142	0.435	0.247	0.00334755	mm10-Tmed10
1.1066e-07	0.221335	0.971	0.924	0.00343655	mm10-Rps9
1.12551e-07	0.339129	0.531	0.349	0.00349527	mm10-Braf
1.1319e-07	-0.206184	0.013	0.097	0.00351512	mm10-Nos2
1.1416e-07	0.32939	0.474	0.328	0.00354522	mm10-Med7
1.17352e-07	0.349563	0.285	0.131	0.00364436	mm10-Tfip11
1.20406e-07	-0.308177	0.086	0.234	0.00373922	mm10-Fmnl2
1.21781e-07	0.292585	0.872	0.827	0.00378191	mm10-Rps27a
1.22476e-07	0.351572	0.793	0.69	0.0038035	mm10-Rpl37
1.29677e-07	-0.271796	0.068	0.205	0.0040271	mm10-Tmem2
1.36544e-07	0.277027	0.241	0.092	0.00424038	mm10-Eml4
1.38438e-07	0.333023	0.51	0.318	0.00429919	mm10-Lrrc25
1.38453e-07	0.285202	0.806	0.709	0.00429965	mm10-Rhoa
1.38592e-07	-0.306484	0.401	0.598	0.00430398	mm10-Pcgf5
1.39536e-07	-0.253395	0.063	0.192	0.00433329	mm10-Gm47283
1.39618e-07	0.275713	0.798	0.656	0.00433583	mm10-Rps10
1.42327e-07	0.216	0.99	0.969	0.00441998	mm10-Entpd1
1.43928e-07	0.299024	0.887	0.793	0.00446968	mm10-Actr3
1.48877e-07	-0.225589	0.081	0.22	0.00462339	mm10-Rap1gds1
1.60381e-07	0.293895	0.798	0.709	0.00498064	mm10-Rps12
1.62929e-07	0.288658	0.628	0.48	0.00505976	mm10-Pfdn5
1.65189e-07	0.841243	0.144	0.052	0.00512995	mm10-mt-Atp8
1.76096e-07	0.468554	0.976	0.974	0.00546865	mm10-Junb
1.88288e-07	-0.274046	0.131	0.294	0.0058473	mm10-Phc2
1.88682e-07	0.413309	0.668	0.517	0.00585953	mm10-Wnk1
1.90598e-07	-0.247534	0.288	0.483	0.00591902	mm10-Tdrd7
1.91285e-07	-0.082372	0	0.052	0.00594035	mm10-Mdfic
1.95678e-07	0.388886	0.62	0.472	0.00607677	mm10-Prdx6
1.98017e-07	-0.177657	0.026	0.123	0.00614941	mm10-Ccr5
2.03779e-07	0.397002	0.317	0.446	0.00632837	mm10-Spp1
2.12871e-07	0.423087	0.377	0.22	0.00661072	mm10-Slc16a6
2.18642e-07	-0.291953	0.338	0.533	0.00678993	mm10-Xpo6
2.20202e-07	-0.239062	0.058	0.178	0.00683837	mm10-Pold3
2.24494e-07	0.288648	0.215	0.087	0.00697166	mm10-Ube2j1
2.31132e-07	-0.136449	0.974	0.997	0.00717779	mm10-Oasl2
2.33842e-07	-0.336476	0.212	0.388	0.00726195	mm10-Grn
2.36028e-07	-0.414994	0.233	0.407	0.00732984	mm10-Arid4a
2.38196e-07	0.320863	0.953	0.937	0.00739717	mm10-S100a6
2.40258e-07	-0.451687	0.312	0.493	0.0074612	mm10-Tmem33
2.45809e-07	0.410695	0.335	0.173	0.00763358	mm10-Phlda1
2.46109e-07	-0.381564	0.128	0.289	0.00764291	mm10-Rnd1
2.48658e-07	0.40734	0.298	0.15	0.00772208	mm10-Fpr1
2.51453e-07	0.293587	0.783	0.617	0.00780887	mm10-Ptp4a1
2.54834e-07	0.289082	0.079	0.005	0.00791386	mm10-mt-Nd6
2.5539e-07	0.359312	0.476	0.299	0.00793112	mm10-Alcam
2.6836e-07	-0.228016	0.026	0.115	0.00833393	mm10-Tnfsf10
2.71909e-07	-0.311171	0.665	0.803	0.00844415	mm10-Trim25
2.84386e-07	-0.350363	0.188	0.365	0.0088316	mm10-Itga4
3.02451e-07	-0.145698	0.008	0.084	0.00939261	mm10-Rgl1
3.03983e-07	-0.395097	0.23	0.404	0.0094402	mm10-Tatdn2
3.07509e-07	0.504156	0.293	0.147	0.00954968	mm10-Cdc42ep3
3.07859e-07	-0.397779	0.094	0.236	0.00956056	mm10-Prnp
3.20802e-07	-0.279817	0.042	0.155	0.00996249	mm10-Gm12185
3.22614e-07	0.377652	0.17	0.052	0.0100188	mm10-Cd93
3.265e-07	0.925845	0.249	0.144	0.0101395	mm10-mt-Nd3
3.32326e-07	-0.289695	0.207	0.386	0.0103204	mm10-Snap29
3.36963e-07	1.01828	0.335	0.291	0.0104644	mm10-mt-Nd1
3.44267e-07	-0.32834	0.165	0.333	0.0106912	mm10-Rab9
3.45502e-07	-0.334704	0.199	0.367	0.0107296	mm10-Whamm
3.4637e-07	1.12667	0.51	0.493	0.0107565	mm10-mt-Nd4
3.8756e-07	0.358528	0.403	0.247	0.0120357	mm10-Pdlim5
4.09896e-07	1.20428	0.377	0.325	0.0127293	mm10-mt-Nd2
4.12177e-07	-0.302676	0.401	0.577	0.0128002	mm10-Oas1a
4.12705e-07	0.414984	0.51	0.383	0.0128165	mm10-Ldha
4.20492e-07	0.328661	0.262	0.126	0.0130584	mm10-Pfkl
4.21773e-07	-0.184111	0.016	0.102	0.0130982	mm10-Gm33370
4.27016e-07	-0.222805	0.162	0.323	0.013261	mm10-Smg7
4.30159e-07	-0.175019	0.029	0.129	0.0133586	mm10-Adam9
4.57297e-07	-0.244513	0.084	0.22	0.0142014	mm10-Tgtp1
4.5758e-07	0.328075	0.62	0.491	0.0142102	mm10-Rpl21
4.8671e-07	-0.159938	0.021	0.108	0.0151148	mm10-March1
4.87844e-07	-0.347916	0.631	0.709	0.01515	mm10-Mbnl2
4.99199e-07	-0.275668	0.081	0.218	0.0155026	mm10-Clcn7
5.13783e-07	-0.32614	0.06	0.178	0.0159555	mm10-Fam102a
5.20916e-07	0.277792	0.767	0.693	0.016177	mm10-Rpl27a
5.23027e-07	-0.196026	0.016	0.102	0.0162426	mm10-Med17
5.39064e-07	-0.230582	0.152	0.31	0.0167406	mm10-Apobec1
5.64093e-07	-0.078936	0.005	0.06	0.0175179	mm10-Ccl12
5.83191e-07	-0.2869	0.118	0.268	0.018111	mm10-Stxbp5
5.99629e-07	0.32206	0.628	0.488	0.0186215	mm10-Rps8
6.38206e-07	0.32053	0.395	0.241	0.0198195	mm10-Cd300a
6.46194e-07	0.275971	0.173	0.055	0.0200675	mm10-Zfyve26
6.50432e-07	-0.0922255	0.003	0.063	0.0201992	mm10-Ms4a6b
6.82961e-07	0.293214	0.288	0.173	0.0212094	mm10-Smim14
7.00579e-07	0.399655	0.401	0.268	0.0217565	mm10-Fam107b
7.3353e-07	0.277174	0.762	0.646	0.0227798	mm10-Inpp5d
7.37067e-07	0.337766	0.393	0.231	0.0228896	mm10-Bcl10
7.48404e-07	0.302862	0.67	0.538	0.0232417	mm10-Rhog
7.62653e-07	1.34554	0.526	0.507	0.0236842	mm10-mt-Cytb
7.71025e-07	-0.343326	0.191	0.36	0.0239442	mm10-Creb5
7.8768e-07	-0.170883	0.018	0.105	0.0244614	mm10-Mx1
8.00025e-07	-0.304668	0.45	0.622	0.0248448	mm10-Ubl3
8.03518e-07	-0.139727	0.406	0.588	0.0249532	mm10-Gm21188
8.1142e-07	0.324571	0.644	0.47	0.0251987	mm10-Por
8.1253e-07	-0.264161	0.081	0.207	0.0252331	mm10-Psme4
8.18594e-07	0.288417	0.238	0.11	0.0254215	mm10-Tbc1d23
8.35286e-07	-0.366118	0.092	0.226	0.0259398	mm10-Stxbp3
8.83186e-07	-0.367762	0.387	0.556	0.0274274	mm10-Ddit3
8.83824e-07	0.36642	0.699	0.638	0.0274472	mm10-Nudt4
9.01642e-07	-0.352368	0.38	0.551	0.0280005	mm10-Treml2
9.02142e-07	-0.148691	0.013	0.094	0.028016	mm10-Sdc3
9.36525e-07	0.361148	0.49	0.36	0.0290838	mm10-Usmg5
9.58966e-07	0.362964	0.442	0.286	0.0297807	mm10-Ripor2
9.78135e-07	-0.319669	0.366	0.525	0.030376	mm10-Ftl1-ps1
9.88398e-07	-0.392132	0.322	0.488	0.0306947	mm10-Cish
1.01329e-06	-0.158282	0.016	0.1	0.0314678	mm10-Mid1
1.03428e-06	0.286565	0.306	0.178	0.0321195	mm10-Rpsa
1.06959e-06	0.513312	0.348	0.22	0.0332161	mm10-Hspa4l
1.07034e-06	-0.16425	0.016	0.1	0.0332395	mm10-2010111I01Rik
1.10363e-06	-0.201568	0.12	0.262	0.0342734	mm10-4930430E12Rik
1.12385e-06	0.254781	0.974	0.974	0.034901	mm10-Pim1
1.15056e-06	0.229425	0.131	0.039	0.0357306	mm10-Tmco6
1.16663e-06	0.155736	0.819	0.864	0.0362296	mm10-Serf2
1.19183e-06	-0.231884	0.147	0.302	0.0370122	mm10-H2-Ab1
1.21248e-06	0.318743	0.534	0.357	0.0376536	mm10-Ski
1.23425e-06	0.267454	0.285	0.168	0.0383296	mm10-Vamp4
1.27871e-06	0.365095	0.421	0.265	0.0397104	mm10-Isy1
1.29486e-06	0.288137	0.322	0.173	0.0402119	mm10-Mdh2
1.29651e-06	-0.286737	0.317	0.501	0.040263	mm10-Psma7
1.31945e-06	-0.0567197	0.026	0.089	0.0409754	mm10-Lrp1
1.33126e-06	-0.169357	0.901	0.971	0.0413422	mm10-Zfp36
1.35122e-06	0.312966	0.298	0.218	0.041962	mm10-Ik
1.37259e-06	-0.154175	0.018	0.102	0.0426258	mm10-Rasa4
1.47953e-06	-0.25712	0.037	0.139	0.0459469	mm10-Scimp
1.55225e-06	0.266092	0.414	0.239	0.048205	mm10-Ncor1
1.56628e-06	0.344272	0.298	0.173	0.0486409	mm10-Msra
1.60296e-06	-0.298258	0.055	0.171	0.0497798	mm10-Ifi213
1.64477e-06	-0.193284	0.021	0.108	0.0510785	mm10-Dyrk2
1.64849e-06	0.327084	0.401	0.236	0.0511939	mm10-Apbb1ip
1.69606e-06	-0.325968	0.225	0.375	0.052671	mm10-Evi2a
1.69875e-06	-0.113089	0.008	0.073	0.0527547	mm10-Il7r
1.78184e-06	-0.319887	0.016	0.097	0.055335	mm10-Nrg1
1.81886e-06	0.379671	0.919	0.921	0.0564846	mm10-Ier3
1.87659e-06	-0.278472	0.654	0.787	0.0582775	mm10-Ranbp2
1.94997e-06	0.192428	0.123	0.031	0.0605563	mm10-Ndufa12
1.955e-06	-0.304601	0.131	0.27	0.0607126	mm10-Dcp2
2.02195e-06	-0.339091	0.634	0.785	0.0627918	mm10-Psap
2.07651e-06	0.285843	0.411	0.241	0.064486	mm10-Gpx4
2.21258e-06	0.217881	0.113	0.026	0.0687116	mm10-Fam120b
2.22838e-06	-0.39269	0.455	0.614	0.0692023	mm10-Lasp1
2.3203e-06	0.224485	0.136	0.037	0.0720568	mm10-Med14
2.34701e-06	0.273085	0.526	0.367	0.0728863	mm10-Ndufa7
2.45105e-06	-0.235335	0.068	0.186	0.0761174	mm10-Arl1
2.45701e-06	-0.265558	0.576	0.738	0.0763024	mm10-Il15
2.48753e-06	0.246593	0.141	0.05	0.0772502	mm10-Snapc1
2.50554e-06	0.279485	0.618	0.441	0.0778097	mm10-Bcl3
2.51434e-06	-0.248361	0.058	0.168	0.0780827	mm10-Tmem67
2.6914e-06	0.278674	0.73	0.669	0.0835815	mm10-Rpl39
2.80062e-06	-0.335643	0.144	0.294	0.0869731	mm10-Dock10
2.80343e-06	0.260807	0.277	0.142	0.0870606	mm10-Ap2b1
2.81587e-06	1.63144	0.812	0.756	0.0874469	mm10-mt-Atp6
2.88106e-06	0.32591	0.649	0.53	0.0894713	mm10-Dnaja1
2.91932e-06	0.291802	0.427	0.268	0.0906595	mm10-Dph3
2.9599e-06	0.255164	0.801	0.727	0.0919197	mm10-Rpl18a
2.999e-06	0.180409	0.102	0.021	0.0931338	mm10-9830107B12Rik
3.02389e-06	-0.178858	0.045	0.147	0.0939069	mm10-Cdt1
3.05707e-06	-0.322009	0.403	0.567	0.0949374	mm10-Tap2
3.148e-06	-0.310433	0.361	0.517	0.0977612	mm10-Sirpa
3.48551e-06	-0.177166	0.042	0.144	0.108243	mm10-Slc25a12
3.58338e-06	0.297452	0.306	0.155	0.111282	mm10-Ssh2
3.61094e-06	-0.284935	0.073	0.192	0.112138	mm10-Pcna
3.61955e-06	0.235986	0.162	0.052	0.112405	mm10-Sesn2
3.63669e-06	-0.346568	0.372	0.533	0.112938	mm10-Elf1
3.68029e-06	-0.0753546	0	0.042	0.114291	mm10-P2rx7
3.68035e-06	0.216411	0.188	0.071	0.114293	mm10-Pofut2
3.68161e-06	0.325936	0.223	0.105	0.114332	mm10-Mpp7
3.74865e-06	-0.341058	0.301	0.423	0.116414	mm10-Abtb2
3.81632e-06	-0.225203	0.11	0.247	0.118516	mm10-9930111J21Rik1
3.8284e-06	-0.166014	0.021	0.105	0.118891	mm10-A930015D03Rik
3.94383e-06	-0.360149	0.204	0.362	0.122476	mm10-Slc31a2
3.96558e-06	0.147073	0.076	0.01	0.123151	mm10-Krt13
4.00468e-06	0.362348	0.508	0.362	0.124365	mm10-Xylt1
4.19414e-06	-0.097603	0.003	0.058	0.130249	mm10-Evl
4.21543e-06	-0.181874	0.23	0.388	0.13091	mm10-Cdk9
4.24917e-06	0.286683	0.618	0.491	0.131958	mm10-Ncf4
4.35425e-06	0.355963	0.442	0.304	0.135221	mm10-Actn1
4.39872e-06	-0.215338	0.249	0.412	0.136602	mm10-4930523C07Rik
4.46754e-06	0.275913	0.746	0.612	0.138739	mm10-Rpl34
4.65825e-06	0.365982	0.416	0.323	0.144662	mm10-Smad7
4.81218e-06	0.306717	0.804	0.727	0.149442	mm10-Efhd2
4.85389e-06	0.211681	0.079	0.013	0.150737	mm10-Ss18l2
4.89735e-06	0.259329	0.346	0.189	0.152087	mm10-Ppp4c
4.98286e-06	0.370869	0.463	0.32	0.154743	mm10-Gpr132
5.02737e-06	0.403853	0.995	0.979	0.156125	mm10-S100a9
5.11453e-06	-0.324329	0.073	0.181	0.158832	mm10-Ccl5
5.14319e-06	-0.324806	0.128	0.265	0.159722	mm10-Gpr141
5.16389e-06	0.314228	0.228	0.11	0.160365	mm10-Lamb3
5.26858e-06	-0.232318	0.115	0.252	0.163616	mm10-Gm12216
5.27374e-06	0.355108	0.628	0.535	0.163776	mm10-Suco
5.45274e-06	-0.203334	0.613	0.774	0.169335	mm10-Gm13822
5.54953e-06	-0.236608	0.102	0.231	0.172341	mm10-St6galnac4
5.56617e-06	0.233637	0.204	0.084	0.172858	mm10-Rnf40
5.576e-06	0.310782	0.445	0.325	0.173163	mm10-Ppp2ca
5.63345e-06	-0.287388	0.56	0.672	0.174947	mm10-Psme2
5.72271e-06	0.256643	0.728	0.601	0.177719	mm10-Rps25
5.72805e-06	-0.290478	0.149	0.294	0.177885	mm10-Amdhd2
5.73761e-06	-0.0402031	0.743	0.874	0.178181	mm10-Trim30d
6.18542e-06	0.324605	0.51	0.354	0.192088	mm10-Clint1
6.19754e-06	-0.202057	0.042	0.139	0.192465	mm10-Naaa
6.29819e-06	0.224831	0.937	0.898	0.19559	mm10-Arpc3
6.3253e-06	0.221789	0.207	0.113	0.196432	mm10-Syap1
6.39521e-06	0.243858	0.199	0.084	0.198603	mm10-Supt6
6.41666e-06	-0.134117	0.021	0.097	0.199269	mm10-Rbl1
6.84635e-06	0.327474	0.581	0.449	0.212613	mm10-Spty2d1
6.94673e-06	-0.259813	0.277	0.444	0.215731	mm10-Ubr4
7.02609e-06	0.854329	0.254	0.173	0.218195	mm10-mt-Nd5
7.06225e-06	0.220754	0.191	0.073	0.219318	mm10-Magoh
7.61716e-06	-0.126772	0.024	0.105	0.236551	mm10-9530082P21Rik
7.99225e-06	0.27139	0.762	0.73	0.248199	mm10-Jak2
8.02795e-06	0.0914187	0.039	0	0.249308	HSV--HSV1
8.13532e-06	-0.323143	0.539	0.698	0.252642	mm10-Plbd1
8.62554e-06	-0.20566	0.835	0.924	0.267866	mm10-Trim12a
8.78035e-06	-0.304252	0.241	0.399	0.272674	mm10-Soat1
8.78917e-06	-0.256558	0.186	0.339	0.272948	mm10-Slc31a1
9.09016e-06	-0.577513	0.531	0.654	0.282295	mm10-Tnf
9.21029e-06	0.338426	0.401	0.281	0.286026	mm10-Prrc2c
9.32614e-06	0.210533	0.851	0.801	0.289623	mm10-Cox8a
9.54262e-06	0.422707	0.458	0.407	0.296346	mm10-Id1
9.5894e-06	-0.120637	0.801	0.919	0.297799	mm10-N4bp1
9.63722e-06	-0.233762	0.034	0.11	0.299284	mm10-Sfmbt2
9.82967e-06	0.221609	0.126	0.034	0.30526	mm10-Crebl2
9.83127e-06	0.308479	0.259	0.136	0.30531	mm10-Cd300lb
9.85217e-06	-0.111963	0.021	0.094	0.305959	mm10-Mmp19
1.02626e-05	0.276988	0.654	0.58	0.318706	mm10-App
1.03591e-05	0.219008	0.173	0.068	0.321701	mm10-Usp34
1.05421e-05	0.236538	0.262	0.126	0.327386	mm10-Fam110a
1.06651e-05	0.25915	0.38	0.226	0.331204	mm10-Cript
1.08487e-05	-0.290994	0.505	0.633	0.336906	mm10-BC005537
1.11383e-05	0.219849	0.995	0.995	0.345899	mm10-Neat1
1.11621e-05	0.278004	0.168	0.079	0.34664	mm10-N4bp2l1
1.12127e-05	-0.285298	0.356	0.488	0.34821	mm10-Pilrb1
1.12336e-05	0.258809	0.49	0.378	0.348859	mm10-Rps15a
1.1546e-05	0.28975	0.165	0.068	0.358562	mm10-Gfod1
1.17777e-05	0.281392	0.364	0.213	0.365755	mm10-Flna
1.24437e-05	0.276026	0.432	0.286	0.386439	mm10-Stk40
1.24704e-05	-0.10891	0.063	0.147	0.387267	mm10-Setdb2
1.25356e-05	0.440026	0.455	0.388	0.389294	mm10-Malt1
1.25449e-05	-0.204921	0.822	0.895	0.389581	mm10-Snap23
1.25537e-05	0.209576	0.832	0.808	0.389855	mm10-Rpl23
1.25931e-05	-0.216991	0.118	0.249	0.391078	mm10-Lpp
1.27184e-05	0.281695	0.479	0.346	0.394969	mm10-Gnai3
1.28306e-05	0.251339	0.102	0.026	0.398453	mm10-Snai1
1.30531e-05	-0.0515107	0.008	0.047	0.405364	mm10-Hbegf
1.3387e-05	-0.202778	0.05	0.15	0.415734	mm10-Ran
1.39966e-05	-0.204551	0.058	0.163	0.434665	mm10-Mob3c
1.41089e-05	0.245615	0.709	0.633	0.438152	mm10-Arf5
1.41126e-05	-0.435651	0.105	0.21	0.438266	mm10-Fnip2
1.42492e-05	0.301935	0.356	0.234	0.442509	mm10-Ccnt1
1.45809e-05	0.259684	0.628	0.501	0.452811	mm10-Rpl10
1.47203e-05	-0.237361	0.492	0.654	0.457139	mm10-Aff1
1.47217e-05	0.350066	0.33	0.197	0.457181	mm10-Zfp292
1.48273e-05	-0.252879	0.421	0.591	0.460462	mm10-H2-Q7
1.4909e-05	0.219449	0.147	0.05	0.462998	mm10-Anxa3
1.51988e-05	-0.261462	0.479	0.63	0.471998	mm10-Ifi35
1.5542e-05	-0.180618	0.016	0.087	0.482657	mm10-St6galnac6
1.61295e-05	-0.0748657	0	0.037	0.5009	mm10-Tbc1d9
1.6266e-05	0.269366	0.335	0.21	0.505139	mm10-Drap1
1.67616e-05	0.181148	0.037	0	0.520533	mm10-Csf3
1.67693e-05	0.70159	0.233	0.163	0.520771	mm10-Hilpda
1.67927e-05	0.255379	0.421	0.299	0.521497	mm10-Hnrnpa3
1.6851e-05	0.489791	0.529	0.449	0.523309	mm10-Lyz2
1.73524e-05	-0.252727	0.154	0.289	0.538879	mm10-Oas1g
1.74405e-05	-0.340888	0.094	0.21	0.541615	mm10-Mreg
1.7514e-05	-0.231819	0.12	0.249	0.543897	mm10-Smcr8
1.75311e-05	-0.330621	0.654	0.756	0.544429	mm10-Ppp1r2
1.79582e-05	-0.202836	0.094	0.215	0.557692	mm10-Srsf7
1.8011e-05	0.237253	0.942	0.874	0.55933	mm10-Prdx5
1.82378e-05	0.29472	0.298	0.165	0.566374	mm10-Gm26740
1.85559e-05	0.263998	0.228	0.115	0.576253	mm10-Ube2k
1.88044e-05	0.377257	0.615	0.541	0.583971	mm10-Rab11fip1
1.91147e-05	0.361201	0.33	0.205	0.593607	mm10-Klf7
1.98014e-05	0.277972	0.88	0.829	0.614931	mm10-Kpna4
2.00714e-05	-0.214089	0.086	0.202	0.623316	mm10-Prkce
2.05193e-05	-0.338528	0.118	0.231	0.637226	mm10-Plscr1
2.07885e-05	0.263062	0.236	0.144	0.645588	mm10-Arhgap26
2.0842e-05	-0.254392	0.398	0.564	0.647248	mm10-AB124611
2.14386e-05	0.229258	0.725	0.772	0.665775	mm10-Vps37b
2.14977e-05	-0.185171	0.01	0.073	0.66761	mm10-Gbp8
2.16301e-05	0.32428	0.615	0.535	0.671723	mm10-Nabp1
2.1792e-05	0.235235	0.173	0.084	0.676751	mm10-Kansl3
2.20802e-05	-0.202641	0.055	0.155	0.6857	mm10-Ahnak
2.2139e-05	-0.101346	0.005	0.06	0.687525	mm10-9130221H12Rik
2.23694e-05	-0.239458	0.306	0.467	0.694683	mm10-H2afz
2.27313e-05	-0.270896	0.23	0.383	0.705921	mm10-Csf2rb2
2.3141e-05	0.217482	0.599	0.606	0.718645	mm10-Tet2
2.34112e-05	-0.224071	0.212	0.362	0.727034	mm10-Prr5l
2.35758e-05	-0.18119	0.055	0.155	0.732145	mm10-Fbxw11
2.35763e-05	-0.141241	0.01	0.073	0.732161	mm10-Stx2
2.38451e-05	-0.258077	0.277	0.436	0.740509	mm10-Crebrf
2.41267e-05	0.236968	0.712	0.635	0.749254	mm10-Rps23
2.42093e-05	0.230833	0.683	0.585	0.751821	mm10-Rps3
2.42482e-05	0.29463	0.296	0.199	0.753029	mm10-Purb
2.48315e-05	-0.306261	0.131	0.249	0.771142	mm10-Rragc
2.5063e-05	0.242608	0.819	0.73	0.778331	mm10-Cap1
2.51833e-05	-0.361589	0.05	0.144	0.782068	mm10-Plau
2.52384e-05	-0.192355	0.05	0.147	0.783778	mm10-AW112010
2.55895e-05	0.177723	0.183	0.073	0.794681	mm10-Ssr4
2.61245e-05	-0.258327	0.06	0.163	0.811298	mm10-Rhou
2.65488e-05	0.278434	0.215	0.118	0.824474	mm10-4732465J04Rik
2.65618e-05	-0.0775969	0.005	0.052	0.824876	mm10-Zfp595
2.7603e-05	0.37972	0.296	0.171	0.857211	mm10-Dusp6
2.76436e-05	0.283662	0.545	0.446	0.858473	mm10-Rpl13
2.7715e-05	0.242322	0.319	0.178	0.86069	mm10-Taok1
2.82447e-05	0.26518	0.492	0.412	0.877139	mm10-Rps11
2.84581e-05	0.169286	0.296	0.165	0.883766	mm10-Bbip1
2.90573e-05	-0.30095	0.191	0.325	0.902375	mm10-Herc1
3.00929e-05	-0.169627	0.039	0.129	0.934536	mm10-Plod3
3.06e-05	0.340923	0.678	0.549	0.950283	mm10-Ankrd33b
3.13967e-05	-0.222312	0.393	0.556	0.975024	mm10-Atf4
3.23725e-05	0.254016	0.476	0.367	1	mm10-Gpbp1
3.25612e-05	-0.283727	0.12	0.218	1	mm10-Ythdf1
3.27234e-05	0.265747	0.563	0.433	1	mm10-Rpl18
3.27839e-05	-0.229728	0.196	0.341	1	mm10-Ubtd1
3.30348e-05	0.320034	0.408	0.257	1	mm10-Cks2
3.37808e-05	-0.0576747	0	0.034	1	mm10-Tppp3
3.38853e-05	0.383266	0.555	0.428	1	mm10-Hp
3.41936e-05	-0.351012	0.476	0.593	1	mm10-Zfand5
3.49545e-05	-0.258129	0.605	0.74	1	mm10-Fas
3.50093e-05	0.0765747	0.034	0	1	mm10-Krr1
3.508e-05	0.452227	0.846	0.822	1	mm10-Plaur
3.53244e-05	0.287443	0.264	0.147	1	mm10-A530064D06Rik
3.58803e-05	0.253281	0.23	0.11	1	mm10-Amer2
3.60391e-05	0.271006	0.709	0.606	1	mm10-Itgal
3.8466e-05	0.24471	0.573	0.462	1	mm10-Rplp0
3.84968e-05	1.14407	0.788	0.887	1	mm10-mt-Co1
3.89147e-05	0.427991	0.77	0.703	1	mm10-Ifrd1
3.9282e-05	0.265667	0.356	0.215	1	mm10-Rab32
3.9373e-05	-0.191087	0.034	0.115	1	mm10-Tpst1
3.97312e-05	-0.195536	0.034	0.118	1	mm10-Trp53inp1
3.97323e-05	-0.15966	0.05	0.144	1	mm10-Mlkl
4.09219e-05	0.174403	0.131	0.042	1	mm10-Zfp597
4.18029e-05	0.243262	0.615	0.496	1	mm10-Rpl19
4.19708e-05	-0.26933	0.123	0.239	1	mm10-Tob1
4.23729e-05	-0.256518	0.209	0.344	1	mm10-Cox7b
4.34985e-05	-0.228097	0.181	0.318	1	mm10-Ctsa
4.3586e-05	-0.120359	0.018	0.084	1	mm10-Piezo1
4.4037e-05	-0.264573	0.359	0.507	1	mm10-Znrf1
4.40375e-05	0.180366	0.144	0.05	1	mm10-Pla1a
4.78097e-05	-0.106615	0.01	0.071	1	mm10-Dab2
4.86031e-05	-0.194181	0.594	0.745	1	mm10-Gla
4.98723e-05	-0.145683	0.029	0.108	1	mm10-Gm19684
5.00269e-05	0.125155	0.207	0.102	1	mm10-Hpcal1
5.01505e-05	0.313804	0.304	0.202	1	mm10-Rnf19a
5.09596e-05	0.272022	0.521	0.407	1	mm10-Sept7
5.22714e-05	-0.264496	0.254	0.344	1	mm10-Gm5150
5.24423e-05	-0.162451	0.141	0.268	1	mm10-Man2a1
5.34666e-05	-0.198135	0.099	0.215	1	mm10-Csprs
5.39583e-05	-0.182778	0.217	0.36	1	mm10-Stard3
5.56377e-05	0.253741	0.162	0.063	1	mm10-Nt5e
5.58335e-05	0.223907	0.741	0.635	1	mm10-Pde4b
5.70341e-05	0.22	0.652	0.609	1	mm10-Itgam
5.70443e-05	-0.360584	0.599	0.659	1	mm10-Sema4d
5.70501e-05	-0.206349	0.068	0.163	1	mm10-Map4
5.79028e-05	-0.239469	0.152	0.273	1	mm10-9330175E14Rik
5.79325e-05	0.136191	0.084	0.021	1	mm10-Faap100
5.83632e-05	-0.322918	0.264	0.415	1	mm10-Cited2
5.90369e-05	0.41562	0.277	0.16	1	mm10-Ero1l
5.96386e-05	0.232364	0.715	0.598	1	mm10-Rpl38
5.97383e-05	0.440559	0.39	0.302	1	mm10-Zfp36l1
5.97576e-05	-0.192057	0.089	0.199	1	mm10-Rnf139
6.03112e-05	-0.251121	0.474	0.606	1	mm10-Etv6
6.07083e-05	-0.216063	0.526	0.677	1	mm10-Azi2
6.08706e-05	0.319255	0.995	0.997	1	mm10-Il1b
6.15947e-05	0.242844	0.901	0.871	1	mm10-Iqgap1
6.28612e-05	0.289029	0.754	0.672	1	mm10-Cyp4f18
6.72583e-05	0.269628	0.479	0.352	1	mm10-Pfkp
6.74661e-05	-0.221073	0.822	0.906	1	mm10-Tgoln1
6.84099e-05	0.191712	0.173	0.073	1	mm10-Timm17b
6.94291e-05	0.189237	0.139	0.05	1	mm10-Ufsp2
6.97233e-05	-0.0932326	0.005	0.055	1	mm10-4933412O06Rik
7.07926e-05	-0.0656547	0	0.031	1	mm10-Timp1
7.07926e-05	-0.0584152	0	0.031	1	mm10-Pim2
7.26437e-05	-0.200501	0.175	0.31	1	mm10-Sgk3
7.26519e-05	-0.209813	0.552	0.698	1	mm10-Rab5c
7.4297e-05	0.267608	0.186	0.084	1	mm10-Gde1
7.5835e-05	-0.0925774	0.029	0.094	1	mm10-AI413582
7.58771e-05	-0.0893665	0.016	0.073	1	mm10-Casp2
7.73133e-05	-0.0827877	0.003	0.047	1	mm10-Dusp3
7.74614e-05	0.307152	0.458	0.354	1	mm10-Gsn
7.84098e-05	-0.425267	0.126	0.247	1	mm10-Inhba
7.84275e-05	-0.259554	0.154	0.273	1	mm10-Pank2
7.84497e-05	0.260771	0.377	0.241	1	mm10-Pten
7.91259e-05	-0.354653	0.029	0.102	1	mm10-Cldn1
8.28478e-05	-0.0773515	0.003	0.047	1	mm10-Plekho1
8.31489e-05	0.242658	0.215	0.115	1	mm10-Dctn4
8.53081e-05	0.209822	0.861	0.837	1	mm10-Picalm
8.77669e-05	0.347943	0.335	0.236	1	mm10-Pfkfb3
8.87907e-05	0.255036	0.254	0.139	1	mm10-Rab6a
8.99166e-05	0.240049	0.246	0.126	1	mm10-Dstn
9.01539e-05	0.23979	0.5	0.362	1	mm10-Rpl11
9.18938e-05	-0.210088	0.762	0.871	1	mm10-Fcgr3
9.19077e-05	0.293705	0.785	0.675	1	mm10-Sgms2
9.24925e-05	-0.155212	0.49	0.643	1	mm10-Atp1b3
9.32823e-05	0.228336	0.568	0.546	1	mm10-Nup98
9.65127e-05	-0.20593	0.05	0.139	1	mm10-Abl2
9.70667e-05	-0.155856	0.016	0.079	1	mm10-Ncoa7
9.72223e-05	0.224957	0.846	0.759	1	mm10-Plk3
9.76659e-05	0.28801	0.424	0.336	1	mm10-Klf3
0.000100184	0.222385	0.696	0.612	1	mm10-Clic1
0.000102208	0.270727	0.395	0.26	1	mm10-Ago2
0.000102625	-0.348948	0.487	0.64	1	mm10-Lgals3
0.000104944	-0.278823	0.16	0.273	1	mm10-Mbnl1
0.000105154	0.217181	0.259	0.163	1	mm10-Rps18
0.000105567	-0.222881	0.144	0.268	1	mm10-Rbm38
0.000111515	-0.157905	0.099	0.205	1	mm10-2610507B11Rik
0.000111876	0.258761	0.364	0.273	1	mm10-Zswim4
0.000112405	-0.252301	0.602	0.743	1	mm10-Jun
0.000112719	-0.207702	0.157	0.283	1	mm10-Tapbpl
0.000114813	-0.258077	0.264	0.396	1	mm10-Chmp5
0.000115118	0.193675	0.152	0.06	1	mm10-Man1b1
0.000117845	-0.24745	0.264	0.409	1	mm10-Metrnl
0.000119395	-0.0988158	0.016	0.076	1	mm10-Rars
0.000121196	-0.170403	0.031	0.108	1	mm10-P2ry12
0.000121197	0.201587	0.149	0.063	1	mm10-Shoc2
0.000121498	0.259205	0.301	0.181	1	mm10-Dennd5a
0.000125724	0.182724	0.181	0.079	1	mm10-Ell
0.000126884	0.288539	0.717	0.648	1	mm10-Rel
0.000131518	0.250177	0.492	0.37	1	mm10-Rpl24
0.000131894	-0.151204	0.045	0.129	1	mm10-Wdr83os
0.000133626	-0.221233	0.115	0.228	1	mm10-Dcun1d1
0.000133779	-0.108436	0.013	0.071	1	mm10-Rab29
0.000134781	0.284962	0.576	0.467	1	mm10-Sbno2
0.000135331	-0.312111	0.327	0.459	1	mm10-Ccnd2
0.000140074	0.129911	0.076	0.016	1	mm10-Atg9a
0.000140512	-0.164425	0.772	0.882	1	mm10-Nsd3
0.00014289	0.28387	0.56	0.449	1	mm10-Rab44
0.000146155	-0.391402	0.139	0.247	1	mm10-Clec12a
0.000146889	-0.166173	0.058	0.144	1	mm10-Gm10076
0.000148498	-0.052724	0	0.029	1	mm10-Plxnd1
0.000148498	-0.056404	0	0.029	1	mm10-Kdr
0.000148566	0.28955	0.285	0.173	1	mm10-Slc25a37
0.000151343	-0.131629	0.016	0.076	1	mm10-Art3
0.000152506	0.249315	0.272	0.152	1	mm10-Myo1c
0.000156366	0.174294	0.832	0.766	1	mm10-Cd300ld
0.000157093	-0.146154	0.026	0.094	1	mm10-Tmem192
0.00015824	-0.126393	0.024	0.092	1	mm10-Tmem106a
0.000161798	0.198503	0.647	0.541	1	mm10-Grb2
0.000162461	0.242558	0.154	0.092	1	mm10-Higd1a
0.000164466	-0.236362	0.243	0.383	1	mm10-Atp6v0a1
0.000164796	-0.116171	0.149	0.252	1	mm10-Gm36161
0.00016579	0.195781	0.851	0.814	1	mm10-Gmfg
0.000168586	0.187481	0.131	0.055	1	mm10-Lrrc58
0.000170546	0.263726	0.17	0.076	1	mm10-Agpat4
0.000171082	0.281091	0.254	0.197	1	mm10-Esd
0.000172173	-0.208911	0.23	0.367	1	mm10-Nono
0.000177824	0.25025	0.432	0.302	1	mm10-Fam32a
0.00017872	-0.16353	0.068	0.163	1	mm10-Rpe
0.000180667	-0.171914	0.018	0.081	1	mm10-Rab15
0.000182293	-0.0559852	0.01	0.052	1	mm10-Hfe
0.000183586	0.204864	0.17	0.073	1	mm10-Ddit4
0.000183654	0.206209	0.217	0.11	1	mm10-Tkt
0.000184392	0.291136	0.932	0.934	1	mm10-Ccnl1
0.000188469	0.226078	0.401	0.307	1	mm10-Eef2
0.000188577	-0.1691	0.063	0.155	1	mm10-Arl8a
0.000188705	-0.165184	0.073	0.168	1	mm10-Ep400
0.000192911	-0.124422	0.021	0.081	1	mm10-Gas2l3
0.000196246	-0.160405	0.039	0.115	1	mm10-Erap1
0.000196256	-0.187822	0.084	0.184	1	mm10-Svbp
0.000199408	0.25965	0.285	0.215	1	mm10-Ddx24
0.000199467	-0.230778	0.665	0.756	1	mm10-Furin
0.000200137	0.158141	0.084	0.024	1	mm10-Stard7
0.000203591	0.140217	0.196	0.097	1	mm10-Taf6l
0.000204636	-0.226353	0.369	0.512	1	mm10-Arhgap30
0.000204974	-0.0531773	0.034	0.081	1	mm10-Adss
0.000206005	-0.117529	0.01	0.063	1	mm10-E430024P14Rik
0.00021361	-0.239119	0.424	0.559	1	mm10-Irf5
0.000214207	-0.141234	0.034	0.108	1	mm10-Comt
0.000214667	-0.149689	0.039	0.113	1	mm10-Cndp2
0.000221017	-0.27125	0.736	0.806	1	mm10-Tmed5
0.000224848	-0.215383	0.084	0.181	1	mm10-Atp8a1
0.000225757	-0.235047	0.081	0.178	1	mm10-G3bp2
0.000226196	-0.175244	0.055	0.142	1	mm10-Cxcl16
0.000227172	0.270339	0.377	0.268	1	mm10-St3gal6
0.000229067	0.21545	0.665	0.525	1	mm10-Fem1c
0.000232129	-0.230531	0.039	0.11	1	mm10-Glul
0.000236644	-0.10941	0.123	0.066	1	mm10-Gm26870
0.00023782	0.180732	0.099	0.029	1	mm10-Yeats4
0.000238515	-0.214725	0.17	0.294	1	mm10-Rhox8
0.000240391	0.147582	0.929	0.916	1	mm10-Arpc2
0.000242268	-0.133437	0.029	0.097	1	mm10-Ms4a6c
0.000244548	0.212348	0.78	0.688	1	mm10-Rps14
0.000244986	-0.147006	0.723	0.843	1	mm10-Gna13
0.000245047	-0.188453	0.346	0.491	1	mm10-Rtn4
0.000247945	0.30989	0.461	0.336	1	mm10-Pgk1
0.000250441	0.21051	0.717	0.604	1	mm10-Rpl30
0.000252658	-0.0932528	0.079	0.157	1	mm10-Coq2
0.000253961	-0.0801537	0.016	0.068	1	mm10-Fam129b
0.000256703	-0.134075	0.016	0.073	1	mm10-Taf4b
0.000258524	0.203423	0.733	0.654	1	mm10-Atp5l
0.000264724	0.189422	0.22	0.118	1	mm10-Rpl13a
0.000271791	-0.397451	0.23	0.333	1	mm10-Slc20a1
0.000272599	-0.175648	0.076	0.171	1	mm10-Abhd2
0.000288052	0.201158	0.66	0.612	1	mm10-Morf4l1
0.000288449	0.187795	0.152	0.066	1	mm10-Isca1
0.00028967	-0.354388	0.364	0.493	1	mm10-Crem
0.000298317	-0.189336	0.209	0.339	1	mm10-Hmox2
0.000301459	-0.142409	0.031	0.102	1	mm10-Ctsc
0.000309368	0.229943	0.691	0.572	1	mm10-Ier2
0.000311924	-0.0549058	0	0.026	1	mm10-Trim69
0.000311924	-0.0475691	0	0.026	1	mm10-Mbd1
0.000311924	-0.047803	0	0.026	1	mm10-Sh3pxd2b
0.000311924	-0.0463927	0	0.026	1	mm10-Plxnb2
0.000315545	-0.155769	0.045	0.118	1	mm10-Sav1
0.000315885	0.186575	0.178	0.081	1	mm10-Ccnd3
0.000316665	0.184659	0.154	0.068	1	mm10-Nt5c2
0.00031851	0.239117	0.908	0.869	1	mm10-Lamp2
0.000320019	-0.226642	0.581	0.711	1	mm10-Upp1
0.000320651	0.0726249	0.026	0	1	mm10-Ago3
0.000323334	-0.139144	0.092	0.184	1	mm10-Adnp2
0.000326828	-0.0848534	0.008	0.055	1	mm10-Naglu
0.000327233	-0.231626	0.704	0.782	1	mm10-Il18rap
0.000327565	0.240111	0.366	0.244	1	mm10-Rpl32
0.000331878	0.198675	0.183	0.087	1	mm10-Mrpl52
0.000333458	0.227543	0.38	0.252	1	mm10-Kdm2a
0.000333882	1.09826	0.772	0.824	1	mm10-mt-Co2
0.000338312	0.192342	0.17	0.076	1	mm10-Zc3h15
0.000345849	0.223535	0.304	0.231	1	mm10-Rpl35
0.000346702	0.124057	0.78	0.798	1	mm10-Rplp2
0.000348959	0.226162	0.207	0.108	1	mm10-Dnajc5
0.000357182	-0.150949	0.06	0.144	1	mm10-Slc45a4
0.000362555	0.0951791	0.115	0.045	1	mm10-Rrp1
0.000370604	-0.129899	0.034	0.105	1	mm10-Pip4k2c
0.000373855	-0.0700283	0.016	0.066	1	mm10-Llgl1
0.000376638	0.282139	0.712	0.622	1	mm10-Kctd12
0.000378724	-0.268605	0.144	0.252	1	mm10-Osbpl8
0.000384207	-0.159413	0.107	0.207	1	mm10-Fap
0.000384368	0.211737	0.267	0.152	1	mm10-Lilra6
0.000387554	0.223755	0.736	0.643	1	mm10-Anxa2
0.00038829	0.12752	0.05	0.008	1	mm10-Dmxl1
0.0003919	-0.281537	0.39	0.496	1	mm10-Sgpl1
0.000393314	0.210323	0.178	0.089	1	mm10-Asap1
0.000395492	-0.0600359	0.942	0.99	1	mm10-Slfn2
0.00039569	0.208588	0.654	0.609	1	mm10-Rps24
0.000400763	-0.135759	0.162	0.273	1	mm10-Pnpla7
0.000405016	0.247178	0.186	0.089	1	mm10-Atg16l1
0.000405094	0.193881	0.806	0.709	1	mm10-Etf1
0.000412499	-0.334648	0.058	0.142	1	mm10-F10
0.000417659	0.179684	0.144	0.073	1	mm10-Phf1
0.00041777	-0.150865	0.086	0.181	1	mm10-Csk
0.000420639	-0.166394	0.034	0.105	1	mm10-Lhfpl2
0.000427684	-0.208033	0.251	0.381	1	mm10-Otud5
0.00042784	0.239505	0.45	0.341	1	mm10-Ssu72
0.000431621	-0.12259	0.024	0.087	1	mm10-Phf11c
0.000432127	0.113922	0.073	0.018	1	mm10-Gm16867
0.000436391	0.100564	0.403	0.441	1	mm10-Nfkb2
0.000438041	0.18535	0.107	0.045	1	mm10-Abcc1
0.000440677	-0.196397	0.021	0.081	1	mm10-Il27
0.000444177	-0.14212	0.024	0.087	1	mm10-Phf11b
0.000446311	-0.0879039	0.005	0.047	1	mm10-Mtfr2
0.000450279	0.167537	0.097	0.031	1	mm10-Usp47
0.000450439	0.201144	0.136	0.066	1	mm10-Il16
0.000451638	0.199772	0.283	0.165	1	mm10-Rps4x
0.000456288	-0.11035	0.021	0.081	1	mm10-Gpr146
0.000460274	0.254512	0.264	0.152	1	mm10-Nsrp1
0.000460497	-0.195878	0.17	0.289	1	mm10-Dgkd
0.000468299	0.239003	0.272	0.16	1	mm10-Lysmd3
0.000468447	0.199129	0.484	0.472	1	mm10-Clec5a
0.000487433	0.180164	0.157	0.073	1	mm10-Nrbf2
0.000488418	0.216946	0.343	0.228	1	mm10-Mob4
0.000491205	0.0907277	0.291	0.315	1	mm10-Srrm1
0.000491534	0.183365	0.518	0.472	1	mm10-Rpl28
0.000496777	0.209837	0.188	0.092	1	mm10-Egr3
0.000502559	-0.219297	0.497	0.627	1	mm10-Mafk
0.000506963	0.189752	0.236	0.129	1	mm10-Srsf11
0.000507154	-0.101833	0.034	0.097	1	mm10-Fam214b
0.000513661	0.203094	0.495	0.436	1	mm10-Rpl27
0.000515333	0.146014	0.052	0.01	1	mm10-Reps2
0.000518268	0.331633	0.293	0.21	1	mm10-Rhov
0.000527434	0.197816	0.154	0.079	1	mm10-Trip11
0.000528131	-0.124184	0.141	0.244	1	mm10-Crybg1
0.000536952	-0.150723	0.047	0.123	1	mm10-9130230L23Rik
0.000542112	0.125605	0.065	0.013	1	mm10-Trub2
0.00055304	-0.181184	0.073	0.163	1	mm10-Aprt
0.000556309	-0.190114	0.071	0.157	1	mm10-Insig1
0.000559658	-0.07994	0.008	0.045	1	mm10-Tial1
0.000560834	-0.147341	0.17	0.283	1	mm10-Wwp2
0.000561749	0.0839985	0.052	0.01	1	mm10-Il1rl1
0.000567517	-0.178473	0.047	0.121	1	mm10-Casp7
0.000573268	0.251067	0.631	0.567	1	mm10-Vps4b
0.000576788	-0.0807548	0.003	0.039	1	mm10-Slc30a1
0.000578641	-0.0788366	0.024	0.076	1	mm10-Prpf18
0.000584675	0.219189	0.105	0.039	1	mm10-E330009J07Rik
0.000591679	-0.222259	0.618	0.717	1	mm10-Ist1
0.000597413	0.261846	0.359	0.249	1	mm10-Arl5b
0.000601033	-0.157559	0.249	0.373	1	mm10-Rnf167
0.000601379	0.226019	0.296	0.194	1	mm10-Timp2
0.000611159	-0.0757655	0.008	0.05	1	mm10-Gm15056
0.000612267	0.0807519	0.045	0.005	1	mm10-Gm28192
0.000613598	0.211978	0.346	0.244	1	mm10-Ndufa2
0.000613962	0.190815	0.33	0.213	1	mm10-Plp2
0.00061782	0.238224	0.377	0.268	1	mm10-Rpl6
0.00062246	-0.186346	0.013	0.058	1	mm10-Clic5
0.000631582	0.231467	0.508	0.396	1	mm10-Rpl26
0.000637753	-0.223568	0.387	0.522	1	mm10-Pcf11
0.000639672	-0.0188945	0.359	0.478	1	mm10-Rhob
0.000640547	0.207349	0.183	0.094	1	mm10-Txnl1
0.000644668	-0.163408	0.092	0.184	1	mm10-Zeb1
0.000645676	0.108806	0.05	0.008	1	mm10-Cdc25b
0.000656461	-0.0398953	0	0.024	1	mm10-Trappc6a
0.000656461	-0.0431193	0	0.024	1	mm10-Slc7a2
0.000656461	-0.0356525	0	0.024	1	mm10-Spon1
0.000656461	-0.0473391	0	0.024	1	mm10-Rgs10
0.000656461	-0.0478975	0	0.024	1	mm10-Abcd4
0.000663728	0.248875	0.259	0.16	1	mm10-Ahi1
0.000671244	-0.169306	0.733	0.822	1	mm10-Hnrnph2
0.000672025	-0.199669	0.12	0.223	1	mm10-Papd7
0.000673007	0.05722	0.024	0	1	mm10-Uchl4
0.000673007	0.0517811	0.024	0	1	mm10-Sorbs1
0.000673007	0.118645	0.024	0	1	mm10-Krt83
0.000681364	0.210779	0.474	0.36	1	mm10-Pitpna
0.000682102	-0.171058	0.118	0.22	1	mm10-Sap30
0.000683209	0.229056	0.285	0.215	1	mm10-Gm14286
0.000692812	0.218357	0.366	0.262	1	mm10-Mthfs
0.000702774	-0.104387	0.254	0.365	1	mm10-Vps26a
0.000705269	0.202802	0.44	0.31	1	mm10-Sin3b
0.000716921	-0.18661	0.233	0.357	1	mm10-Ankrd17
0.000722563	-0.25156	0.495	0.63	1	mm10-Icam1
0.000728865	0.0883803	0.042	0.008	1	mm10-Krt4
0.000731932	0.185964	0.118	0.047	1	mm10-Sh3bp5
0.00073656	0.197838	0.228	0.129	1	mm10-Fam104a
0.000745278	0.290608	0.421	0.344	1	mm10-Trps1
0.000747278	-0.142968	0.78	0.882	1	mm10-Trim12c
0.000752309	0.106952	0.372	0.462	1	mm10-Hk2
0.000752707	0.126552	0.081	0.039	1	mm10-Tmem120a
0.000753011	0.144604	0.097	0.031	1	mm10-Arhgap24
0.0007594	-0.120438	0.233	0.344	1	mm10-Tra2b
0.000766278	0.288234	0.458	0.341	1	mm10-Itpkb
0.000775494	-0.0884985	0.01	0.058	1	mm10-Esr1
0.000785412	-0.143656	0.021	0.079	1	mm10-Adora3
0.000803486	0.153541	0.772	0.774	1	mm10-Sh3bgrl3
0.00080627	-0.083349	0.042	0.102	1	mm10-Syvn1
0.000815492	-0.203752	0.154	0.265	1	mm10-Tle4
0.000817478	0.210768	0.188	0.115	1	mm10-Ccdc174
0.000824183	0.208761	0.678	0.551	1	mm10-Mmp9
0.000826789	0.162289	0.131	0.055	1	mm10-Map3k14
0.000836752	0.264677	0.39	0.273	1	mm10-Celf2
0.000858253	0.0881516	0.058	0.01	1	mm10-Atp5g1
0.000864274	0.165737	0.134	0.055	1	mm10-Nsa2
0.000867332	0.09205	0.058	0.01	1	mm10-A630001O12Rik
0.000868824	0.223708	0.437	0.312	1	mm10-Aff4
0.000872692	0.149228	0.073	0.018	1	mm10-Ccdc189
0.000873053	0.21439	0.442	0.318	1	mm10-Pdlim7
0.000875517	0.19564	0.134	0.06	1	mm10-C130050O18Rik
0.000879614	0.254801	0.56	0.459	1	mm10-Slc2a1
0.000883484	0.191791	0.094	0.047	1	mm10-Jmy
0.000885352	-0.0917095	0.018	0.071	1	mm10-Ube2d1
0.00089341	0.214246	0.319	0.215	1	mm10-Tcf25
0.000901692	-0.0813168	0.01	0.055	1	mm10-Zfp456
0.000913205	-0.133967	0.024	0.076	1	mm10-Zbtb5
0.000920905	0.19883	0.22	0.126	1	mm10-Gm14548
0.000921479	-0.148087	0.128	0.228	1	mm10-Traf6
0.000921661	0.399674	0.236	0.171	1	mm10-Gm12840
0.000936022	1.3138	0.812	0.829	1	mm10-mt-Co3
0.000950772	0.172941	0.846	0.822	1	mm10-Ddx6
0.000952877	0.199598	0.461	0.349	1	mm10-Crebbp
0.000958031	0.197796	0.374	0.255	1	mm10-Rps19
0.000971705	0.177399	0.215	0.115	1	mm10-Dot1l
0.000975605	0.177242	0.152	0.079	1	mm10-Pold4
0.000981377	-0.154585	0.094	0.186	1	mm10-Lgals3bp
0.000995131	-0.194905	0.338	0.465	1	mm10-Trim26
0.00100174	0.218017	0.398	0.315	1	mm10-Rpl36
0.00101016	0.10896	0.992	1	1	mm10-Lilr4b
0.00101703	0.209424	0.262	0.155	1	mm10-Elk4
0.00102025	0.137307	0.102	0.042	1	mm10-Mpdu1
0.00102228	-0.213202	0.55	0.646	1	mm10-Arrdc4
0.00102665	-0.0742875	0.008	0.05	1	mm10-Flrt3
0.00103258	-0.142187	0.034	0.1	1	mm10-Pla2g16
0.00104506	0.212799	0.495	0.381	1	mm10-Cd300c2
0.00105622	-0.0597547	0.099	0.176	1	mm10-Sgk1
0.00106015	0.126774	0.058	0.018	1	mm10-Adam19
0.00108174	-0.205525	0.123	0.213	1	mm10-Hlx
0.00108674	-0.0677989	0.003	0.037	1	mm10-Mmp14
0.00109403	-0.109947	0.086	0.165	1	mm10-Zeb2os
0.00110943	-0.210921	0.168	0.278	1	mm10-Hexa
0.00111632	0.0786904	0.037	0.003	1	mm10-1200007C13Rik
0.00111834	0.182822	0.16	0.084	1	mm10-Grk5
0.00114517	0.163102	0.199	0.105	1	mm10-Bcap31
0.00115984	-0.193723	0.073	0.157	1	mm10-Tnfrsf12a
0.00116103	0.213544	0.312	0.239	1	mm10-Leprotl1
0.00116596	0.227141	0.288	0.184	1	mm10-Cyfip1
0.00116654	-0.16555	0.058	0.129	1	mm10-Tnfaip8l2
0.0011716	0.238198	0.529	0.459	1	mm10-Top1
0.00118229	-0.0810011	0.008	0.05	1	mm10-Dhrs3
0.00118366	0.182534	0.33	0.215	1	mm10-Sar1a
0.00118778	-0.176497	0.173	0.283	1	mm10-Arf3
0.00121123	0.195237	0.521	0.488	1	mm10-Srrm2
0.00121241	0.192822	0.157	0.079	1	mm10-Nudt18
0.0012176	0.223969	0.264	0.16	1	mm10-Tinf2
0.00122769	-0.16643	0.089	0.178	1	mm10-Tgif2
0.00125199	-0.209457	0.165	0.27	1	mm10-Pnrc2
0.00125312	0.178898	0.228	0.134	1	mm10-Eif4h
0.00127044	-0.219643	0.123	0.22	1	mm10-Mfsd1
0.00127209	0.078084	0.089	0.034	1	mm10-Otub1
0.00130247	-0.116321	0.029	0.087	1	mm10-B230217C12Rik
0.00130835	-0.11831	0.042	0.11	1	mm10-Pla2g15
0.00133036	-0.178753	0.209	0.325	1	mm10-Pmaip1
0.00133137	0.220002	0.296	0.184	1	mm10-F5
0.00133984	-0.144882	0.147	0.247	1	mm10-Eif6
0.0013426	0.211124	0.474	0.388	1	mm10-Tln1
0.00135018	-0.19027	0.209	0.325	1	mm10-Scarb2
0.00137424	0.101957	0.052	0.01	1	mm10-Slc39a4
0.00138239	0.226353	0.241	0.168	1	mm10-Rap1a
0.0013852	-0.0406721	0	0.021	1	mm10-Duoxa2
0.0013852	-0.0344555	0	0.021	1	mm10-Gm12764
0.0013852	-0.0433982	0	0.021	1	mm10-Dhfr
0.0013852	-0.0491157	0	0.021	1	mm10-Il2ra
0.0013852	-0.0344486	0	0.021	1	mm10-Cnp
0.0013852	-0.0403181	0	0.021	1	mm10-Ptpro
0.0013852	-0.0526541	0	0.021	1	mm10-Gpnmb
0.0013852	-0.0380736	0	0.021	1	mm10-Pgf
0.0013852	-0.0535325	0	0.021	1	mm10-Dusp18
0.00140665	0.228776	0.764	0.717	1	mm10-Calm1
0.00140776	-0.120334	0.026	0.084	1	mm10-Gm11696
0.00140896	-0.111943	0.107	0.192	1	mm10-Tmem55b
0.00141174	-0.0785948	0.024	0.073	1	mm10-Pkig
0.0014185	-0.141258	0.065	0.144	1	mm10-Ociad1
0.00142641	-0.110449	0.06	0.131	1	mm10-Ssfa2
0.00144049	-0.211345	0.304	0.425	1	mm10-Ing3
0.0014502	-0.190374	0.11	0.202	1	mm10-Nfatc1
0.00146758	-0.148188	0.073	0.155	1	mm10-A530040E14Rik
0.00146968	-0.17099	0.12	0.218	1	mm10-Xrn2
0.0014784	0.203836	0.327	0.234	1	mm10-Cnbp
0.00150671	0.147278	0.071	0.029	1	mm10-Crispld2
0.00151232	-0.212712	0.212	0.323	1	mm10-Calr
0.00152043	-0.156191	0.086	0.173	1	mm10-Plekhm1
0.00152071	0.230517	0.223	0.142	1	mm10-Kdm3a
0.00152654	0.0881558	0.06	0.013	1	mm10-Smpd5
0.00153281	-0.120612	0.982	0.997	1	mm10-Rab7
0.00155337	-0.150335	0.065	0.144	1	mm10-Hat1
0.00155566	0.200583	0.518	0.423	1	mm10-Map2k4
0.00159004	-0.0789282	0.005	0.042	1	mm10-Zc3h12d
0.00160153	-0.121458	0.039	0.105	1	mm10-Parp11
0.00160188	0.178022	0.107	0.047	1	mm10-Rcbtb2
0.00160308	-0.0820509	0.644	0.761	1	mm10-Ascc3
0.00160571	-0.253787	0.471	0.577	1	mm10-Atp11b
0.00160964	-0.0518294	0.021	0.058	1	mm10-Lsmem1
0.00161053	-0.111415	0.026	0.076	1	mm10-Emp1
0.00161977	-0.179693	0.157	0.26	1	mm10-Evi2
0.0016243	0.0712435	0.327	0.367	1	mm10-Med13
0.00165016	0.24306	0.665	0.57	1	mm10-H2-Q10
0.00166667	-0.140907	0.045	0.113	1	mm10-Fzd5
0.0016765	-0.175058	0.27	0.391	1	mm10-Elmo1
0.00167791	-0.0750829	0.005	0.042	1	mm10-Egln2
0.00168511	-0.186873	0.102	0.189	1	mm10-Itgb7
0.0016995	-0.0842057	0.029	0.081	1	mm10-Rprd2
0.00170048	0.0821493	0.042	0.005	1	mm10-Zfp617
0.00171523	0.245429	0.259	0.234	1	mm10-Abca1
0.00171552	0.164012	0.178	0.092	1	mm10-Tmem127
0.00173897	-0.0670419	0.005	0.042	1	mm10-Pnp2
0.00175557	0.140422	0.107	0.058	1	mm10-P2ry2
0.0017577	-0.175006	0.162	0.268	1	mm10-Mapre2
0.00176365	-0.0554934	0.27	0.362	1	mm10-Hmgb1
0.00176398	-0.134363	0.058	0.131	1	mm10-Dpf2
0.00176938	0.231078	0.34	0.239	1	mm10-Rasip1
0.00178038	-0.0818438	0.008	0.047	1	mm10-Scpep1
0.00178345	0.205466	0.296	0.207	1	mm10-Yme1l1
0.00178378	0.191087	0.599	0.528	1	mm10-Pafah1b1
0.00184136	-0.16014	0.024	0.079	1	mm10-Cd83
0.00187622	0.250235	0.233	0.142	1	mm10-Sik1
0.00187834	0.220835	0.401	0.294	1	mm10-Pomp
0.00188743	0.160502	0.99	0.997	1	mm10-Tyrobp
0.00191359	0.164584	0.118	0.055	1	mm10-Scaf11
0.00191767	-0.168725	0.257	0.375	1	mm10-Acap2
0.00195741	-0.231111	0.647	0.759	1	mm10-Nfkbid
0.00196163	0.0876967	0.008	0.013	1	mm10-Saa3
0.00196619	-0.0879354	0.01	0.052	1	mm10-Cd72
0.00198592	0.263443	0.387	0.291	1	mm10-Baz1a
0.00199764	-0.0738896	0.008	0.045	1	mm10-S100a4
0.00200915	-0.119012	0.058	0.129	1	mm10-Sgms1
0.0020139	-0.164239	0.089	0.173	1	mm10-Stat5b
0.00204138	-0.0505336	0.22	0.325	1	mm10-Hmox1
0.00206344	-0.0766627	0.005	0.037	1	mm10-Pkib
0.00206508	0.183722	0.259	0.16	1	mm10-Gramd1a
0.00207731	0.143593	0.152	0.073	1	mm10-Huwe1
0.002099	-0.116625	0.081	0.16	1	mm10-Tfeb
0.00210848	0.120514	0.055	0.013	1	mm10-Rrm2b
0.0021098	-0.191556	0.128	0.218	1	mm10-Hist1h2be
0.00211617	0.0865067	0.047	0.008	1	mm10-Slc35a4
0.00212471	-0.0561143	0.003	0.034	1	mm10-Chil3
0.00212854	-0.0649977	0.003	0.031	1	mm10-Anpep
0.00213435	-0.0769394	0.008	0.047	1	mm10-Tfec
0.0021623	0.0642543	0.034	0.003	1	mm10-Sec22c
0.00217584	0.105721	0.073	0.021	1	mm10-Exosc3
0.00219691	0.0820801	0.442	0.475	1	mm10-Slc9a3r1
0.00221654	0.0772531	0.042	0.008	1	mm10-Gm36839
0.00221683	-0.0791643	0.024	0.073	1	mm10-Alpk1
0.00223704	-0.0862483	0.008	0.047	1	mm10-Ripk2
0.00224088	-0.305468	0.165	0.265	1	mm10-Chka
0.00224549	-0.0829972	0.01	0.052	1	mm10-C3ar1
0.00226975	0.141487	0.107	0.042	1	mm10-Madd
0.00227601	-0.0741849	0.013	0.055	1	mm10-AU020206
0.00228059	0.265896	0.204	0.134	1	mm10-Tmcc1
0.00228076	-0.0661694	0.005	0.039	1	mm10-Srek1
0.00229348	0.215712	0.369	0.289	1	mm10-Ogt
0.00229584	-0.076279	0.079	0.139	1	mm10-Gba
0.00229643	0.247549	0.366	0.328	1	mm10-Asph
0.00229979	-0.153725	0.369	0.493	1	mm10-Ctnnb1
0.00230839	-0.0706784	0.018	0.06	1	mm10-Phf11d
0.00231179	0.186217	0.27	0.178	1	mm10-Ywhab
0.00231187	0.102424	0.089	0.031	1	mm10-Tmc6
0.00231756	-0.127812	0.039	0.102	1	mm10-Sertad3
0.00232561	-0.12003	0.026	0.081	1	mm10-Cdk6
0.00232786	0.184047	0.49	0.367	1	mm10-Rbm25
0.0023438	-0.294708	0.16	0.249	1	mm10-Ankrd12
0.00235078	-0.0782965	0.013	0.058	1	mm10-Galnt6
0.00235361	0.131151	0.081	0.026	1	mm10-Arhgap5
0.00236488	0.081561	0.037	0.008	1	mm10-AU019990
0.0023652	0.159451	0.99	0.997	1	mm10-Tmsb4x
0.00236642	0.160197	0.105	0.045	1	mm10-Sp4
0.0023707	0.13822	0.068	0.024	1	mm10-Sik2
0.00239606	-0.176162	0.568	0.682	1	mm10-Lgals8
0.00240248	-0.261187	0.149	0.228	1	mm10-Prpf38b
0.00242417	-0.130211	0.055	0.126	1	mm10-Smpdl3a
0.00245491	0.152993	0.102	0.047	1	mm10-Nbeal1
0.00247112	0.119914	0.102	0.063	1	mm10-Itch
0.00248025	-0.16416	0.094	0.178	1	mm10-Tspyl1
0.00250055	0.315721	0.699	0.675	1	mm10-Osm
0.0025025	-0.159982	0.099	0.186	1	mm10-Plekhm2
0.00251861	-0.173982	0.531	0.648	1	mm10-Ogfrl1
0.00252136	0.147912	0.113	0.05	1	mm10-Prkag1
0.00254324	0.112926	0.073	0.034	1	mm10-Snrnp200
0.00255979	-0.152703	0.916	0.948	1	mm10-Ubb
0.0025647	0.145373	0.097	0.126	1	mm10-Clec1a
0.00256872	-0.0298223	0.058	0.097	1	mm10-Ccnt2
0.00258276	0.342136	0.105	0.076	1	mm10-Rgs1
0.00258737	0.131839	0.092	0.037	1	mm10-Bmt2
0.00260065	-0.157623	0.024	0.071	1	mm10-Ccdc138
0.00260102	-0.0244275	0.003	0.021	1	mm10-Gpd1l
0.00263303	0.235014	0.584	0.496	1	mm10-Zyx
0.00263858	0.17037	0.141	0.068	1	mm10-St13
0.00264234	0.0742516	0.073	0.024	1	mm10-Psmd10
0.00273864	0.243614	0.898	0.892	1	mm10-Slpi
0.00274156	0.201306	0.154	0.087	1	mm10-Tnfaip8
0.00276007	-0.0633553	0.031	0.076	1	mm10-Tnfrsf18
0.00276027	0.0598175	0.039	0.005	1	mm10-Peli2
0.00276507	0.160804	0.228	0.184	1	mm10-Rpl14
0.00277093	0.199906	0.28	0.184	1	mm10-Adssl1
0.00277534	0.197702	0.78	0.719	1	mm10-Eef1a1
0.00279949	-0.0594185	0.005	0.039	1	mm10-Zfp526
0.00280002	0.189115	0.584	0.604	1	mm10-Mrgpra2b
0.00280512	0.122701	0.11	0.045	1	mm10-Btaf1
0.00281795	-0.181953	0.168	0.262	1	mm10-Gca
0.0028269	0.170961	0.188	0.115	1	mm10-Ralb
0.00287485	0.207931	0.696	0.617	1	mm10-Spi1
0.00288215	0.224012	0.754	0.69	1	mm10-Tgif1
0.00291796	0.0529858	0.029	0.003	1	mm10-2010310C07Rik
0.00293347	-0.0304532	0	0.018	1	mm10-Lap3
0.00293347	-0.0310058	0	0.018	1	mm10-Parvb
0.00293347	-0.0393931	0	0.018	1	mm10-Slc36a3
0.00293347	-0.0310921	0	0.018	1	mm10-Arhgef10l
0.00293347	-0.0333418	0	0.018	1	mm10-Cfap20
0.00293347	-0.0284034	0	0.018	1	mm10-Slc30a5
0.00293347	-0.0296608	0	0.018	1	mm10-Gm10053
0.00293347	-0.0335329	0	0.018	1	mm10-Trp53rkb
0.00293347	-0.0373805	0	0.018	1	mm10-Nr1h3
0.00293347	-0.0334524	0	0.018	1	mm10-Terf2ip
0.00293347	-0.0378452	0	0.018	1	mm10-Ints7
0.002934	0.225964	0.932	0.913	1	mm10-Gadd45b
0.00294534	0.144572	0.165	0.084	1	mm10-Ddx50
0.00295137	0.165479	0.12	0.071	1	mm10-Kmt5b
0.00295747	-0.114738	0.102	0.181	1	mm10-Tpp1
0.00299126	0.0392466	0.018	0	1	mm10-Gm15448
0.00299126	0.0320484	0.018	0	1	mm10-Ercc1
0.00299126	0.0372692	0.018	0	1	mm10-Gm12981
0.00299126	0.0409593	0.018	0	1	mm10-Nedd4
0.00300414	0.215328	0.39	0.328	1	mm10-Kdm7a
0.00301525	0.158136	0.141	0.094	1	mm10-Kansl1
0.00301674	0.132299	0.123	0.168	1	mm10-Odc1
0.00305544	-0.194883	0.479	0.593	1	mm10-Sertad1
0.00305608	0.093589	0.099	0.087	1	mm10-Frg1
0.00305889	-0.0663791	0.005	0.039	1	mm10-Fam160a2
0.00309047	-0.159608	0.149	0.247	1	mm10-Nod2
0.00311123	-0.238036	0.547	0.646	1	mm10-Sub1
0.00311419	-0.272523	0.126	0.218	1	mm10-Tnfaip6
0.00312253	0.188844	0.209	0.126	1	mm10-Stk11
0.00314476	0.00540574	0.031	0.055	1	mm10-Slc6a13
0.00315006	-0.127552	0.042	0.105	1	mm10-Efcab14
0.00317782	-0.0710943	0.018	0.06	1	mm10-Qtrt1
0.00318905	-0.109151	0.034	0.092	1	mm10-Rnpepl1
0.00319515	0.332121	0.665	0.572	1	mm10-Dgat1
0.0032342	0.117368	0.099	0.047	1	mm10-Pram1
0.00324682	-0.211758	0.173	0.262	1	mm10-Pik3r1
0.00326087	-0.0364569	0.003	0.024	1	mm10-Sdc1
0.0032847	0.108906	0.162	0.089	1	mm10-Anks1
0.00329652	0.0964826	0.071	0.021	1	mm10-Smn1
0.00335536	-0.0862827	0.047	0.108	1	mm10-Srsf6
0.00338497	0.190118	0.343	0.239	1	mm10-Mthfsl
0.00340356	-0.122033	0.037	0.087	1	mm10-Atad1
0.00343661	0.188602	0.322	0.218	1	mm10-BC031181
0.0034416	-0.042522	0.024	0.06	1	mm10-Top3a
0.00345698	-0.171199	0.723	0.801	1	mm10-Sp110
0.00345935	0.121629	0.039	0.058	1	mm10-Il23a
0.00346124	0.122368	0.217	0.131	1	mm10-Slc25a20
0.00347022	-0.0643068	0.01	0.047	1	mm10-Stx3
0.00349751	0.207006	0.615	0.512	1	mm10-Irf2bp2
0.0035393	-0.0285809	0.113	0.168	1	mm10-Pkn2
0.00358554	0.0800164	0.055	0.013	1	mm10-Rab43
0.0036253	0.188607	0.461	0.367	1	mm10-Eef1b2
0.00367501	0.104545	0.065	0.021	1	mm10-Ifitm5
0.00369261	0.128908	1	0.997	1	mm10-Mxd1
0.0037031	0.215043	0.482	0.386	1	mm10-Rps7
0.00374976	-0.148556	0.058	0.121	1	mm10-Med12l
0.00377237	-0.0748148	0.01	0.05	1	mm10-Slc7a8
0.0037753	-0.230618	0.225	0.333	1	mm10-Ltb
0.00379834	-0.122476	0.016	0.06	1	mm10-Tlr7
0.00380396	-0.0784534	0.052	0.108	1	mm10-Sash3
0.00381805	-0.0738664	0.008	0.045	1	mm10-Mtpap
0.00387539	0.248571	0.212	0.155	1	mm10-Tagln2
0.00387944	-0.116998	0.039	0.097	1	mm10-Pi4k2a
0.00387974	0.192675	0.455	0.367	1	mm10-Stat6
0.0039013	0.105487	0.741	0.63	1	mm10-Ostf1
0.00392065	0.100353	0.113	0.05	1	mm10-Ankrd46
0.00394336	0.255472	0.364	0.299	1	mm10-Eea1
0.00395338	-0.0729634	0.003	0.031	1	mm10-2310031A07Rik
0.00396377	0.082327	0.055	0.018	1	mm10-Stx8
0.00397173	-0.183336	0.374	0.491	1	mm10-Psma3
0.00397965	0.163316	0.246	0.22	1	mm10-Pnpo
0.00398652	-0.261006	0.149	0.205	1	mm10-Hgsnat
0.00401925	-0.131719	0.079	0.139	1	mm10-Scyl2
0.00404372	-0.226533	0.249	0.346	1	mm10-Capg
0.00404925	-0.101948	0.013	0.055	1	mm10-Man1a
0.00412503	-0.217796	0.291	0.388	1	mm10-Mitd1
0.0041271	0.157847	0.128	0.066	1	mm10-Ncoa2
0.00415101	0.223623	0.246	0.16	1	mm10-Herpud1
0.00420562	-0.125608	0.314	0.425	1	mm10-Cln3
0.00421225	0.157356	0.165	0.115	1	mm10-Gnl1
0.00421945	-0.0400364	0.031	0.071	1	mm10-Aebp2
0.0042562	0.0955081	0.131	0.121	1	mm10-Col4a3bp
0.0042663	-0.0792552	0.018	0.063	1	mm10-Gpr18
0.00433781	-0.109885	0.031	0.084	1	mm10-Snx5
0.00435903	-0.0422423	0.003	0.026	1	mm10-Renbp
0.00436452	-0.254355	0.173	0.257	1	mm10-Zfp622
0.00441552	-0.148748	0.097	0.178	1	mm10-Etv3
0.00448134	-0.128765	0.029	0.081	1	mm10-Tmem50b
0.00453155	-0.0487678	0.005	0.034	1	mm10-Cenpj
0.00455883	0.163401	0.246	0.173	1	mm10-Chd1
0.00458783	0.242286	0.618	0.512	1	mm10-Clec4n
0.00460789	-0.135769	0.047	0.11	1	mm10-Elmod3
0.00461618	0.166365	0.599	0.543	1	mm10-Cltc
0.00461863	0.219574	0.291	0.199	1	mm10-Gm20406
0.00464315	0.244822	0.539	0.48	1	mm10-Lpin2
0.00464534	0.146079	0.277	0.178	1	mm10-Snrpc
0.00464753	-0.213893	0.408	0.517	1	mm10-Fnip1
0.00465505	-0.0495486	0.047	0.092	1	mm10-Gtf2h1
0.00465766	0.215862	0.448	0.381	1	mm10-Kmt2e
0.00469093	-0.0835231	0.008	0.042	1	mm10-Slc37a2
0.00471853	0.161483	0.178	0.134	1	mm10-Plekha2
0.00473584	-0.0557388	0.005	0.037	1	mm10-Epg5
0.00478981	-0.253379	0.335	0.436	1	mm10-Cd84
0.00479915	-0.218448	0.49	0.588	1	mm10-Ubald2
0.00480551	-0.0980605	0.018	0.063	1	mm10-Akt3
0.00483685	0.197099	0.552	0.441	1	mm10-Olr1
0.0048384	0.154845	0.314	0.291	1	mm10-Serinc1
0.00484776	0.206059	0.249	0.168	1	mm10-Impact
0.0048678	0.074607	0.037	0.005	1	mm10-Fastk
0.0048711	-0.126339	0.037	0.087	1	mm10-Pdha1
0.00490543	0.0544694	0.034	0.005	1	mm10-Glod4
0.00490826	-0.138435	0.382	0.499	1	mm10-Mvp
0.00493331	-0.0541005	0.003	0.029	1	mm10-Kmo
0.00498297	-0.0597831	0.003	0.029	1	mm10-Snrnp35
0.00498526	-0.0936929	0.021	0.068	1	mm10-Meig1
0.0050044	0.188442	0.275	0.186	1	mm10-Wapl
0.00502475	-0.0795961	0.021	0.068	1	mm10-Mfsd12
0.00503708	-0.127256	0.586	0.698	1	mm10-Nlrc5
0.00505103	-0.0621994	0.047	0.1	1	mm10-Endov
0.00511183	-0.157622	0.188	0.286	1	mm10-Atp11a
0.00511726	0.0945547	0.081	0.029	1	mm10-Atp5g2
0.00514713	-0.0788624	0.068	0.126	1	mm10-Arid1a
0.00517224	-0.038247	0.021	0.066	1	mm10-2010005H15Rik
0.00522622	-0.116567	0.042	0.1	1	mm10-Selenow
0.00523092	-0.0799726	0.021	0.066	1	mm10-S100a10
0.00523785	-0.198311	0.191	0.286	1	mm10-Rffl
0.00525919	-0.169498	0.257	0.365	1	mm10-Ap1g1
0.00526285	0.141029	0.102	0.045	1	mm10-Opa3
0.00530207	-0.147957	0.097	0.168	1	mm10-Oser1
0.00531526	0.118014	0.084	0.037	1	mm10-Vapb
0.00535227	-0.214412	0.393	0.504	1	mm10-Rps20
0.00539858	0.105683	0.086	0.058	1	mm10-Hip1
0.00547675	0.224734	0.139	0.1	1	mm10-Tmem88
0.0054917	0.173362	0.12	0.055	1	mm10-Prkd3
0.00550409	0.148046	0.241	0.15	1	mm10-Vamp3
0.00550896	0.15167	0.327	0.32	1	mm10-Clk4
0.00552128	0.176449	0.283	0.223	1	mm10-R3hdm4
0.0055903	0.160888	0.115	0.055	1	mm10-Runx2
0.00559891	-0.0552461	0.003	0.026	1	mm10-Ctla4
0.00561041	0.174998	0.223	0.152	1	mm10-Padi4
0.00561466	0.21864	0.45	0.362	1	mm10-Pxk
0.00562653	0.183658	0.453	0.373	1	mm10-Luc7l2
0.00569578	-0.0160577	0.11	0.152	1	mm10-Myo9b
0.00571378	0.184841	0.262	0.168	1	mm10-Emp3
0.00572059	0.16575	0.228	0.181	1	mm10-Blcap
0.00574853	-0.180066	0.526	0.635	1	mm10-Rsrp1
0.00575042	-0.0527974	0.005	0.034	1	mm10-Ccl24
0.00575625	0.148577	0.183	0.102	1	mm10-Agtpbp1
0.00585562	-0.146773	0.058	0.123	1	mm10-Tns3
0.00591178	0.111857	0.094	0.039	1	mm10-Ppp6c
0.00591233	0.222113	0.369	0.315	1	mm10-Tnip1
0.00591373	-0.0296188	0.003	0.024	1	mm10-Tnfrsf9
0.00591816	0.0375754	0.029	0.021	1	mm10-Cog2
0.00594671	0.117467	0.118	0.055	1	mm10-Mrpl54
0.0059473	-0.0444984	0.029	0.066	1	mm10-Tmem229b
0.00595821	0.137181	0.094	0.039	1	mm10-Ccdc82
0.00599936	0.197016	0.186	0.11	1	mm10-Dgkg
0.00600706	0.209926	0.751	0.698	1	mm10-Adgre5
0.00616633	-0.207586	0.387	0.501	1	mm10-Plgrkt
0.00617144	0.169571	0.296	0.205	1	mm10-Ppard
0.00617444	0.182016	0.351	0.315	1	mm10-Il4ra
0.00618216	0.160951	0.181	0.118	1	mm10-Zkscan6
0.0062011	-0.0833321	0.01	0.045	1	mm10-Ap1b1
0.00624312	0.167301	0.484	0.407	1	mm10-Rps2
0.00624342	-0.028365	0	0.016	1	mm10-Rftn1
0.00624342	-0.0251881	0	0.016	1	mm10-Mon1a
0.00624342	-0.0252492	0	0.016	1	mm10-Pigf
0.00624342	-0.0321675	0	0.016	1	mm10-Samd11
0.00624342	-0.0223297	0	0.016	1	mm10-Pak4
0.00624342	-0.0383776	0	0.016	1	mm10-Serhl
0.00624342	-0.0250604	0	0.016	1	mm10-Tmem26
0.00624342	-0.0325221	0	0.016	1	mm10-Pik3c3
0.00624342	-0.0309449	0	0.016	1	mm10-Emc8
0.00624342	-0.0223693	0	0.016	1	mm10-Cmtm3
0.00624342	-0.0265045	0	0.016	1	mm10-Ddb2
0.00624342	-0.0355643	0	0.016	1	mm10-Myo1e
0.00624348	0.171736	0.416	0.318	1	mm10-Brk1
0.0062455	-0.204271	0.131	0.218	1	mm10-Syne1
0.0062663	-0.0356091	0.071	0.039	1	mm10-Olfm4
0.0062867	0.0955177	0.097	0.042	1	mm10-Trnt1
0.0063015	-0.176463	0.707	0.803	1	mm10-Socs3
0.00633672	0.080637	0.055	0.021	1	mm10-Zfp523
0.00634932	0.0300511	0.016	0	1	mm10-Ppdpf
0.00634932	0.0451178	0.016	0	1	mm10-Ppbp
0.00634932	0.0246247	0.016	0	1	mm10-Stk39
0.00634932	0.0284641	0.016	0	1	mm10-D17H6S53E
0.00634932	0.0290042	0.016	0	1	mm10-Agr2
0.00634932	0.0319253	0.016	0	1	mm10-Med24
0.00634932	0.0313411	0.016	0	1	mm10-Krt10
0.00634932	0.0268271	0.016	0	1	mm10-Gpr55
0.00637158	-0.180881	0.346	0.451	1	mm10-Raly
0.00642428	0.0991256	0.06	0.018	1	mm10-Arsg
0.00647894	0.23786	0.594	0.535	1	mm10-Nadk
0.00652052	0.178859	0.335	0.255	1	mm10-Rnf130
0.00652655	0.217189	0.356	0.265	1	mm10-Trpm2
0.00654939	0.105774	0.092	0.037	1	mm10-Zbtb11
0.00657352	-0.0978265	0.031	0.084	1	mm10-C2cd3
0.00658491	0.167507	0.351	0.257	1	mm10-Nedd8
0.00661892	0.179267	0.804	0.756	1	mm10-Ddx3x
0.00664266	0.134575	0.521	0.407	1	mm10-Pet100
0.00672101	0.0169389	0.406	0.472	1	mm10-Tbk1
0.0067805	0.0753626	0.099	0.045	1	mm10-Gpatch2l
0.00686577	-0.0947672	0.071	0.136	1	mm10-Rps27l
0.00692962	0.263315	0.712	0.675	1	mm10-Cdk2ap2
0.00695612	-0.26823	0.49	0.533	1	mm10-Sqstm1
0.0069944	-0.0509198	0.005	0.034	1	mm10-Cfb
0.00701112	0.235248	0.5	0.42	1	mm10-Rock1
0.0070766	0.0720625	0.039	0.01	1	mm10-Susd3
0.00714053	-0.0898854	0.063	0.121	1	mm10-Aph1c
0.00724427	0.189932	0.173	0.123	1	mm10-Pdzd8
0.0072579	-0.0775625	0.024	0.068	1	mm10-Atl2
0.0073233	0.15258	0.843	0.782	1	mm10-Arpc5
0.00733734	0.113567	0.12	0.058	1	mm10-Sqor
0.00740417	0.183366	0.28	0.192	1	mm10-Cnn2
0.00747211	-0.161208	0.453	0.562	1	mm10-Wsb1
0.00748036	-0.0669239	0.005	0.034	1	mm10-Vwa5a
0.00748126	0.131333	0.118	0.058	1	mm10-Ube2j2
0.00749227	0.0797639	0.134	0.073	1	mm10-Atp5d
0.00751249	0.134885	0.144	0.084	1	mm10-Dad1
0.00753715	-0.100831	0.008	0.034	1	mm10-Lztfl1
0.00758433	0.0839259	0.05	0.013	1	mm10-Entpd3
0.0075913	-0.176618	0.267	0.37	1	mm10-Arhgap25
0.00759188	-0.176113	0.16	0.249	1	mm10-Itgb1
0.00760244	0.0788552	0.073	0.026	1	mm10-Dnajb2
0.00765996	0.0028013	0.173	0.207	1	mm10-Cyb5r4
0.00773672	-0.178981	0.217	0.315	1	mm10-Atf6
0.00776078	0.166339	0.12	0.06	1	mm10-Nfe2
0.00776287	-0.0659868	0.013	0.05	1	mm10-Cacnb2
0.00777393	0.17958	0.202	0.126	1	mm10-Camk1d
0.00779158	-0.0483762	0.005	0.034	1	mm10-Igsf8
0.00782488	0.0687296	0.034	0.005	1	mm10-Zfp831
0.00786486	-0.139959	0.024	0.068	1	mm10-Gucy2c
0.00786594	-0.0925085	0.021	0.066	1	mm10-Sdc4
0.0078719	-0.153261	0.081	0.152	1	mm10-Ly96
0.00794183	0.0974658	0.06	0.021	1	mm10-Fam193a
0.00799547	-0.0841985	0.016	0.055	1	mm10-Eps8
0.00806719	0.189274	0.579	0.509	1	mm10-Hectd1
0.00807574	0.129766	0.228	0.142	1	mm10-Prkcb
0.00811777	0.163822	0.309	0.213	1	mm10-Arhgap15
0.00812138	-0.168127	0.118	0.199	1	mm10-Phip
0.008139	0.160398	0.243	0.165	1	mm10-Rpl12
0.00813958	0.138905	0.131	0.089	1	mm10-Zfp638
0.00825281	0.0963279	0.079	0.029	1	mm10-Fbxo42
0.00828911	-0.163952	0.997	1	1	mm10-Il1rn
0.00834214	-0.133395	0.01	0.045	1	mm10-Hspa2
0.00838055	0.147311	0.115	0.063	1	mm10-Acsl5
0.00838373	-0.0403617	0.003	0.026	1	mm10-Myof
0.00840317	0.107719	0.126	0.089	1	mm10-Tmem156
0.00841225	0.0633112	0.071	0.029	1	mm10-Borcs5
0.00847919	0.173556	0.393	0.323	1	mm10-Rpl29
0.00848769	0.0664974	0.055	0.016	1	mm10-Dgka
0.00849475	0.156933	0.233	0.147	1	mm10-Senp2
0.00855178	0.107656	0.102	0.045	1	mm10-Dip2b
0.00856681	-0.121034	0.086	0.157	1	mm10-Atp6v1h
0.00860176	0.180764	0.524	0.438	1	mm10-Tuba1c
0.00865831	0.0707305	0.128	0.071	1	mm10-Sipa1l2
0.00869167	-0.206908	0.267	0.37	1	mm10-Nrros
0.00876688	0.0894714	0.359	0.412	1	mm10-Chd4
0.00877656	0.105304	0.094	0.039	1	mm10-Mindy1
0.00877836	0.166604	0.233	0.157	1	mm10-Aldh2
0.00887987	0.121654	0.097	0.045	1	mm10-Gsto1
0.00889405	0.210277	0.243	0.163	1	mm10-Mmp8
0.00894414	-0.153558	0.139	0.218	1	mm10-Nipa2
0.00894608	-0.136903	0.107	0.178	1	mm10-Rbck1
0.00902438	-0.0629341	0.005	0.034	1	mm10-Msr1
0.00907006	-0.109714	0.047	0.105	1	mm10-Ngdn
0.00909178	0.131561	0.105	0.05	1	mm10-Atxn7
0.00909255	0.110855	0.089	0.037	1	mm10-Ceacam10
0.00917593	-0.115844	0.194	0.283	1	mm10-Ankrd13a
0.00917739	-0.05718	0.005	0.034	1	mm10-Pop4
0.00923418	0.189449	0.516	0.423	1	mm10-Rps26
0.00934355	-0.0521407	0.005	0.034	1	mm10-Irf8
0.00942715	-0.199492	0.492	0.514	1	mm10-Il10ra
0.00949379	0.147905	0.882	0.845	1	mm10-Sem1
0.0094988	0.0987318	0.113	0.052	1	mm10-Pdcl3
0.00959327	-0.180726	0.416	0.467	1	mm10-Sumo1
0.00960195	0.166962	0.644	0.543	1	mm10-Selplg
0.00963638	-0.0566215	0.005	0.034	1	mm10-Aig1
0.00968212	0.15516	0.408	0.402	1	mm10-Osbpl9
0.00971675	0.161158	0.233	0.163	1	mm10-Rab31
0.009801	-0.113595	0.031	0.081	1	mm10-Gfpt1
0.0098616	0.07908	0.047	0.013	1	mm10-Mcts1
0.00986319	-0.0657126	0.005	0.034	1	mm10-Casp6
0.00988342	-0.0499987	0.005	0.034	1	mm10-Kars
0.00993341	-0.0186042	0.435	0.514	1	mm10-Morc3
0.00995608	-0.149343	0.094	0.168	1	mm10-Dnaja2
0.00998683	0.137704	0.068	0.029	1	mm10-Gm17056
0.00999175	-0.146713	0.092	0.163	1	mm10-Rnf38
0.0100481	0.211259	0.479	0.399	1	mm10-Il17ra
0.0101837	0.158995	0.369	0.289	1	mm10-Uba52
0.0102201	0.232778	0.099	0.05	1	mm10-Mat2b
0.0102369	-0.0501228	0.003	0.026	1	mm10-Olfr1395
0.0102681	0.101381	0.081	0.031	1	mm10-Kctd11
0.010298	0.070268	0.045	0.01	1	mm10-5430425K12Rik
0.0103193	0.0860216	0.081	0.031	1	mm10-Dynlt1f
0.0103292	0.060426	0.037	0.01	1	mm10-Mmd
0.0103551	-0.1694	0.414	0.514	1	mm10-Pgs1
0.0104202	0.229597	0.369	0.276	1	mm10-Gadd45a
0.0104454	0.184395	0.188	0.134	1	mm10-Hdac4
0.0105388	-0.138251	0.039	0.068	1	mm10-Tecpr1
0.0106235	-0.063034	0.058	0.113	1	mm10-Crip1
0.0106298	-0.120444	0.076	0.142	1	mm10-Dpm2
0.0106524	0.178512	0.416	0.323	1	mm10-Wdr1
0.0106569	-0.10485	0.029	0.076	1	mm10-Gm19412
0.0106608	-0.134733	0.076	0.123	1	mm10-Tuba4a
0.010665	-0.0570632	0.016	0.05	1	mm10-Slc25a45
0.0107086	-0.0989686	0.024	0.068	1	mm10-P2rx4
0.0107849	-0.0393962	0.003	0.021	1	mm10-Gle1
0.0109179	0.0965055	0.997	0.995	1	mm10-Litaf
0.0109979	0.159785	0.277	0.192	1	mm10-1600010M07Rik
0.0110904	-0.0801137	0.021	0.063	1	mm10-Cyb5b
0.0111611	-0.0896642	0.047	0.1	1	mm10-Rere
0.0111983	-0.0903818	0.128	0.197	1	mm10-Arnt
0.0112181	-0.0502915	0.008	0.037	1	mm10-Zmym3
0.011266	0.0393609	0.113	0.073	1	mm10-Sec16a
0.0112777	-0.0441792	0.073	0.121	1	mm10-Bid
0.0113911	-0.0427309	0.003	0.024	1	mm10-Il21r
0.0114608	0.163015	0.149	0.084	1	mm10-Mafg
0.0114638	0.0685424	0.058	0.037	1	mm10-Pstpip2
0.0114673	0.0788663	0.058	0.021	1	mm10-Eif3g
0.0114761	-0.0726488	0.008	0.039	1	mm10-Cpeb3
0.0114867	-0.05764	0.008	0.039	1	mm10-Lat2
0.011496	-0.0762743	0.008	0.029	1	mm10-Cab39l
0.0115311	0.136831	0.733	0.701	1	mm10-Myl12b
0.0115443	0.0658935	0.05	0.013	1	mm10-Mob2
0.0115924	0.101299	0.105	0.071	1	mm10-Ikbkb
0.0117121	0.116081	0.123	0.063	1	mm10-Nfkbil1
0.0119114	-0.0898872	0.102	0.165	1	mm10-Sec61a1
0.0119758	-0.0496618	0.003	0.026	1	mm10-Dusp28
0.0119816	-0.0048796	0.003	0.013	1	mm10-Gm45620
0.0120522	0.0626501	0.026	0.003	1	mm10-Catip
0.0121279	0.0888544	0.047	0.013	1	mm10-Pim3
0.0121935	-0.026978	0.005	0.026	1	mm10-P2ry10b
0.0122814	0.102863	0.068	0.029	1	mm10-Nsun6
0.0122832	-0.106527	0.508	0.614	1	mm10-Zc3h7a
0.0123405	0.155819	0.246	0.16	1	mm10-Rin3
0.0123719	-0.158078	0.382	0.488	1	mm10-Homer1
0.0123896	-0.159692	0.196	0.286	1	mm10-Mrpl30
0.0124056	0.0964271	0.037	0.008	1	mm10-Rad51c
0.0124444	0.12406	0.068	0.045	1	mm10-Nin
0.0124556	0.13703	0.573	0.467	1	mm10-Atox1
0.0124826	-0.0108072	0.113	0.15	1	mm10-Hprt
0.0125137	0.167137	0.626	0.564	1	mm10-Bcl2l11
0.0125414	0.170481	0.552	0.493	1	mm10-Rac1
0.0126136	0.195487	0.251	0.22	1	mm10-Creb1
0.0126245	0.15141	0.123	0.073	1	mm10-Cebpz
0.0126446	0.098165	0.045	0.013	1	mm10-Bend4
0.0126693	-0.197543	0.209	0.294	1	mm10-Ghitm
0.0127334	-0.19988	0.312	0.391	1	mm10-Katna1
0.0127876	-0.055514	0.008	0.037	1	mm10-Rps6kc1
0.012792	-0.120902	0.06	0.121	1	mm10-Glmp
0.0127958	0.164817	0.126	0.081	1	mm10-Mxi1
0.0128265	-0.137291	0.652	0.745	1	mm10-Atp6v1e1
0.0128368	-0.114528	0.084	0.15	1	mm10-E130102H24Rik
0.0128513	-0.161188	0.259	0.354	1	mm10-Psmb4
0.0128873	0.176057	0.249	0.165	1	mm10-Pds5a
0.0130445	-0.162817	0.196	0.283	1	mm10-Stx7
0.0131359	-0.0809863	0.01	0.042	1	mm10-Ms4a7
0.0131405	0.163703	0.241	0.186	1	mm10-Fmnl3
0.0132771	0.10596	0.123	0.063	1	mm10-Zfr
0.0133822	-0.023697	0	0.013	1	mm10-Gm6034
0.0133822	-0.0378763	0	0.013	1	mm10-Ccnf
0.0133822	-0.0194205	0	0.013	1	mm10-Adap2os
0.0133822	-0.0225704	0	0.013	1	mm10-Klf11
0.0133822	-0.0187274	0	0.013	1	mm10-Plekhg4
0.0133822	-0.0258405	0	0.013	1	mm10-Bag3
0.0133822	-0.0253153	0	0.013	1	mm10-Bcar3
0.0133822	-0.0224546	0	0.013	1	mm10-Pqlc2
0.0133822	-0.019002	0	0.013	1	mm10-Tmem60
0.0133822	-0.0315545	0	0.013	1	mm10-Bcl2
0.0133822	-0.0218606	0	0.013	1	mm10-Trmt6
0.0133822	-0.0300965	0	0.013	1	mm10-Timm10
0.0133822	-0.0212146	0	0.013	1	mm10-Coq10a
0.0133822	-0.0244828	0	0.013	1	mm10-Capn2
0.0133822	-0.024327	0	0.013	1	mm10-Tsta3
0.0133822	-0.0259039	0	0.013	1	mm10-Fkbp11
0.0133822	-0.0352524	0	0.013	1	mm10-Unc80
0.0133822	-0.0258853	0	0.013	1	mm10-Socs2
0.0133822	-0.0282109	0	0.013	1	mm10-Ldhd
0.0133822	-0.0350596	0	0.013	1	mm10-Hdac3
0.0133822	-0.0324348	0	0.013	1	mm10-Gm16181
0.0134173	-0.0495654	0.003	0.026	1	mm10-Msh3
0.0134813	0.104974	0.113	0.055	1	mm10-Fam13b
0.0134817	-0.0334075	0.073	0.115	1	mm10-Znrf2
0.0135331	-0.0617738	0.003	0.026	1	mm10-Fam20c
0.0135606	-0.0451183	0.003	0.026	1	mm10-Lpxn
0.0135727	0.031084	0.013	0	1	mm10-Ranbp6
0.0135727	0.0210761	0.013	0	1	mm10-Qpctl
0.0135727	0.0252067	0.013	0	1	mm10-Zfp414
0.0135727	0.0281861	0.013	0	1	mm10-Tff1
0.0135727	0.0153991	0.013	0	1	mm10-Emx2
0.0135727	0.0317883	0.013	0	1	mm10-Timm44
0.0135727	0.0260033	0.013	0	1	mm10-Zfp174
0.0135727	0.0237056	0.013	0	1	mm10-Calml3
0.0135727	0.0214921	0.013	0	1	mm10-Tada2b
0.0135727	0.0265269	0.013	0	1	mm10-Ppan
0.0135727	0.0362458	0.013	0	1	mm10-Gm48065
0.0135727	0.0292349	0.013	0	1	mm10-Slc7a1
0.0135727	0.0253284	0.013	0	1	mm10-Gm26773
0.0135727	0.0215202	0.013	0	1	mm10-Guk1
0.0135727	0.0315345	0.013	0	1	mm10-Muc1
0.0135727	0.0293457	0.013	0	1	mm10-Gm36159
0.0135727	0.0260855	0.013	0	1	mm10-Ric8b
0.0135727	0.0240267	0.013	0	1	mm10-Moap1
0.0135727	0.023756	0.013	0	1	mm10-Stn1
0.0135727	0.022383	0.013	0	1	mm10-Gm45345
0.0135727	0.0166585	0.013	0	1	mm10-Sae1
0.0136247	-0.131521	0.063	0.121	1	mm10-Cryzl1
0.0137269	-0.0419643	0.003	0.026	1	mm10-Gm49207
0.0137987	-0.0622589	0.005	0.031	1	mm10-Plin3
0.0138274	0.0763338	0.136	0.079	1	mm10-Arhgap4
0.0138903	-0.0831293	0.026	0.071	1	mm10-Ppip5k2
0.0139155	0.183164	0.319	0.247	1	mm10-Ppia
0.0139434	0.0686818	0.971	0.995	1	mm10-Cd52
0.0139771	-0.0796878	0.024	0.06	1	mm10-Snx1
0.0139913	-0.0221501	0.202	0.255	1	mm10-Pfkfb4
0.0140644	0.0695166	0.034	0.008	1	mm10-Gm20342
0.014072	0.0423428	0.026	0.003	1	mm10-Clasp1
0.0142073	0.100814	0.094	0.052	1	mm10-Trappc10
0.0142253	0.165805	0.652	0.585	1	mm10-Sde2
0.0142377	-0.0560307	0.058	0.1	1	mm10-Vhl
0.0142569	0.198304	0.327	0.234	1	mm10-Ptpre
0.0143025	0.0751276	0.039	0.01	1	mm10-Prr14l
0.0143537	-0.0646827	0.003	0.024	1	mm10-Fzd7
0.0144461	0.105536	0.065	0.024	1	mm10-Retn
0.0144646	0.0957479	0.079	0.031	1	mm10-Vamp5
0.0144668	0.147558	0.17	0.105	1	mm10-Mctp1
0.0145262	0.129494	0.126	0.066	1	mm10-Phf3
0.0145711	0.13103	0.128	0.079	1	mm10-Trpc4ap
0.0146831	0.145683	0.291	0.223	1	mm10-Ube2i
0.0147674	0.0802	0.037	0.008	1	mm10-Cc2d2b
0.0148311	-0.206015	0.194	0.273	1	mm10-Rnh1
0.014859	-0.0716798	0.013	0.045	1	mm10-Tma16
0.014901	-0.0699282	0.448	0.543	1	mm10-Atf7ip
0.0149121	0.14434	0.186	0.144	1	mm10-Chic2
0.0149283	-0.0715275	0.723	0.811	1	mm10-Abr
0.0150439	-0.0274825	0.021	0.05	1	mm10-Acp2
0.0151052	0.136058	0.139	0.079	1	mm10-Wbp1l
0.0151146	0.0162475	0.026	0.034	1	mm10-Zmat1
0.015144	0.141531	0.728	0.677	1	mm10-Chchd2
0.0152515	0.0951572	0.113	0.055	1	mm10-Hist2h2aa1
0.0152761	-0.112017	0.853	0.906	1	mm10-Trim30b
0.0153032	0.0946989	0.144	0.144	1	mm10-Pcmtd1
0.01531	-0.0366934	0.013	0.039	1	mm10-Fam96a
0.0153776	0.042382	0.055	0.079	1	mm10-Itpr1
0.0154162	0.186792	0.531	0.488	1	mm10-Pgam1
0.0155125	-0.033292	0.008	0.031	1	mm10-Rnf5
0.0155905	0.064413	0.11	0.058	1	mm10-Slc30a9
0.0156177	-0.0523226	0.008	0.037	1	mm10-Wdr43
0.0156223	0.0131282	0.055	0.076	1	mm10-Slfn3
0.0156349	0.0333423	0.081	0.092	1	mm10-Sdhaf2
0.01566	-0.0460854	0.005	0.031	1	mm10-Ehmt2
0.0157483	0.141554	0.262	0.176	1	mm10-Svil
0.0157712	0.0568802	0.191	0.213	1	mm10-Epb41l2
0.0158113	-0.214084	0.435	0.517	1	mm10-Wipf1
0.0158511	0.0781984	0.065	0.024	1	mm10-Krt14
0.0158903	0.0555812	0.031	0.005	1	mm10-Gm39121
0.0159057	-0.15263	0.199	0.286	1	mm10-Fnbp4
0.0159143	-0.0578376	0.01	0.037	1	mm10-Gpsm1
0.0159226	-0.0700455	0.005	0.031	1	mm10-Gusb
0.0159429	-0.0749449	0.094	0.155	1	mm10-9530068E07Rik
0.0159563	0.0754339	0.34	0.344	1	mm10-Rnf34
0.0159715	-0.0960244	0.115	0.184	1	mm10-Plekhf2
0.0159782	0.101816	0.327	0.378	1	mm10-Slc38a1
0.016062	0.00908972	0.026	0.039	1	mm10-Slc7a5
0.016103	0.0823908	0.06	0.037	1	mm10-Gtf2e2
0.016108	0.252193	0.217	0.157	1	mm10-Trf
0.0161801	-0.0745359	0.01	0.037	1	mm10-Tmem173
0.0162415	0.158932	0.393	0.31	1	mm10-Mapre1
0.0162643	0.0906442	0.086	0.039	1	mm10-Rnaset2b
0.0163257	0.10822	0.068	0.026	1	mm10-Gm37168
0.0164488	0.136274	0.128	0.071	1	mm10-Ap1s2
0.0164539	0.197219	0.181	0.113	1	mm10-Apoe
0.0165028	-0.0164744	0.01	0.029	1	mm10-Elmo2
0.0165106	0.00767288	0.052	0.031	1	mm10-Prpf31
0.0166432	-0.0342898	0.013	0.037	1	mm10-Map1s
0.0166523	0.103043	0.204	0.21	1	mm10-Sap18
0.0167822	0.0582225	0.031	0.005	1	mm10-Tmem57
0.016881	0.0804098	0.065	0.024	1	mm10-Fopnl
0.0168949	-0.110932	0.079	0.142	1	mm10-Mbd6
0.0169029	-0.0830578	0.047	0.1	1	mm10-Spg21
0.0169102	0.0608666	0.055	0.021	1	mm10-Prkaa1
0.0169669	0.120468	0.136	0.073	1	mm10-Snx4
0.0169884	0.186184	0.5	0.412	1	mm10-Ubxn4
0.0169953	0.0181529	0.071	0.1	1	mm10-Plpbp
0.0170575	0.096959	0.084	0.052	1	mm10-Cdc27
0.0171205	-0.0503799	0.003	0.024	1	mm10-Cd180
0.0172943	0.0991878	0.058	0.029	1	mm10-Abcf1
0.0173018	-0.0602004	0.005	0.031	1	mm10-Papd5
0.0173366	-0.0439985	0.102	0.152	1	mm10-Ttc39c
0.0175066	-0.0556773	0.005	0.031	1	mm10-Mms19
0.0176289	0.0993725	0.089	0.039	1	mm10-Cpsf6
0.0176477	-0.05233	0.021	0.055	1	mm10-Wrn
0.0176632	-0.070896	0.094	0.15	1	mm10-1700019L13Rik
0.0176814	0.154488	0.508	0.407	1	mm10-Ppp1r10
0.0177604	0.128978	0.131	0.089	1	mm10-Zmynd11
0.0177761	-0.151521	0.17	0.244	1	mm10-Lsm14a
0.0177917	-0.0207183	0.026	0.05	1	mm10-Mfsd11
0.017814	-0.0587778	0.005	0.031	1	mm10-Col4a2
0.0178521	-0.114223	0.068	0.129	1	mm10-Trim8
0.0178855	-0.0518983	0.005	0.021	1	mm10-Rragd
0.0178879	0.110136	0.071	0.029	1	mm10-E230001N04Rik
0.0179647	-0.135506	0.194	0.281	1	mm10-Nfyb
0.01804	0.165174	0.634	0.549	1	mm10-Zc3h12a
0.0181635	0.184998	0.385	0.336	1	mm10-Xbp1
0.0182906	-0.0696051	0.029	0.071	1	mm10-Atp10a
0.0183277	0.0562007	0.039	0.01	1	mm10-L1cam
0.0183475	-0.0243777	0.018	0.042	1	mm10-Sf3a2
0.018428	0.0572464	0.079	0.079	1	mm10-Pdpn
0.0184474	-0.017052	0.188	0.239	1	mm10-Rpl31
0.018448	0.118459	0.131	0.071	1	mm10-Trmt112
0.0184975	0.000428322	0.018	0.037	1	mm10-Rasa1
0.0185226	-0.0670723	0.563	0.654	1	mm10-Mbd2
0.018526	0.0701116	0.045	0.013	1	mm10-Gm40787
0.018527	0.0358946	0.031	0.008	1	mm10-Tmco4
0.0186629	-0.148612	0.599	0.669	1	mm10-Ppt1
0.0186862	0.162269	0.22	0.144	1	mm10-Btbd7
0.0186975	0.0963724	0.073	0.031	1	mm10-Cnot7
0.0187262	-0.0364679	0.005	0.026	1	mm10-Mtmr10
0.0187326	0.0317244	0.128	0.163	1	mm10-Crlf3
0.0187538	0.104139	0.118	0.06	1	mm10-Spidr
0.0188522	0.175924	0.817	0.766	1	mm10-March7
0.0189106	-0.0526159	0.008	0.037	1	mm10-Arhgap11a
0.019112	-0.081026	0.021	0.06	1	mm10-Snx8
0.0191347	0.163796	0.34	0.252	1	mm10-Tcn2
0.0192713	-0.127531	0.73	0.782	1	mm10-Samd9l
0.0192839	0.0830505	0.11	0.089	1	mm10-Atf2
0.0193308	-0.0521788	0.008	0.037	1	mm10-AI504432
0.0193882	-0.0720915	0.22	0.299	1	mm10-Inpp5a
0.0193969	-0.0727551	0.026	0.068	1	mm10-Psmd3
0.01946	0.0838688	0.058	0.021	1	mm10-Mapkap1
0.0195263	-0.0978251	0.031	0.071	1	mm10-Ahcyl2
0.0195419	0.123102	0.089	0.042	1	mm10-Bclaf3
0.0195631	0.0661672	0.042	0.01	1	mm10-Eml1
0.0196345	-0.133912	0.102	0.168	1	mm10-Map3k3
0.0197236	-0.0461629	0.024	0.055	1	mm10-Nudt9
0.0197993	0.155159	0.23	0.181	1	mm10-Cep350
0.0198189	-0.0185998	0.288	0.354	1	mm10-Myo1f
0.0198431	-0.0721559	0.178	0.247	1	mm10-Arhgap45
0.0198548	-0.142821	0.115	0.186	1	mm10-Arl8b
0.0199219	0.0668477	0.037	0.008	1	mm10-Stambpl1
0.0199757	-0.0449518	0.018	0.05	1	mm10-Rreb1
0.0201009	0.0873027	0.243	0.236	1	mm10-Rab14
0.0201676	0.0355789	0.026	0.005	1	mm10-Dapk3
0.0202931	0.121099	0.304	0.215	1	mm10-Dynll1
0.0202997	0.0673295	0.068	0.058	1	mm10-Polg
0.0203423	-0.0580153	0.775	0.853	1	mm10-Zeb2
0.0204028	0.138574	0.484	0.415	1	mm10-Btf3
0.0205053	-0.0797733	0.026	0.068	1	mm10-Slc36a3os
0.0206758	-0.0916681	0.068	0.123	1	mm10-Fam208b
0.0207257	-0.076443	0.018	0.055	1	mm10-Rin2
0.0207443	0.0802209	0.097	0.047	1	mm10-Numb
0.0207972	0.139839	0.259	0.22	1	mm10-Fbxl3
0.0208008	-0.122557	0.081	0.144	1	mm10-Phf23
0.0208608	-0.0895431	0.102	0.165	1	mm10-Pip4k2a
0.0208838	-0.101573	0.037	0.084	1	mm10-Smc4
0.0210389	0.0617945	0.047	0.026	1	mm10-Ttpal
0.0212222	0.054598	0.029	0.005	1	mm10-Gm45894
0.0213259	-0.103421	0.045	0.094	1	mm10-Ncstn
0.0213741	-0.0852501	0.102	0.163	1	mm10-Cept1
0.0214284	-0.111191	0.018	0.055	1	mm10-Tcf4
0.0214956	0.122943	0.131	0.071	1	mm10-Hspa4
0.0215042	0.0778092	0.045	0.016	1	mm10-Gm26669
0.0215042	-0.168172	0.277	0.37	1	mm10-Gm46224
0.0215423	0.13235	0.348	0.302	1	mm10-Rpl22
0.0216852	-0.0481538	0.008	0.029	1	mm10-Sesn3
0.021692	0.146379	0.257	0.192	1	mm10-2010107E04Rik
0.0217012	-0.151686	0.157	0.236	1	mm10-Apaf1
0.0217355	0.158123	0.361	0.307	1	mm10-Creg1
0.0218146	0.0473609	0.026	0.005	1	mm10-Pdzd11
0.0218897	-0.0124531	0.034	0.06	1	mm10-Cxcr1
0.0219167	0.147965	0.335	0.299	1	mm10-Rheb
0.0220041	0.106329	0.215	0.139	1	mm10-Ap3s1
0.0220048	-0.0723899	0.018	0.055	1	mm10-Rab3ip
0.0220085	-0.108419	0.039	0.087	1	mm10-Luc7l3
0.0220568	-0.0323109	0.016	0.042	1	mm10-Armc8
0.0221555	-0.055138	0.008	0.034	1	mm10-Rexo1
0.0221861	0.0808142	0.058	0.021	1	mm10-Med20
0.0222391	0.134977	0.45	0.381	1	mm10-Vamp8
0.0222517	-0.13989	0.128	0.202	1	mm10-Ccdc146
0.0222647	0.114074	0.147	0.084	1	mm10-Gm26809
0.0222703	0.108952	0.846	0.861	1	mm10-Taldo1
0.0222932	-0.165523	0.613	0.685	1	mm10-Cflar
0.0224507	-0.13391	0.099	0.16	1	mm10-Pgap2
0.0224598	0.128629	0.107	0.066	1	mm10-Rapgef1
0.0224838	-0.00915194	0.887	0.942	1	mm10-2810474O19Rik
0.0225154	-0.107001	0.037	0.081	1	mm10-1700041G16Rik
0.0226523	-0.0690208	0.024	0.063	1	mm10-Pgrmc1
0.0226664	0.109195	0.134	0.087	1	mm10-Rnaseh2c
0.022816	0.0827371	0.055	0.018	1	mm10-Zfp719
0.0228675	-0.036189	0.008	0.029	1	mm10-Arfgap3
0.0228845	0.0973061	0.914	0.929	1	mm10-Rpl41
0.0229191	0.10437	0.047	0.021	1	mm10-Usp36
0.0230843	-0.0928945	0.259	0.341	1	mm10-Lims1
0.0231256	0.0724246	0.042	0.013	1	mm10-Acbd5
0.023146	-0.12827	0.34	0.436	1	mm10-Gatad2a
0.0231672	0.146735	0.421	0.354	1	mm10-Serp1
0.02317	0.0375838	0.008	0.013	1	mm10-Nifk
0.0231766	-0.167538	0.118	0.189	1	mm10-Dck
0.0232626	0.116452	0.738	0.73	1	mm10-Itgb2
0.0233056	-0.121477	0.804	0.864	1	mm10-Ezr
0.0234774	-0.0348159	0.003	0.024	1	mm10-Bmi1
0.0235128	0.111489	0.089	0.045	1	mm10-Trp53inp2
0.0236131	0.0659202	0.209	0.142	1	mm10-Cdc42ep4
0.0236621	-0.00173481	0.055	0.079	1	mm10-Myo1d
0.0237755	0.202917	0.257	0.194	1	mm10-Pgd
0.023801	-0.0357024	0.008	0.031	1	mm10-Uba3
0.023906	-0.09135	0.016	0.05	1	mm10-Gmppb
0.0239135	0.0631105	0.024	0.003	1	mm10-C330018D20Rik
0.0244311	0.0420038	0.024	0.003	1	mm10-Tmem176b
0.0244525	-0.0992324	0.052	0.105	1	mm10-Gapvd1
0.0245127	-0.119911	0.097	0.163	1	mm10-Gm43796
0.0245253	0.0851867	0.086	0.05	1	mm10-Nsmce1
0.0245956	0.048332	0.029	0.005	1	mm10-Irgc1
0.0246096	-0.163264	0.12	0.192	1	mm10-Tpp2
0.0247236	-0.0684821	0.047	0.097	1	mm10-Mt1
0.0248667	-0.0836793	0.013	0.045	1	mm10-Tmem165
0.02492	0.148322	0.487	0.444	1	mm10-Anxa11
0.0249343	0.0497287	0.024	0.003	1	mm10-Pigc
0.0249704	-0.0860387	0.055	0.108	1	mm10-Cds2
0.0250614	-0.0434178	0.003	0.024	1	mm10-Gm26637
0.0250865	0.127926	0.293	0.262	1	mm10-Gm26532
0.0251021	-0.0393747	0.003	0.024	1	mm10-Washc1
0.0251357	-0.123724	0.204	0.289	1	mm10-Ypel5
0.0251638	0.106908	0.223	0.147	1	mm10-Vps29
0.0251946	-0.149529	0.097	0.134	1	mm10-Hipk1
0.0252495	-0.11005	0.047	0.094	1	mm10-Hmga1
0.0252912	0.0590841	0.047	0.016	1	mm10-Dguok
0.0253462	0.158998	0.327	0.247	1	mm10-Arl4c
0.0254451	0.120683	0.217	0.173	1	mm10-Prelid1
0.0254848	-0.114984	0.089	0.152	1	mm10-Ints12
0.0254923	0.143498	0.259	0.205	1	mm10-2810403A07Rik
0.0255472	-0.0660875	0.01	0.037	1	mm10-Rabgap1l
0.0257216	-0.236721	0.005	0.029	1	mm10-Gdf15
0.0257249	0.131323	0.128	0.071	1	mm10-Matr3
0.0257258	0.10385	0.06	0.026	1	mm10-Ppp1r13b
[truncated: 10,103 more rows]

## Sheet: Supplement 2
Figure 3 - Supplement 1 Source Data
B - deltaCq values						D - deltaCq values						F - deltaCq values
mock	HSV-1	HSV-2				mock	HSV-1	HSV-2				mock	HSV-1	HSV-2
0.00198033	0.239848	0.249627				0.00647407	0.520384	0.827583				0.00250383	0.00211822	0.00223707
0.00137953	0.0473882	0.369848				0.0125778	0.213019	0.580153				0.00290067	0.00228118	0.00261893
0.00187569	0.0469613	0.426119				0.010912	0.25416	0.855494				0.00354242	0.00207349	0.00389179
	0.172077	0.495236					0.470746	1.11938					0.00373107	0.00392434
	0.145526	0.327413					0.377599	1.15946					0.00530838	0.00423921
	0.019177	0.300643					0.042356	0.98041					0.00286328	0.00850387
	0.145077	0.439035					0.562253	1.49979					0.00298267	0.00272089
	0.184709	0.57474					0.578035	1.39137					0.00336639	0.00499129
	0.36046	0.504832					0.898886	1.65095					0.00291648	0.00401265
one-way ANOVA with Tukey's multiple comparisons test						one-way ANOVA with Tukey's multiple comparisons test						one-way ANOVA with Tukey's multiple comparisons test
p values: mock vs HSV-1 = 0.0940, mock vs HSV-2<0.0001,						p values: mock vs HSV-1 = 0.1108, mock vs HSV-2<0.0001,						p values: mock vs HSV-1 = 0.9952, mock vs HSV-2 = 0.4655,
HSV-1 vs HSV-2 = 0.0001						HSV-1 vs HSV-2 = 0.0002						HSV-1 vs HSV-2 = 0.2830

## Sheet: Supplement 3
Figure 3 - Supplement 2 Source Data
A - IFNb ELISA values (pg/ml)
uninfected	HSV-1	HSV-2
1	168.77	80.057
1	69.3465	58.4492
1	226.69	9.41487
1	159.314	83.0045
1	62.7123	35.8337
1	50.9968	70.6049
1	20.1385	7.39192
1	50.9968	46.9945
	147.399	61.0901
one-way ANOVA with Tukey's multiple comparisons test
p values: uninfected vs HSV-1 = 0.0002, uninfected vs HSV-2 = 0.0806, HSV-1 vs HSV-2 = 0.0364
all samples with undetectable IFNb were assigned a value of 1 (under the limit of detection)
B - IFNb ELISA values (pg/ml)
uninfected	HSV-1	HSV-2
1	1	1
1	1	1
1	1	1
1	1	1
1	1	1
1	1	1
1	1	1
1		1
		1
all samples with undetectable IFNb were assigned a value of 1 (under the limit of detection)
C - IFNb ELISA values (pg/ml)
uninfected	HSV-1	HSV-2
1	1	1
1	1	1
1	1	1
1	1	1
1	1	1
1	1	1
1	1	1
1		1
		1
all samples with undetectable IFNb were assigned a value of 1 (under the limit of detection)
