# Supplementary material for: A sustained type I IFN-neutrophil-IL-18 axis drives pathology during mucosal viral infection
Source: eLife. 2021 May 28;10:e65762. doi: 10.7554/eLife.65762 (PMC8163503; doi:10.7554/eLife.65762)
Supplement: Figure 4—figure supplement 1—source data 1. [file elife-65762-fig4-figsupp1-data1.xlsx]

## Sheet: Sheet1
Figure 4 - Supplement 1 Source Data
A - inflammation scores
d.p.i.	isotype
4	0	0	0.5	0	0	0	0.5
5	1	1	0	1	0.5	0	1.5
6	1	2	2	1.5	1	0	2
7	1	2	2	1.5	1.5	1.5	5
d.p.i.	anti-IFNAR1
4	1	1	0.5	1	0	1	0.5	0.5	1	1
5	2	2	1.5	1.5	1.5	2	1	1.5	2	2
6	5	4.5	2.5	2.5	3.5	4.5	3	4.5	4	3
7	5	5	4.5	4.5	5	5	5	5	5	5
repeated measures two-way ANOVA with Geisser-Greenhouse correction (epsilon = 0.7977) and Bonferroni's multiple comparisons test
p values: d4 = 0.0032, d5 = 0.0104, d6 = 0.0002, d7 = 0.0051
B - survival
d.p.i.	isotype	anti-IFNAR1
9	1			1 denotes moribundity/death
9	1
10	1
10	1
11	1
14	1
7	1
6		1
7		1
8		1
8		1
7		1
7		1
7		1
7		1
7		1
7		1
log-rank test
p value = 0.0005
D - raw viral titers
d.p.i.	isotype
2	55400	193600	45200	12000	3800	7866.67	21600
4	26600	29200	25600	13173.3	4880	2300	1700
6	580	7480	1872	436	84	56	18960
d.p.i.	anti-IFNAR1
2	221600	377200	216400	115600	640000	642000	662000	654000	420000	388000
4	258800	244800	188800	88000	236800	94200	201200	250000	210000	430000
6		614000	188000	42200	396000	176000	143200	254000	1020000	552000
two-way ANOVA on log10 transformed values with Bonferroni's multiple comparisons test
p values: d2, d4, d6<0.0001
samples with no plaques are assigned a value of 3 (under the limit of detection of 4)
