# Supplementary material for: A sustained type I IFN-neutrophil-IL-18 axis drives pathology during mucosal viral infection
Source: eLife. 2021 May 28;10:e65762. doi: 10.7554/eLife.65762 (PMC8163503; doi:10.7554/eLife.65762)
Supplement: Figure 4—source data 1. [file elife-65762-fig4-data1.xlsx]

## Sheet: Sheet1
Figure 4 - Source Data
A - inflammation scores
d.p.i.	isotype ctrl
4	0	0	0	0	0	0	0	0	0	0	0	0	0	0	0	0	0	0	0	0	0	0	0	0
5	1	2	1	2	1	0	1	0.5	1	0	0.5	0	1	1	1	0	0	1	0.5	0.5	1	1.5	1.5	0
6	1.5	2	1.5	3	2	2	1.5	0.5	2	0.5	1	0.5	2	2	1	1	0	1	1.5	1.5	1	1.5	2	1.5
7	2	3.5	1.5	5	2.5				5	2	1	2.5	2							2.5	2	2.5
d.p.i.	anti-IFNAR1
4	0	0	0	0	0	0	0	0	0	0	0	0	0	0	0	0	0	0	0	0
5	0	0	0	0.5	0.5	0.5	0	0	0	0.5	0	0.5	0	0	0	0	0.5	1	0.5	0
6	0.5	1	0	0.5	0	1	0	0.5	1	0.5	1	1.5	0.5	0	0.5	0.5	1	1.5	1.5	0
7	1	2.5	0			2.5	0	1	2						1.5	2.5		1.5
Mixed-effects analysis with Geisser-Greenhouse correction (epsilon = 0.5724) and Bonferroni's multiple comparisons test
p values: d5 = 0.0012, d6 = 0.0004, d7 = 0.0699
C - raw viral titers
d.p.i.	isotype ctrl
2	97200	154400	47000	64200	86800	64600	123200	40200	405200	93600	45200	154000	99600	88800	63800	17440	38800	40400	29000	304800	104800	29600	2400000	122800
4	16693.3	8693.33	34053.3	65400	8720	16200	27000	19000	18200	19200	8200	13386.7	67400	5760	1640	2820	14000	8720	9173.33	11600	5800	14240	8040	27160
6	412	1784	284	4768	152				5340	178	597.333	1408	1820	412	672	520	17.3333	138.667	40	220	294	1616	294	54
d.p.i.	anti-IFNAR1
2	95000	39800	54800	41000	31600	252000	6800	176400	80400	35880	18000	46000	43080	44400	116000	23800	38800	37200	48400	4400
4	19600	8880	17600	4066.67	9333.33	13600	8840	4580	5860	25040	8986.67	7680	3540	5020	7000	4080	2580	6520	10960	5840
6	480	400	284			992	52	154	1904	150	784	274	94	76	692	744	400	1032	346	140
Mixed-effects analysis on log10 transformed values and Bonferroni's multiple comparisons test
p values: d2 = 0.0574, d4 = 0.2640, d6>0.9999
samples with no plaques are assigned a value of 3 (under the limit of detection of 4)
