# Supplementary material for: A sustained type I IFN-neutrophil-IL-18 axis drives pathology during mucosal viral infection
Source: eLife. 2021 May 28;10:e65762. doi: 10.7554/eLife.65762 (PMC8163503; doi:10.7554/eLife.65762)
Supplement: Figure 5—source data 1. [file elife-65762-fig5-data1.xlsx]

## Sheet: Sheet1
Figure 5 - Source Data
B - cell counts
d.p.i.	ctrl
2	108000	45300	172000	30900	69400	70900	21600
4	120000	119000	40400	7940	41500	49000	67200
6	125000	72400	131000	10700	39000	18700	11500
d.p.i.	IFNAR CKO
2	152000	8020	46800	32700
4	169000	45400	68100	38800
6	122000	10700	20500	11000
two-way ANOVA and Bonferroni's multiple comparisons test
p values: d2, d4, d6>0.9999
C - inflammation scores
d.p.i.	ctrl
4	0	0	0	0	0	0	0	0	0	0	0	0	0
5	0	1	1	1	0.5	0.5	0	1	1	0	1	0.5	0
6	1	1.5	2	1.5	1	1.5	0.5	1.5	2	0	1.5	1.5	1
7	1.5	2	2.5	2	1.5	2	0.5	2	2.5	2
d.p.i.	IFNAR CKO
4	0	0	0	0	0	0	0	0	0	0	0
5	0	0	0	0	0	0	0.5	0	0	0	0.5
6	0	0.5	0	0	0	0.5	1	0	0	1	1.5
7	0.5	1	1	0	0	0.5	2	1
Mixed effects analysis with Geisser-Greenhouse correction (epsilon = 0.7693) Bonferroni's multiple comparisons test
p values: d5 = 0.0107, d6 = 0.0039, d7 = 0.0088
E - raw viral titers
d.p.i.	ctrl
2	28000	71600	33200	1040	560	1680	19200	4880	7170	3200
4	15000	8120	22400	480	3	1040	6050	3400	980	1740
6				56	40	3	108	254	795	48
d.p.i.	IFNAR CKO
2	38200	17000	27400	4400	14700	26400	55600	4200
4	7960	6600	19600	760	6270	7010	2940	12000
6				180	201	94	294	571
two-way ANOVA on 1og10 transformed values and Bonferroni's multiple comparisons test
p values: d2 = 0.3121, d4, d6>0.9999
samples with no plaques are assigned a value of 3 (under the limit of detection of 4)
							0.60206
