# Supplementary material for: A sustained type I IFN-neutrophil-IL-18 axis drives pathology during mucosal viral infection
Source: eLife. 2021 May 28;10:e65762. doi: 10.7554/eLife.65762 (PMC8163503; doi:10.7554/eLife.65762)
Supplement: Figure 6—figure supplement 1—source data 1. [file elife-65762-fig6-figsupp1-data1.xlsx]

## Sheet: Sheet1
Figure 6 - Supplement 1 Source Data
A - Bioplex data IL-6			B - Bioplex data - IL-1b			C - Bioplex data - TNF
isotype	anti-Ly6G		isotype	anti-Ly6G		isotype	anti-Ly6G
20.04	100.73		161.81	131.6		32.23	36.16
23.6	71.11		125.16	132.09		40.59	48
12.26	42.98		99.44	157.95		51.97	53.45
51.09	65.96		280.14	243.01		54.94	108.73
79.07	38.47		199.51	125.16		52.96	38.13
27.82	101.07		85.56	116.42		61.24	98.05
87.9	29.76		78.28	122.31		90.01	64.7
12.45	50.2		98.23	125.55		87.71	90.01
	59.41			139.58			106.09
two-tailed unpaired t-test			two-tailed unpaired t-test			two-tailed unpaired t-test
p value = 0.1094			p value = 0.9209			p value = 0.3308
D - Bioplex data - IFNg			E- Bioplex data - IL-12p70
isotype	anti-Ly6G		isotype	anti-Ly6G
89.95	89.63		11.48	20.23
150.33	112.59		14.35	37.27
116.7	189.59		5.92	19.9
253.88	127.82		16.62	21.89
89.15	90.91		15.32	15.32
66.69	80.96		2	38.97
68.99	126.4		13.6	15.3
93.7	120.15		27.82	12.44
	124.43			17.49
two-tailed unpaired t-test			two-tailed unpaired t-test
p value = 0.9372			p value = 0.0581
