# Supplementary material for: A sustained type I IFN-neutrophil-IL-18 axis drives pathology during mucosal viral infection
Source: eLife. 2021 May 28;10:e65762. doi: 10.7554/eLife.65762 (PMC8163503; doi:10.7554/eLife.65762)
Supplement: Figure 6—source data 1. [file elife-65762-fig6-data1.xlsx]

## Sheet: Sheet1
Figure 6 - Source Data
A - ELISA data (pg/ml)			B - ELISA data (pg/ml)			C - ELISA data (pg/ml)
isotype	anti-Ly6G		isotype	anti-IFNAR1		ctrl	IFNAR CKO
41.7657	24.1028		24.0601	20.9511		44.6045	21.9524
31.738	13.6929		17.8507	17.8507		50.3074	46.504
23.6732	16.3276		22.5046	2		96.833	29.4691
29.3368	2		34.9909	17.1425		67.9238	51.0506
31.5527	2		22.4136	19.8005		47.1225	61.6345
20.3254	44.6259		32.5284	22.4136		41.4423	20.3254
61.6345	24.7043		39.853	14.4371		67.981	9.37194
37.1333	16.4819		42.256	8.33972
49.6432	14.4371		35.0555	39.2134		two-tailed unpaired t-test
30.9069	10.365		30.9069	37.1333		p= 0.0317
49.6432	8.33972		35.0555	8.33972
32.98			70.6218	8.33972
			16.4819
two-tailed unpaired t-test			12.3979
p = 0.0005
			two-tailed unpaired t-test
			p=0.0173
D - inflammation scores
d.p.i.	isotype
4	0	0	0	0	0	0	0	0	0	0	0	0	0	0	0	0
5	1	0	1	0	1	0.5	0	1	0.5	0.5	1	0.5	1	2	1	1.5
6	2	0	2	1	2	0	1	1.5	1	1	1.5	1	5	2.5	1	2
7	2.5	1.5	2.5	2	4.5	0.5	1.5	2	1	2	2.5	5	5	5	2	5
d.p.i.	anti-IL-18
4	0	0	0	0	0	0	0	0	0	0	0	0	0	0	0	0	0	0
5	0	0	0	0	0	0	0	0	0	0.5	1	0	0	1	0.5	0.5	1.5	0.5
6	0	0.5	0	1	0	0	1	0	0.5	1	1	0	1	1	1	2	2	2
7	1	1	0.5	2	0.5	1	2	1	1.5	1.5	1	1	1	2	2	2	2	2
repeated measures two-way ANOVA with Geisser-Greenhouse correction (epsilon = 0.6692) and Bonferroni's multiple comparisons test
p values: d5 = 0.0423, d6 = 0.1360, d7 = 0.0136
E - raw viral titers
d.p.i.	isotype
1						52000	152000	90800	20800	43600	4940	5520	15600	2720
3	5520	360	800	347	1600	2440	4280	20600	6786.67	7626.67	3220	1540	1220	3360
5	7720	1800	1280	1200	1300	5300	2885.33	11320	15240	11160	2620	3100	9600	2820
d.p.i.	anti-IL-18
1						86800	89600	94800	81200	75200	2720	7000	2320	2040
3	5410	1200	1000	4850	1860	5960	53200	2000	4320	43000	3620	3620	3200	1460
5	5200	700	3800	1600	2800	12160	6320	6360	9680	8960	3600	4760	1372	1188
Mixed-effects analysis on log10 transformed values with Bonferroni's multiple comparisons test
p values: d1>0.9999, d3 = 0.6920, d5>0.999
samples with no plaques are assigned a value of 3 (under the limit of detection of 4)
